# Supplementary material for: Metabolic reprogramming of fibro/adipogenic progenitors facilitates muscle regeneration
Source: Life Sci Alliance. 2020 Feb 4;3(3):e202000646. doi: 10.26508/lsa.202000660 (PMC7003708; doi:10.26508/lsa.202000660)
Supplement: Supplementary file 2 [file LSA-2020-00646_TableS2.xlsx]

## Sheet: MDX_WT
				SCs WT LFD			SCs WT HFD		SCs MDX LFD		SCs MDX HFD			Student t-test S0=0.1; FDR<0.1
Protein IDs	Majority protein IDs	Protein names	Gene names	SCs_WT_LF_2	SCs_WT_LF_3	SCs_WT_LF_4	SCs_WT_HF_2	SCs_WT_HF_3	SCs_MDX_LF_2	SCs_MDX_LF_3	SCs_MDX_HF_1	SCs_MDX_HF_2	SCs_MDX_HF_3	Student's t-test Significant SCs_MDX_LF_SCs_WT_LF	-Log Student's t-test p-value SCs_MDX_LF_SCs_WT_LF	Student's t-test q-value SCs_MDX_LF_SCs_WT_LF	Student's t-test Difference SCs_MDX_LF_SCs_WT_LF	Peptides	Razor + unique peptides	Unique peptides	Sequence coverage [%]	Unique + razor sequence coverage [%]	Unique sequence coverage [%]	Mol. weight [kDa]	Q-value	Score	Intensity	MS/MS count	GOBP name	GOMF name	GOCC name	KEGG name	Keywords
A0A0G2JFX7;A0A023T672;Q9CWZ3;Q9CWZ3-2;A0A0G2JEA9;A0A067XG47	A0A0G2JFX7;A0A023T672;Q9CWZ3;Q9CWZ3-2;A0A0G2JEA9;A0A067XG47	RNA-binding protein 8A	RBM8;Rbm8a	27.4139	27.8576	27.4548	27.2765	27.3002	27.3334	27.3839	27.8997	27.5079	27.5588		0.490592	0.301001	-0.216754	4	4	4	21.1	21.1	21.1	19.143	0	32.495	6194800000	49	biological regulation;catabolic process;cellular catabolic process;cellular macromolecule catabolic process;cellular macromolecule metabolic process;cellular metabolic process;cellular nitrogen compound metabolic process;cellular process;establishment of localization;establishment of RNA localization;macromolecule catabolic process;macromolecule metabolic process;metabolic process;mRNA catabolic …	binding;nucleic acid binding;nucleotide binding;RNA binding	cell part;cytoplasm;intracellular organelle part;intracellular part;macromolecular complex;nuclear body;nuclear part;nuclear speck;nucleoplasm part;organelle part;ribonucleoprotein complex;spliceosomal complex	mRNA surveillance pathway;RNA transport;Spliceosome	Acetylation;Alternativesplicing;Completeproteome;Cytoplasm;mRNAprocessing;mRNAsplicing;mRNAtransport;Nonsense-mediatedmRNAdecay;Nucleus;Phosphoprotein;Referenceproteome;RNA-binding;Spliceosome;Translationregulation;Transport
Q9CQL1;P61327;A0A023T778;G3UYI5;G3UZW7	Q9CQL1;P61327;A0A023T778;G3UYI5;G3UZW7	Protein mago nashi homolog 2;Protein mago nashi homolog	Magohb;Magoh	27.1823	27.1731	27.4538	27.4882	27.1035	27.7727	27.7234	27.9554	27.4697	27.4245	+	1.54616	0.0276199	0.478296	5	5	5	36.3	36.3	36.3	17.091	0	8.2631	8000800000	68	biological regulation;catabolic process;cellular catabolic process;cellular macromolecule catabolic process;cellular macromolecule metabolic process;cellular metabolic process;cellular nitrogen compound metabolic process;cellular process;establishment of localization;establishment of RNA localization;female gamete generation;gamete generation;macromolecule catabolic process;macromolecule metaboli…	binding;nucleic acid binding;RNA binding	catalytic step 2 spliceosome;cell part;cytoplasm;exon-exon junction complex;intracellular membrane-bounded organelle;intracellular organelle;intracellular organelle part;intracellular part;macromolecular complex;membrane-bounded organelle;nuclear body;nuclear part;nuclear speck;nucleoplasm part;nucleus;organelle;organelle part;protein complex;ribonucleoprotein complex;spliceosomal complex	mRNA surveillance pathway;RNA transport;Spliceosome	Acetylation;Completeproteome;Cytoplasm;mRNAprocessing;mRNAsplicing;mRNAtransport;Nonsense-mediatedmRNAdecay;Nucleus;Referenceproteome;RNA-binding;Spliceosome;Translationregulation;Transport
O70589;O70589-3;A0A067XG53;O70589-4;O70589-5;O70589-2;F6ZQR2;F6Y9I5;B1AUH5	O70589;O70589-3;A0A067XG53;O70589-4;O70589-5;O70589-2;F6ZQR2	Peripheral plasma membrane protein CASK	Cask	26.5268	26.3283	26.5537	26.5109	26.3676	26.2135	26.3376	26.498	26.3979	26.5799		0.808813	0.208812	-0.194024	8	8	8	8.9	8.9	8.9	105.11	0	7.9375	3601700000	64	biological regulation;calcium ion import;calcium ion transmembrane transport;calcium ion transport;cation transport;cellular process;divalent inorganic cation transport;divalent metal ion transport;establishment of localization;ion transmembrane transport;ion transport;metal ion transport;negative regulation of biological process;negative regulation of cell adhesion;negative regulation of cell pr…	adenyl nucleotide binding;adenyl ribonucleotide binding;ATP binding;binding;catalytic activity;kinase activity;neurexin family protein binding;nucleotide binding;phosphotransferase activity, alcohol group as acceptor;protein binding;protein kinase activity;protein serine/threonine kinase activity;purine nucleotide binding;purine ribonucleoside triphosphate binding;purine ribonucleotide binding;ri…	basement membrane;basolateral plasma membrane;cell junction;cell part;cell-cell junction;cytoplasmic part;cytosol;extracellular matrix part;extracellular region part;intracellular membrane-bounded organelle;intracellular non-membrane-bounded organelle;intracellular organelle;intracellular organelle part;intracellular part;membrane part;membrane-bounded organelle;non-membrane-bounded organelle;nuc…	Tight junction	3D-structure;Alternativesplicing;ATP-binding;Calmodulin-binding;Cellmembrane;Completeproteome;Cytoplasm;Kinase;Membrane;Nucleotide-binding;Nucleus;Phosphoprotein;Referenceproteome;Repeat;Serine/threonine-proteinkinase;SH3domain;Transferase
A0A075B5P2;P01837	A0A075B5P2;P01837	Ig kappa chain C region	Igkc	NaN	NaN	NaN	NaN	NaN	NaN	NaN	28.9467	NaN	NaN		-4.34294e-08	1	0	3	3	3	33.6	33.6	33.6	11.778	0	3.3747	8557400000	4		antigen binding;binding	cell part;membrane;plasma membrane		3D-structure;Completeproteome;Directproteinsequencing;Disulfidebond;ImmunoglobulinCregion;Immunoglobulindomain;Referenceproteome
A0A075B5P4;A0A0A6YWR2	A0A075B5P4;A0A0A6YWR2		Ighg1	NaN	NaN	NaN	NaN	NaN	NaN	NaN	NaN	24.8831	NaN		-4.34294e-08	1	0	6	1	1	23.5	5.2	5.2	35.633	0	56.549	356510000	10
Q91Z67;A0A087WNM1;A0A087WRV4;A0A087WS59;A0A087WSQ1;Q91Z69;D3YZW1	Q91Z67;A0A087WNM1;A0A087WRV4;A0A087WS59;A0A087WSQ1	SLIT-ROBO Rho GTPase-activating protein 2	Srgap2	NaN	NaN	NaN	24.8895	NaN	NaN	NaN	NaN	NaN	NaN		-4.34294e-08	1	0	4	4	4	4.9	4.9	4.9	120.8	0	7.7404	653550000	10	actin filament severing;actin filament-based process;anatomical structure development;anatomical structure morphogenesis;biological regulation;cell migration;cell motility;cell part morphogenesis;cell projection assembly;cell projection morphogenesis;cell projection organization;cellular component assembly;cellular component assembly at cellular level;cellular component morphogenesis;cellular com…	binding;enzyme activator activity;enzyme binding;enzyme regulator activity;GTPase activator activity;GTPase binding;GTPase regulator activity;identical protein binding;nucleoside-triphosphatase regulator activity;protein binding;protein dimerization activity;protein homodimerization activity;Rac GTPase activator activity;Rac GTPase binding;Ras GTPase activator activity;Ras GTPase binding;Rho GTPa…	cell junction;cell part;cell projection;cytoplasmic membrane-bounded vesicle;cytoplasmic part;cytoplasmic vesicle;cytoskeletal part;cytosol;endocytic vesicle;intracellular;intracellular membrane-bounded organelle;intracellular organelle;intracellular organelle part;intracellular part;lamellipodium;membrane;membrane-bounded organelle;membrane-bounded vesicle;mitochondrial inner membrane;mitochondr…	Axon guidance	3D-structure;Celljunction;Cellmembrane;Cellprojection;Coiledcoil;Completeproteome;Cytoplasm;Cytoplasmicvesicle;GTPaseactivation;Membrane;Methylation;Neurogenesis;Nucleus;Phosphoprotein;Postsynapticcellmembrane;Referenceproteome;SH3domain;Synapse
Q4VAA2;A0A087WNP6;Q4VAA2-2;A0A087WRM0;F8WGL9;A0A087WS49	Q4VAA2;A0A087WNP6;Q4VAA2-2;A0A087WRM0	Protein CDV3	Cdv3	26.458	26.5396	26.9864	NaN	NaN	26.9615	27.0089	NaN	26.7682	26.9228		0.647138	0.181391	0.323864	7	7	7	36.7	36.7	36.7	29.729	0	77.525	4472300000	30			cell part;cytoplasm;intracellular non-membrane-bounded organelle;intracellular organelle;intracellular organelle part;intracellular part;non-membrane-bounded organelle;nuclear part;nucleolus;organelle;organelle part		Acetylation;Alternativesplicing;Completeproteome;Cytoplasm;Phosphoprotein;Referenceproteome
P83940;A0A087WQE6;A0A087WNT1;A0A087WPE4	P83940;A0A087WQE6;A0A087WNT1;A0A087WPE4	Transcription elongation factor B polypeptide 1	Tceb1	27.8465	27.8758	27.7471	27.3893	27.2734	28.322	28.4257	27.9739	27.9176	27.9068	+	2.49294	0.0128403	0.550688	4	4	4	28.6	28.6	28.6	12.473	0	33.888	9541700000	90	biological regulation;biosynthetic process;catabolic process;cellular biosynthetic process;cellular catabolic process;cellular macromolecule biosynthetic process;cellular macromolecule catabolic process;cellular macromolecule metabolic process;cellular metabolic process;cellular nitrogen compound metabolic process;cellular process;macromolecule biosynthetic process;macromolecule catabolic process…		cell part;cytoplasmic part;cytoplasmic ubiquitin ligase complex;intracellular membrane-bounded organelle;intracellular organelle;intracellular part;macromolecular complex;membrane-bounded organelle;nucleus;organelle;protein complex;ubiquitin ligase complex;VCB complex	Pathways in cancer;Renal cell carcinoma;Ubiquitin mediated proteolysis	3D-structure;Completeproteome;Nucleus;Referenceproteome;Transcription;Transcriptionregulation;Ublconjugationpathway
G5E8E1;A0A087WNU6;Q3UZ39-2;A0A087WSF5;E9Q9T1;A0A087WPK3;Q3UZ39	G5E8E1;A0A087WNU6;Q3UZ39-2;A0A087WSF5;E9Q9T1;A0A087WPK3	Leucine-rich repeat flightless-interacting protein 1	Lrrfip1	NaN	NaN	NaN	NaN	NaN	NaN	NaN	NaN	NaN	NaN		-4.34294e-08	1	0	3	3	3	8.4	8.4	8.4	48.918	0	6.2727	302980000	7	biological regulation;biosynthetic process;cellular biosynthetic process;cellular macromolecule biosynthetic process;cellular macromolecule metabolic process;cellular metabolic process;cellular nitrogen compound metabolic process;cellular process;macromolecule biosynthetic process;macromolecule metabolic process;metabolic process;nitrogen compound metabolic process;nucleic acid metabolic process;…	binding;DNA binding;nucleic acid binding	cell part;cytoplasm;intracellular membrane-bounded organelle;intracellular organelle;intracellular part;membrane-bounded organelle;nucleus;organelle		Acetylation;Alternativesplicing;Coiledcoil;Completeproteome;Cytoplasm;DNA-binding;Nucleus;Phosphoprotein;Referenceproteome;Repressor;Transcription;Transcriptionregulation
Q8K2K6;A0A087WNV1;A0A087WSR7;A0A087WR52;Q8K2K6-3;Q8K2K6-1;Q8K2K6-2;A0A087WRL1	Q8K2K6;A0A087WNV1;A0A087WSR7;A0A087WR52;Q8K2K6-3;Q8K2K6-1;Q8K2K6-2;A0A087WRL1	Arf-GAP domain and FG repeat-containing protein 1	Agfg1	26.069	25.5613	25.6412	25.8434	NaN	25.5286	25.8928	25.6911	26.1378	NaN		0.0647079	0.852059	-0.0464303	4	4	4	11.9	11.9	11.9	58.042	0	116.32	3593200000	36	acrosome assembly;anatomical structure formation involved in morphogenesis;biological regulation;cellular component assembly;cellular component assembly at cellular level;cellular component assembly involved in morphogenesis;cellular component organization;cellular component organization at cellular level;cellular component organization or biogenesis;cellular component organization or biogenesis …	ARF GTPase activator activity;binding;cation binding;DNA binding;enzyme activator activity;enzyme regulator activity;GTPase activator activity;GTPase regulator activity;ion binding;metal ion binding;nucleic acid binding;nucleoside-triphosphatase regulator activity;small GTPase regulator activity;transition metal ion binding;zinc ion binding	cell body;cell part;cell projection;cytoplasmic membrane-bounded vesicle;cytoplasmic part;cytoplasmic vesicle;Golgi apparatus;intracellular membrane-bounded organelle;intracellular organelle;intracellular part;membrane-bounded organelle;membrane-bounded vesicle;neuronal cell body;nucleus;organelle;vesicle		Alternativesplicing;Completeproteome;Cytoplasmicvesicle;Developmentalprotein;Differentiation;DNA-binding;Glycoprotein;Metal-binding;Nucleus;Phosphoprotein;Referenceproteome;Repeat;Spermatogenesis;Transport;Zinc;Zinc-finger
Q80TV8;A0A087WS18;J3QP81;A0A087WRK0;A0A087WQF1;E9Q6L0;A0A087WQ95;A0A087WNW8;A0A087WP42;E9QNY9;A0A087WRE8;E9QKH0;A0A087WQ31;Q80TV8-2;A0A0A6YWK1;A0A0A6YXZ1;A0A087WRU7	Q80TV8;A0A087WS18;J3QP81;A0A087WRK0;A0A087WQF1;E9Q6L0;A0A087WQ95;A0A087WNW8;A0A087WP42;E9QNY9;A0A087WRE8;E9QKH0;A0A087WQ31;Q80TV8-2	CLIP-associating protein 1	Clasp1	NaN	NaN	NaN	25.1705	NaN	24.9845	25.0095	24.9637	NaN	24.9209		0	0.97671	NaN	8	5	5	5.5	3.6	3.6	169.23	0	4.7763	1053200000	12	biological regulation;cell cycle process;cell division;cellular component organization;cellular component organization at cellular level;cellular component organization or biogenesis;cellular component organization or biogenesis at cellular level;cellular process;cytoskeleton organization;establishment of localization;establishment of localization in cell;establishment of organelle localization;e…	binding;cytoskeletal protein binding;kinetochore binding;microtubule binding;protein binding;tubulin binding	cell cortex part;cell part;centrosomal corona;chromosomal part;condensed chromosome kinetochore;cortical cytoskeleton;cortical microtubule cytoskeleton;cytoplasmic microtubule;cytoplasmic part;cytoskeletal part;cytoskeleton;Golgi apparatus;intracellular membrane-bounded organelle;intracellular non-membrane-bounded organelle;intracellular organelle;intracellular organelle part;intracellular part;k…		Alternativesplicing;Cellcycle;Celldivision;Centromere;Chromosome;Coiledcoil;Completeproteome;Cytoplasm;Cytoskeleton;Golgiapparatus;Kinetochore;Microtubule;Mitosis;Phosphoprotein;Referenceproteome;Repeat
G5E870;A0A087WNZ7;A0A087WRV6;A0A0B4J1N9	G5E870;A0A087WNZ7;A0A087WRV6	E3 ubiquitin-protein ligase TRIP12	Trip12	25.1471	NaN	NaN	24.5962	NaN	25.0036	25.982	25.0417	24.7574	NaN		0	0.976268	0.345675	10	10	10	6	6	6	224.13	0	17.603	1801000000	30	biological regulation;cellular macromolecule metabolic process;cellular metabolic process;cellular nitrogen compound metabolic process;cellular process;cellular protein metabolic process;cellular response to stimulus;cellular response to stress;developmental process;DNA metabolic process;DNA repair;embryo development;macromolecule metabolic process;macromolecule modification;metabolic process;neg…	acid-amino acid ligase activity;catalytic activity;ligase activity;ligase activity, forming carbon-nitrogen bonds;small conjugating protein ligase activity;ubiquitin-protein ligase activity	cell part;cytoplasm;intracellular organelle part;intracellular part;nuclear part;nucleoplasm;organelle part	Ubiquitin mediated proteolysis	Acetylation;Completeproteome;DNAdamage;DNArepair;Ligase;Nucleus;Phosphoprotein;Referenceproteome;Ublconjugationpathway
Q3UQA7;A0A087WPM0;A0A087WNU1	Q3UQA7;A0A087WPM0;A0A087WNU1	Selenoprotein H	Selh;2700094K13Rik	NaN	NaN	NaN	NaN	NaN	NaN	NaN	NaN	NaN	NaN		-4.34294e-08	1	0	2	2	2	18.1	18.1	18.1	12.974	0.0019531	1.6481	238070000	3	biological regulation;cell redox homeostasis;cellular homeostasis;cellular process;homeostatic process;regulation of biological process;regulation of biological quality;regulation of cellular process	binding;selenium binding			Acetylation;Completeproteome;Redox-activecenter;Referenceproteome;Selenocysteine
P20917;P20917-2;A0A087WPR1;Q3ZB60;A0A087WRD6;A0A087WPP5	P20917;P20917-2;A0A087WPR1;Q3ZB60	Myelin-associated glycoprotein	Mag	31.4735	31.3547	31.5648	32.3466	32.1126	31.478	31.3576	31.9778	32.0292	31.9857		0.192241	0.735416	-0.0465447	12	12	12	24.9	24.9	24.9	69.259	0	323.31	79617000000	221	biological adhesion;cell adhesion;cellular process		axon part;cell part;cell projection part;integral to membrane;intrinsic to membrane;membrane part;myelin sheath;paranode region of axon;Schmidt-Lanterman incisure	Cell adhesion molecules (CAMs)	Alternativesplicing;Celladhesion;Completeproteome;Directproteinsequencing;Disulfidebond;Glycoprotein;Immunoglobulindomain;Lectin;Lipoprotein;Membrane;Palmitate;Referenceproteome;Repeat;Signal;Transmembrane;Transmembranehelix
E9Q171;A0A087WR56;E9PW06;A0A087WPX3;Q810U3;A0A087WNW2	E9Q171;A0A087WR56;E9PW06;A0A087WPX3;Q810U3;A0A087WNW2	Neurofascin	Nfasc	25.8586	25.3291	25.45	25.8546	25.6924	25.3722	25.0682	25.2096	25.4267	25.4058		0.583148	0.204679	-0.325681	5	5	5	5.3	5.3	5.3	130.24	0	5.6603	984990000	11	anatomical structure development;anatomical structure formation involved in morphogenesis;axon guidance;cell junction assembly;cell junction organization;cell-cell junction assembly;cell-cell junction organization;cellular component assembly;cellular component assembly at cellular level;cellular component assembly involved in morphogenesis;cellular component organization;cellular component organi…		axon part;cell junction;cell part;cell projection part;cell-cell junction;initial segment;integral to membrane;intracellular;intrinsic to membrane;membrane;membrane part;node of Ranvier;paranodal junction;paranode region of axon;plasma membrane	Cell adhesion molecules (CAMs)	Celladhesion;Cellmembrane;Completeproteome;Directproteinsequencing;Disulfidebond;Glycoprotein;Immunoglobulindomain;Membrane;Phosphoprotein;Referenceproteome;Repeat;Signal;Transmembrane;Transmembranehelix
Q69Z38;A0A087WQ01	Q69Z38;A0A087WQ01	Pseudopodium-enriched atypical kinase 1	Peak1	NaN	NaN	NaN	NaN	NaN	24.0083	23.7174	NaN	NaN	24.1169		0	0.975826	NaN	2	2	2	1.4	1.4	1.4	191.09	0.00050352	1.9208	330460000	7	anatomical structure morphogenesis;biological adhesion;cell adhesion;cell migration;cell morphogenesis;cell morphogenesis involved in differentiation;cell motility;cell-substrate adhesion;cellular component morphogenesis;cellular component movement;cellular component organization;cellular component organization or biogenesis;cellular developmental process;cellular macromolecule metabolic process;…	adenyl nucleotide binding;adenyl ribonucleotide binding;ATP binding;binding;catalytic activity;kinase activity;non-membrane spanning protein tyrosine kinase activity;nucleotide binding;phosphotransferase activity, alcohol group as acceptor;protein kinase activity;protein tyrosine kinase activity;purine nucleotide binding;purine ribonucleoside triphosphate binding;purine ribonucleotide binding;rib…	actin cytoskeleton;adherens junction;anchoring junction;cell junction;cell part;cell-substrate adherens junction;cell-substrate junction;cytoplasm;cytoskeleton;focal adhesion;intracellular non-membrane-bounded organelle;intracellular organelle;intracellular part;non-membrane-bounded organelle;organelle		ATP-binding;Celljunction;Completeproteome;Cytoplasm;Cytoskeleton;Kinase;Nucleotide-binding;Phosphoprotein;Referenceproteome;Transferase;Tyrosine-proteinkinase
Q8R0S2;E9PUA3;A0A087WQ39;Q8R0S2-2;Q5DU25;A4GZ26;D3Z6V7;D3Z5I6;E9QAD8	Q8R0S2;E9PUA3;A0A087WQ39;Q8R0S2-2	IQ motif and SEC7 domain-containing protein 1	Iqsec1	25.4739	NaN	NaN	NaN	25.6372	25.5284	25.4939	25.9456	25.4137	25.7312		0	0.975385	0.0372248	7	7	6	7.5	7.5	6.7	108.01	0	6.2392	1561500000	20	actin cytoskeleton organization;actin filament-based process;biological regulation;cellular component organization;cellular component organization at cellular level;cellular component organization or biogenesis;cellular component organization or biogenesis at cellular level;cellular process;cytoskeleton organization;organelle organization;regulation of ARF protein signal transduction;regulation o…	ARF guanyl-nucleotide exchange factor activity;binding;enzyme regulator activity;GTPase regulator activity;guanyl-nucleotide exchange factor activity;lipid binding;nucleoside-triphosphatase regulator activity;phospholipid binding;small GTPase regulator activity	cell junction;cell part;cytoplasm;intracellular membrane-bounded organelle;intracellular non-membrane-bounded organelle;intracellular organelle;intracellular organelle part;intracellular part;membrane-bounded organelle;non-membrane-bounded organelle;nuclear part;nucleolus;nucleus;organelle;organelle part	Endocytosis	Alternativesplicing;Coiledcoil;Completeproteome;Cytoplasm;Guanine-nucleotidereleasingfactor;Phosphoprotein;Referenceproteome
E9PUQ8;A0A087WQ75	E9PUQ8;A0A087WQ75	Diacylglycerol kinase	Dgkd	NaN	NaN	NaN	NaN	NaN	NaN	NaN	NaN	NaN	NaN		-4.34294e-08	1	0	1	1	1	0.7	0.7	0.7	135.21	0.0012456	1.8123	10450000000	16	activation of protein kinase activity;activation of protein kinase C activity by G-protein coupled receptor protein signaling pathway;biological regulation;cell surface receptor linked signaling pathway;cellular component assembly;cellular component organization;cellular component organization or biogenesis;cellular process;cellular response to stimulus;G-protein coupled receptor protein signalin…	binding;catalytic activity;diacylglycerol kinase activity;kinase activity;lipid binding;phospholipid binding;phosphotransferase activity, alcohol group as acceptor;transferase activity;transferase activity, transferring phosphorus-containing groups	cell part;cytoplasmic membrane-bounded vesicle;cytoplasmic part;cytoplasmic vesicle;intracellular membrane-bounded organelle;intracellular organelle;intracellular part;membrane;membrane-bounded organelle;membrane-bounded vesicle;organelle;plasma membrane;vesicle	Glycerolipid metabolism;Glycerophospholipid metabolism;Phosphatidylinositol signaling system	Completeproteome;Referenceproteome
Q9D937;A0A087WQJ5;A0A087WRC2	Q9D937;A0A087WQJ5;A0A087WRC2	Uncharacterized protein C11orf98 homolog	1810009A15Rik;Ints5	NaN	NaN	NaN	NaN	NaN	NaN	NaN	NaN	NaN	NaN		-4.34294e-08	1	0	1	1	1	11.4	11.4	11.4	14.098	0.0005184	2.1391	157070000	4					Completeproteome;Referenceproteome
A0A087WQM0;A0A087WQS0;E9Q0S6;A0A087WRU0;A0A087WQ94;Q9DBT6;A0A087WSC8;A0A087WR29;A0A087WPC7;A0A087WP40	A0A087WQM0;A0A087WQS0;E9Q0S6;A0A087WRU0;A0A087WQ94		Tns1	31.9379	31.571	31.4784	31.7098	31.6377	31.3629	31.6249	31.4284	31.5098	31.6127		0.325299	0.448529	-0.168527	44	44	42	33.8	33.8	32.7	194.7	0	323.31	66988000000	599	ameboidal cell migration;biological regulation;cell junction assembly;cell junction organization;cell migration;cell motility;cell-substrate junction assembly;cellular component assembly;cellular component assembly at cellular level;cellular component movement;cellular component organization;cellular component organization at cellular level;cellular component organization or biogenesis;cellular c…	actin binding;binding;cation binding;cytoskeletal protein binding;ion binding;metal ion binding;protein binding	adherens junction;anchoring junction;cell junction;cell-substrate adherens junction;cell-substrate junction;focal adhesion		Completeproteome;Metal-binding;Referenceproteome;Zinc;Zinc-finger
A0A087WQQ5;F8VQC7;A0A087WS29;A0A087WNW3;A0A087WQI3;A0A087WQ25;A0A087WP85;A0A087WRS1;A0A087WP14;A0A087WPX0;Q61595;A0A087WQF8;A0A087WP48;A0A087WS04;A0A087WQG4;A0A087WQD0;A0A087WPW5;A0A087WS23;Q61595-5;Q61595-3;Q61595-6;Q61595-9;Q61595-15;Q61595-10;Q61595-7;Q61595-11;Q61595-2;Q61595-12;Q61595-16;Q61595-14;Q61595-4;Q61595-8;Q61595-13;A0A087WR91;A0A087WPY8	A0A087WQQ5;F8VQC7;A0A087WS29;A0A087WNW3;A0A087WQI3;A0A087WQ25;A0A087WP85;A0A087WRS1;A0A087WP14;A0A087WPX0;Q61595;A0A087WQF8;A0A087WP48;A0A087WS04;A0A087WQG4;A0A087WQD0;A0A087WPW5;A0A087WS23;Q61595-5;Q61595-3;Q61595-6;Q61595-9;Q61595-15;Q61595-10;Q61595-7;Q61595-11;Q61595-2;Q61595-12;Q61595-16;Q61595-14;Q61595-4;Q61595-8;Q61595-13	Kinectin	Ktn1	29.5795	29.5601	29.4617	29.5998	29.3049	29.9484	29.9461	29.8915	29.6414	29.6772	+	2.50745	0.0119184	0.413508	31	31	31	24.5	24.5	24.5	146.43	0	235.52	26954000000	197	cellular component movement;cellular process;microtubule-based movement;microtubule-based process	binding;cytoskeletal protein binding;kinesin binding;protein binding	cell part;cytoplasmic part;endoplasmic reticulum;endoplasmic reticulum membrane;endoplasmic reticulum part;integral to membrane;intracellular membrane-bounded organelle;intracellular organelle;intracellular organelle part;intracellular part;intrinsic to membrane;membrane;membrane part;membrane-bounded organelle;organelle;organelle membrane;organelle part		Alternativesplicing;Coiledcoil;Completeproteome;Endoplasmicreticulum;Glycoprotein;Isopeptidebond;Membrane;Phosphoprotein;Referenceproteome;Signal-anchor;Transmembrane;Transmembranehelix;Ublconjugation
Q9CQC6;A0A087WQS2;A0A087WPF9	Q9CQC6;A0A087WQS2;A0A087WPF9	Basic leucine zipper and W2 domain-containing protein 1	Bzw1	NaN	NaN	NaN	NaN	NaN	NaN	NaN	NaN	NaN	NaN		-4.34294e-08	1	0	3	3	3	6.9	6.9	6.9	48.043	0	2.7347	1615400000	7	biological regulation;biosynthetic process;cellular biosynthetic process;cellular macromolecule biosynthetic process;cellular macromolecule metabolic process;cellular metabolic process;cellular nitrogen compound metabolic process;cellular process;macromolecule biosynthetic process;macromolecule metabolic process;metabolic process;nitrogen compound metabolic process;nucleic acid metabolic process;…		cell part;cytoplasm;intracellular part		Activator;Completeproteome;Phosphoprotein;Referenceproteome;Transcription;Transcriptionregulation
Q2HXL6;A0A087WR24;B7ZNP0;A0A087WQK5	Q2HXL6;A0A087WR24;B7ZNP0;A0A087WQK5	ER degradation-enhancing alpha-mannosidase-like protein 3;alpha-1,2-Mannosidase	Edem3	NaN	NaN	NaN	NaN	NaN	23.701	NaN	NaN	NaN	23.884		0	0.974943	NaN	4	4	4	6	6	6	104.2	0	3.6449	553840000	11	catabolic process;cellular catabolic process;cellular macromolecule catabolic process;cellular macromolecule metabolic process;cellular metabolic process;cellular process;glycoprotein catabolic process;glycoprotein metabolic process;macromolecule catabolic process;macromolecule metabolic process;metabolic process;modification-dependent macromolecule catabolic process;modification-dependent protei…	alpha-mannosidase activity;binding;calcium ion binding;catalytic activity;cation binding;glycoprotein endo-alpha-1,2-mannosidase activity;hydrolase activity;hydrolase activity, acting on glycosyl bonds;hydrolase activity, hydrolyzing O-glycosyl compounds;ion binding;mannosidase activity;mannosyl-oligosaccharide 1,2-alpha-mannosidase activity;mannosyl-oligosaccharide mannosidase activity;metal ion…	cell part;cytoplasmic part;endoplasmic reticulum lumen;endoplasmic reticulum part;intracellular organelle lumen;intracellular organelle part;intracellular part;membrane;membrane-enclosed lumen;organelle lumen;organelle part	Protein processing in endoplasmic reticulum	Completeproteome;Endoplasmicreticulum;Glycoprotein;Hydrolase;Phosphoprotein;Referenceproteome;Signal;Unfoldedproteinresponse
A0A087WSN6;A0A087WR50;P11276;B9EHT6;Q3UHL6;B7ZNJ1;A0A087WS56;A0A087WS99;Q4KL80	A0A087WSN6;A0A087WR50;P11276;B9EHT6;Q3UHL6;B7ZNJ1;A0A087WS56	Fibronectin;Anastellin	Fn1	29.4243	29.8234	29.551	30.0992	29.9655	29.1993	29.1718	29.3818	29.9563	29.858	+	1.13856	0.0706476	-0.41403	28	28	28	17.7	17.7	17.7	253.01	0	191.6	18151000000	186	acute inflammatory response;acute-phase response;anatomical structure formation involved in morphogenesis;anatomical structure morphogenesis;angiogenesis;biological adhesion;biological regulation;calcium-independent cell-matrix adhesion;cell adhesion;cell junction assembly;cell junction organization;cell morphogenesis;cell morphogenesis involved in differentiation;cell-matrix adhesion;cell-substr…	binding;carbohydrate binding;enzyme activator activity;enzyme regulator activity;glycosaminoglycan binding;heparin binding;pattern binding;peptidase activator activity;peptidase regulator activity;polysaccharide binding	apical plasma membrane;basement membrane;cell part;cytoplasmic part;endoplasmic reticulum-Golgi intermediate compartment;extracellular matrix part;extracellular region part;fibrinogen complex;intracellular membrane-bounded organelle;intracellular organelle;intracellular part;macromolecular complex;membrane part;membrane-bounded organelle;organelle;plasma membrane part;protein complex	Amoebiasis;Bacterial invasion of epithelial cells;ECM-receptor interaction;Focal adhesion;Pathways in cancer;Regulation of actin cytoskeleton;Small cell lung cancer	3D-structure;Acutephase;Alternativesplicing;Angiogenesis;Celladhesion;Cellshape;Completeproteome;Disulfidebond;Extracellularmatrix;Glycoprotein;Heparin-binding;Isopeptidebond;Phosphoprotein;Pyrrolidonecarboxylicacid;Referenceproteome;Repeat;Secreted;Signal;Sulfation
D0QMC3;A0A087WRA4;A0A087WSH9;A0A087WQG9	D0QMC3;A0A087WRA4	Myeloid cell nuclear differentiation antigen-like protein	Mndal	NaN	25.3476	25.0634	25.3886	25.2322	25.4421	25.7574	25.4391	25.4091	25.408		0.689548	0.145778	0.394244	12	5	5	29.7	12.3	12.3	60.526	0	24.803	1499700000	22	biological regulation;negative regulation of biological process;negative regulation of cell growth;negative regulation of cellular process;negative regulation of growth;regulation of biological process;regulation of cell growth;regulation of cellular component organization;regulation of cellular process;regulation of growth		cell part;intracellular membrane-bounded organelle;intracellular organelle;intracellular part;membrane-bounded organelle;nucleus;organelle		Completeproteome;Growthregulation;Nucleus;Polymorphism;Referenceproteome
Q7TQG1;A0A087WRB7;E9PX43;A0A087WP13	Q7TQG1;A0A087WRB7;E9PX43	Pleckstrin homology domain-containing family A member 6	Plekha6	NaN	NaN	NaN	NaN	NaN	NaN	NaN	NaN	NaN	NaN		-4.34294e-08	1	0	3	3	3	3.1	3.1	3.1	131.43	0	4.1984	1016700000	3		binding;lipid binding;phospholipid binding			Completeproteome;Phosphoprotein;Referenceproteome
Q6P3D0;A0A087WRE5;A0A087WSB5;E9Q9G1	Q6P3D0;A0A087WRE5;A0A087WSB5	U8 snoRNA-decapping enzyme	Nudt16	NaN	NaN	NaN	NaN	NaN	NaN	NaN	NaN	NaN	NaN		-4.34294e-08	1	0	4	3	3	22.1	16.4	16.4	21.825	0	5.1393	167470000	6	2'-deoxyribonucleotide metabolic process;adenosine to inosine editing;base conversion or substitution editing;biological regulation;catabolic process;cellular catabolic process;cellular component organization;cellular component organization at cellular level;cellular component organization or biogenesis;cellular component organization or biogenesis at cellular level;cellular macromolecule catabol…	binding;catalytic activity;cation binding;cobalt ion binding;dITP diphosphatase activity;exopeptidase activity;GTP binding;guanyl nucleotide binding;guanyl ribonucleotide binding;hydrolase activity;hydrolase activity, acting on acid anhydrides;hydrolase activity, acting on acid anhydrides, in phosphorus-containing anhydrides;hydrolase activity, acting on ester bonds;identical protein binding;ion …	cell part;cytoplasm;intracellular non-membrane-bounded organelle;intracellular organelle;intracellular organelle part;intracellular part;non-membrane-bounded organelle;nuclear part;nucleolus;nucleoplasm;organelle;organelle part		Completeproteome;Cytoplasm;Hydrolase;Magnesium;Manganese;Metal-binding;Nucleotide-binding;Nucleotidemetabolism;Nucleus;Referenceproteome;RNA-binding
Q80XU3;A0A087WRY3	Q80XU3;A0A087WRY3	Nuclear ubiquitous casein and cyclin-dependent kinase substrate 1	Nucks1	28.7367	28.8283	28.7149	28.6023	28.7819	28.7719	28.9795	28.5833	28.6456	28.5634		0.543153	0.403169	0.115747	3	3	3	14.1	14.1	14.1	26.313	0	16.536	11763000000	31			cell part;cytoplasm;intracellular membrane-bounded organelle;intracellular organelle;intracellular part;membrane-bounded organelle;nucleus;organelle		Completeproteome;Nucleus;Phosphoprotein;Referenceproteome
Q921F2;A0A087WRZ5;Q8R0B4;Q8BLD4;Q6VYI5;Q6VYI4;A0A087WQA5;A0A087WR97;A0A087WRP4;H3BJV1;A0A087WSH7;A0A087WS74;A0A087WSE4;A0A087WQX8;A0A087WNY6;A0A087WS17;A0A087WP57;A0A087WSC6	Q921F2;A0A087WRZ5;Q8R0B4;Q8BLD4;Q6VYI5;Q6VYI4;A0A087WQA5;A0A087WR97;A0A087WRP4;H3BJV1;A0A087WSH7	TAR DNA-binding protein 43	Tardbp	30.0943	30.2611	29.9776	30.2312	30.026	30.3725	30.4238	30.2224	30.1355	30.1304		1.11753	0.104036	0.287153	9	9	9	25.8	25.8	25.8	44.547	0	117.55	39963000000	150	3'-UTR-mediated mRNA stabilization;biological regulation;biosynthetic process;cellular biosynthetic process;cellular macromolecule biosynthetic process;cellular macromolecule metabolic process;cellular metabolic process;cellular nitrogen compound metabolic process;cellular process;interaction with symbiont;interspecies interaction between organisms;macromolecule biosynthetic process;macromolecule…	binding;DNA binding;double-stranded DNA binding;mRNA 3'-UTR binding;mRNA binding;nucleic acid binding;nucleotide binding;RNA binding;structure-specific DNA binding	cell part;intracellular membrane-bounded organelle;intracellular organelle;intracellular part;membrane-bounded organelle;nucleus;organelle		3D-structure;Completeproteome;Directproteinsequencing;DNA-binding;mRNAprocessing;mRNAsplicing;Nucleus;Phosphoprotein;Referenceproteome;Repeat;Repressor;RNA-binding;Transcription;Transcriptionregulation;Ublconjugation
A0A087WS27;D3Z5S8;Q8C152	A0A087WS27;D3Z5S8;Q8C152	Protein FAM46B	Fam46a;Fam46b	NaN	NaN	NaN	NaN	NaN	NaN	NaN	NaN	NaN	NaN		-4.34294e-08	1	0	2	2	2	4.9	4.9	4.9	48.481	0.0012425	1.792	289500000	9					Completeproteome;Referenceproteome
O70251;A0A087WS46;M0QWK5;M0QWH8;G3UX43;G3UZ47	O70251;A0A087WS46	Elongation factor 1-beta	Eef1b;Eef1b2	28.9095	28.7609	28.7855	28.5767	28.4167	29.7596	29.4365	29.4928	29.0929	29.1454	+	1.99242	0.011845	0.779405	8	6	6	39.6	34.7	34.7	24.693	0	140.52	29866000000	88		binding;nucleic acid binding;RNA binding;translation elongation factor activity;translation factor activity, nucleic acid binding	cell part;cytoplasmic part;eukaryotic translation elongation factor 1 complex;intracellular part;macromolecular complex;protein complex		Acetylation;Completeproteome;Directproteinsequencing;Elongationfactor;Phosphoprotein;Proteinbiosynthesis;Referenceproteome
Q8C3V4;A0A087WSP5;P42225;Q99K94;Q8CFQ1;A0A087WRI1;A0A087WSQ5	Q8C3V4;A0A087WSP5;P42225;Q99K94	Signal transducer and activator of transcription;Signal transducer and activator of transcription 1	Stat1	26.9601	27.9044	26.6103	27.3037	26.5577	27.8248	28.1722	28.0979	27.3275	27.6954		0.695473	0.105043	0.840182	15	15	15	22.3	22.3	22.3	87.314	0	60.011	9461300000	99	activation of caspase activity;anatomical structure development;biological regulation;biosynthetic process;blood circulation;cell differentiation;cell differentiation involved in kidney development;cell differentiation involved in metanephros development;cell proliferation;cell proliferation involved in kidney development;cell proliferation involved in metanephros development;cell surface recepto…	binding;calcium ion binding;cation binding;core promoter binding;core promoter proximal region DNA binding;core promoter proximal region sequence-specific DNA binding;core promoter sequence-specific DNA binding;DNA binding;double-stranded DNA binding;ion binding;metal ion binding;molecular transducer activity;nucleic acid binding;nucleic acid binding transcription factor activity;regulatory regio…	axon;cell part;cell projection;chromatin;chromosomal part;cytoplasm;cytoplasmic part;cytosol;dendrite;intracellular membrane-bounded organelle;intracellular non-membrane-bounded organelle;intracellular organelle;intracellular organelle part;intracellular part;membrane-bounded organelle;neuron projection;non-membrane-bounded organelle;nuclear chromatin;nuclear chromosome part;nuclear part;nucleolu…	Chemokine signaling pathway;Hepatitis C;Jak-STAT signaling pathway;ko05152;Leishmaniasis;Measles;Osteoclast differentiation;Pancreatic cancer;Pathways in cancer;Toll-like receptor signaling pathway;Toxoplasmosis	Activator;Completeproteome;Cytoplasm;DNA-binding;Isopeptidebond;Nucleus;Phosphoprotein;Referenceproteome;SH2domain;Transcription;Transcriptionregulation;Ublconjugation
Q60759;A0A0A0MQ68	Q60759;A0A0A0MQ68	Glutaryl-CoA dehydrogenase, mitochondrial	Gcdh	NaN	25.5862	25.6911	25.3603	NaN	25.3379	NaN	25.1454	25.4237	25.5392		0	0.974503	-0.300719	3	3	3	8.9	8.9	8.9	48.605	0	4.6595	984940000	17	acyl-CoA biosynthetic process;acyl-CoA metabolic process;amine metabolic process;aromatic amino acid family metabolic process;biosynthetic process;carboxylic acid metabolic process;cellular amine metabolic process;cellular amino acid metabolic process;cellular aromatic compound metabolic process;cellular biogenic amine metabolic process;cellular biosynthetic process;cellular ketone metabolic proc…	acyl-CoA dehydrogenase activity;binding;carboxylic acid binding;catalytic activity;coenzyme binding;cofactor binding;fatty acid binding;fatty-acyl-CoA binding;flavin adenine dinucleotide binding;glutaryl-CoA dehydrogenase activity;lipid binding;monocarboxylic acid binding;oxidoreductase activity;oxidoreductase activity, acting on the CH-CH group of donors	cell part;cytoplasmic part;intracellular organelle lumen;intracellular organelle part;intracellular part;membrane;membrane-enclosed lumen;mitochondrial inner membrane;mitochondrial matrix;mitochondrial membrane;mitochondrial part;organelle inner membrane;organelle lumen;organelle membrane;organelle part	Benzoate degradation;Fatty acid metabolism;Lysine degradation;Tryptophan metabolism	Completeproteome;FAD;Flavoprotein;Mitochondrion;Oxidoreductase;Referenceproteome;Transitpeptide
Q3TLH4;S4R2J9;A0A0A0MQ79;Q3TLH4-5;S4R294;S4R2L9;S4R209;S4R2E2;S4R298	Q3TLH4;S4R2J9;A0A0A0MQ79;Q3TLH4-5;S4R294	Protein PRRC2C	Prrc2c	26.5378	26.2958	26.474	26.1883	26.5303	26.9976	26.818	26.8452	26.5734	26.2749	+	1.58236	0.0268718	0.471905	18	18	18	7.5	7.5	7.5	310.89	0	85.11	4950800000	87					Acetylation;Alternativesplicing;Coiledcoil;Completeproteome;Phosphoprotein;Referenceproteome
P97352;A0A0A0MQ90	P97352;A0A0A0MQ90	Protein S100-A13	S100a13	27.5177	27.8619	28.3979	NaN	27.576	27.5835	26.673	NaN	NaN	28.2277		0.719261	0.102299	-0.797564	4	4	4	40.8	40.8	40.8	11.158	0	30.205	16924000000	43	biological regulation;cellular process;cytokine secretion;establishment of localization;establishment of localization in cell;establishment of protein localization;interleukin-1 alpha secretion;interleukin-1 secretion;positive regulation of biological process;positive regulation of cell communication;positive regulation of cell proliferation;positive regulation of cellular process;positive regula…	binding;calcium ion binding;cation binding;copper ion binding;ion binding;lipid binding;metal ion binding;transition metal ion binding;zinc ion binding	cell part;cytoplasmic part;cytosol;extracellular region part;extracellular space;intracellular membrane-bounded organelle;intracellular organelle;intracellular part;membrane-bounded organelle;nucleus;organelle;perinuclear region of cytoplasm		3D-structure;Calcium;Completeproteome;Copper;Cytoplasm;Lipid-binding;Metal-binding;Phosphoprotein;Proteintransport;Referenceproteome;Repeat;Secreted;Transport
Q8K3D3-2;A0A0A0MQ99;V9GXX7;Q8K3D3	Q8K3D3-2;A0A0A0MQ99;V9GXX7;Q8K3D3	DNA repair protein SWI5 homolog	Swi5	NaN	NaN	NaN	NaN	NaN	NaN	NaN	NaN	NaN	NaN		-4.34294e-08	1	0	2	2	2	19	19	19	13.828	0	6.6411	504540000	10	cellular macromolecule metabolic process;cellular metabolic process;cellular nitrogen compound metabolic process;cellular process;cellular response to stimulus;cellular response to stress;DNA metabolic process;DNA recombination;DNA repair;double-strand break repair;double-strand break repair via homologous recombination;macromolecule metabolic process;metabolic process;nitrogen compound metabolic…		cell part;chromosomal part;DNA recombinase mediator complex;intracellular organelle part;intracellular part;macromolecular complex;nuclear chromosome part;nuclear part;organelle part;protein complex;Swi5-Sfr1 complex		Alternativesplicing;Coiledcoil;Completeproteome;DNAdamage;DNArepair;Nucleus;Phosphoprotein;Referenceproteome
Q00896;P07758;A0A0A0MQA3	Q00896;P07758;A0A0A0MQA3	Alpha-1-antitrypsin 1-3;Alpha-1-antitrypsin 1-1	Serpina1c;Serpina1a	NaN	NaN	NaN	NaN	NaN	NaN	NaN	NaN	NaN	23.9456		-4.34294e-08	1	0	3	1	1	8.5	1.9	1.9	45.823	0.0093565	1.1385	277500000	7	acute inflammatory response;acute-phase response;biological regulation;defense response;inflammatory response;regulation of biological process;regulation of macromolecule metabolic process;regulation of metabolic process;regulation of primary metabolic process;regulation of protein metabolic process;regulation of proteolysis;response to chemical stimulus;response to cytokine stimulus;response to …	endopeptidase inhibitor activity;endopeptidase regulator activity;enzyme inhibitor activity;enzyme regulator activity;peptidase inhibitor activity;peptidase regulator activity;serine-type endopeptidase inhibitor activity	extracellular region	Complement and coagulation cascades	Acutephase;Completeproteome;Glycoprotein;Proteaseinhibitor;Referenceproteome;Secreted;Serineproteaseinhibitor;Signal
P68368;A0A0A0MQA5;A0A087WQS4;A0A087WRB4;A0A087WSB0;A0A087WSL5	P68368;A0A0A0MQA5	Tubulin alpha-4A chain	Tuba4a	NaN	NaN	NaN	NaN	NaN	NaN	NaN	28.1057	NaN	27.6439		-4.34294e-08	1	0	18	3	3	50.4	7.6	7.6	49.924	0	31.465	4548100000	23	cellular component assembly;cellular component assembly at cellular level;cellular component organization;cellular component organization at cellular level;cellular component organization or biogenesis;cellular component organization or biogenesis at cellular level;cellular macromolecular complex assembly;cellular macromolecular complex subunit organization;cellular process;cellular protein compl…	binding;catalytic activity;GTP binding;GTPase activity;guanyl nucleotide binding;guanyl ribonucleotide binding;hydrolase activity;hydrolase activity, acting on acid anhydrides;hydrolase activity, acting on acid anhydrides, in phosphorus-containing anhydrides;nucleoside-triphosphatase activity;nucleotide binding;purine nucleotide binding;purine ribonucleoside triphosphate binding;purine ribonucleo…	cell part;cytoplasm;cytoskeletal part;intracellular organelle part;intracellular part;macromolecular complex;microtubule;organelle part;protein complex	Gap junction;Pathogenic Escherichia coli infection;Phagosome	Acetylation;Completeproteome;Cytoplasm;Cytoskeleton;Directproteinsequencing;GTP-binding;Microtubule;Nitration;Nucleotide-binding;Phosphoprotein;Referenceproteome
Q4PJX1;A0A0A0MQB0;Q4PJX1-3;Q4PJX1-2	Q4PJX1;A0A0A0MQB0;Q4PJX1-3;Q4PJX1-2	Protein odr-4 homolog	Odr4;BC003331	25.459	25.3677	NaN	NaN	NaN	25.5227	25.3722	NaN	NaN	NaN		0.133199	0.809953	0.0340805	5	5	5	13.6	13.6	13.6	49.997	0	11.504	1644000000	13		binding;catalytic activity;cation binding;ion binding;metal ion binding;oxidoreductase activity;transition metal ion binding;zinc ion binding	cell part;integral to membrane;intrinsic to membrane;membrane part		Alternativesplicing;Completeproteome;Membrane;Referenceproteome;Transmembrane;Transmembranehelix
Q8K2H2;A0A0A0MQF5	Q8K2H2;A0A0A0MQF5	OTU domain-containing protein 6B	Otud6b	NaN	NaN	NaN	NaN	NaN	NaN	NaN	NaN	NaN	NaN		-4.34294e-08	1	0	1	1	1	4.4	4.4	4.4	33.758	0.00050378	1.9238	161300000	7					Acetylation;Completeproteome;Referenceproteome
P16858;A0A0A0MQF6;S4R257;D3YYI5;V9GX06;V9GXA7;Q64467;S4R1N5;V9GXK0;S4R2G5	P16858;A0A0A0MQF6;S4R257;D3YYI5	Glyceraldehyde-3-phosphate dehydrogenase	Gapdh;Gm7293	33.0771	33.2008	32.8354	33.1075	33.0837	33.1921	33.5807	32.8882	33.4282	33.304		0.744137	0.142914	0.348654	19	19	1	69.4	69.4	5.1	35.81	0	323.31	242590000000	281	alcohol catabolic process;alcohol metabolic process;anatomical structure development;apoptosis;biological regulation;carbohydrate catabolic process;carbohydrate metabolic process;catabolic process;cell death;cell development;cell motility;cellular carbohydrate catabolic process;cellular carbohydrate metabolic process;cellular component movement;cellular component organization;cellular component o…	binding;catalytic activity;coenzyme binding;cofactor binding;cytoskeletal protein binding;glyceraldehyde-3-phosphate dehydrogenase (NAD+) (phosphorylating) activity;microtubule binding;NAD binding;NADP binding;nucleotide binding;oxidoreductase activity;oxidoreductase activity, acting on the aldehyde or oxo group of donors;oxidoreductase activity, acting on the aldehyde or oxo group of donors, NAD…	cell part;cell projection;cilium;cytoplasm;cytoplasmic part;cytoskeleton;cytosol;intracellular membrane-bounded organelle;intracellular non-membrane-bounded organelle;intracellular organelle;intracellular part;membrane-bounded organelle;microtubule cytoskeleton;motile cilium;non-membrane-bounded organelle;nucleus;organelle	Alzheimer's disease;Glycolysis / Gluconeogenesis	Acetylation;ADP-ribosylation;Apoptosis;Completeproteome;Cytoplasm;Cytoskeleton;Directproteinsequencing;Glycolysis;Methylation;NAD;Nucleus;Oxidoreductase;Phosphoprotein;Referenceproteome;S-nitrosylation;Transferase;Translationregulation;Ublconjugation
Q8R1N4;A0A0A0MQL8;Q8R1N4-2;Q8R1N4-3;B1AS63;Q8R1N4-4	Q8R1N4;A0A0A0MQL8;Q8R1N4-2;Q8R1N4-3	NudC domain-containing protein 3	Nudcd3	NaN	NaN	NaN	NaN	NaN	NaN	NaN	NaN	NaN	NaN		-4.34294e-08	1	0	3	3	3	9.1	9.1	9.1	40.89	0	3.4656	570110000	13					Alternativesplicing;Completeproteome;Phosphoprotein;Referenceproteome
P63242;A0A0A0MQM0;J3QPS8;Q8BGY2	P63242;A0A0A0MQM0;J3QPS8	Eukaryotic translation initiation factor 5A-1;Eukaryotic translation initiation factor 5A	Eif5a	29.4743	29.6405	29.5035	29.404	29.5184	30.6503	30.2828	30.2284	29.7908	29.906	+	2.05233	0.00819048	0.927119	5	5	5	31.2	31.2	31.2	16.832	0	108.58	50678000000	149	aging;amine biosynthetic process;amine metabolic process;biological regulation;biosynthetic process;carboxylic acid biosynthetic process;carboxylic acid metabolic process;cellular amine metabolic process;cellular amino acid biosynthetic process;cellular amino acid metabolic process;cellular biosynthetic process;cellular ketone metabolic process;cellular macromolecule metabolic process;cellular me…	binding;nucleic acid binding;ribonucleoprotein binding;ribosome binding;RNA binding;translation elongation factor activity;translation factor activity, nucleic acid binding	cell body;cell part;cell projection;cytoplasm;cytoplasmic part;dendrite;endoplasmic reticulum membrane;endoplasmic reticulum part;intracellular membrane-bounded organelle;intracellular organelle;intracellular organelle part;intracellular part;macromolecular complex;membrane;membrane part;membrane-bounded organelle;neuron projection;neuronal cell body;nuclear part;nuclear pore;nucleus;organelle;or…		Acetylation;Completeproteome;Cytoplasm;Directproteinsequencing;Elongationfactor;Endoplasmicreticulum;Hypusine;Membrane;mRNAtransport;Nuclearporecomplex;Nucleus;Proteinbiosynthesis;Proteintransport;Referenceproteome;RNA-binding;Translocation;Transport
Q5RL79;A0A0A0MQN1	Q5RL79;A0A0A0MQN1	Keratinocyte-associated protein 2	Krtcap2	25.0712	25.249	25.3327	25.0463	24.7598	25.4105	25.8948	25.8386	25.2256	25.2569	+	0.902156	0.0974784	0.435043	1	1	1	12.5	12.5	12.5	14.674	0	4.517	2783700000	33	carbohydrate metabolic process;cellular carbohydrate metabolic process;cellular macromolecule metabolic process;cellular metabolic process;cellular process;cellular protein metabolic process;glycosylation;macromolecule glycosylation;macromolecule metabolic process;macromolecule modification;metabolic process;peptidyl-amino acid modification;peptidyl-asparagine modification;primary metabolic proce…		cell part;integral to membrane;intrinsic to membrane;membrane part		Completeproteome;Membrane;Phosphoprotein;Referenceproteome;Transmembrane;Transmembranehelix
Q9D906;S4R2D5;S4R2T5;A0A0A0MQN4	Q9D906;S4R2D5;S4R2T5;A0A0A0MQN4	Ubiquitin-like modifier-activating enzyme ATG7	Atg7	NaN	NaN	NaN	24.5872	NaN	NaN	NaN	NaN	NaN	NaN		-4.34294e-08	1	0	1	1	1	1.3	1.3	1.3	77.519	0.0054567	1.3909	198570000	2	adult behavior;adult locomotory behavior;adult walking behavior;amine metabolic process;anatomical structure development;anatomical structure morphogenesis;autophagy;axonogenesis;behavior;biological regulation;carboxylic acid metabolic process;cardiac cell development;cardiac muscle cell development;catabolic process;cell development;cell part morphogenesis;cell projection morphogenesis;cell proj…	APG12 activating enzyme activity;catalytic activity;small protein activating enzyme activity;ubiquitin activating enzyme activity	cell part;cytoplasm;intracellular part	Regulation of autophagy	Autophagy;Completeproteome;Cytoplasm;Proteintransport;Referenceproteome;Transport;Ublconjugationpathway
Q921L3;A0A0A6YVS2	Q921L3;A0A0A6YVS2	Transmembrane and coiled-coil domain-containing protein 1	Tmco1	25.7014	25.9439	25.8144	25.9636	26.0917	NaN	26.4368	26.097	25.8732	26.2226		0	0.974062	0.616868	2	2	2	9	9	9	21.175	0.0014833	1.741	2092500000	28			cell part;cytoplasmic part;endoplasmic reticulum membrane;endoplasmic reticulum part;Golgi apparatus part;Golgi membrane;integral to membrane;intracellular organelle part;intracellular part;intrinsic to membrane;membrane;membrane part;organelle membrane;organelle part		Coiledcoil;Completeproteome;Endoplasmicreticulum;Golgiapparatus;Membrane;Phosphoprotein;Referenceproteome;Transmembrane;Transmembranehelix
Q9JKV1;A0A0A6YVU8;D3YUD8	Q9JKV1;A0A0A6YVU8;D3YUD8	Proteasomal ubiquitin receptor ADRM1	Adrm1;Gm9774	NaN	NaN	NaN	NaN	NaN	NaN	NaN	NaN	NaN	24.8621		-4.34294e-08	1	0	2	2	2	7.6	7.6	7.6	42.06	0	6.7008	1032800000	10	adipose tissue development;anatomical structure development;biological regulation;cell development;cell surface receptor linked signaling pathway;cellular developmental process;cellular process;cellular process involved in reproduction;cellular response to stimulus;developmental process;developmental process involved in reproduction;female gamete generation;follicle-stimulating hormone signaling …		cell part;cytoplasm;intracellular membrane-bounded organelle;intracellular organelle;intracellular part;macromolecular complex;membrane-bounded organelle;nucleus;organelle;proteasome complex;protein complex		3D-structure;Acetylation;Completeproteome;Cytoplasm;Isopeptidebond;Nucleus;Phosphoprotein;Proteasome;Referenceproteome;Ublconjugation
Q9JKP5;A0A0A6YXE3;A0A0A6YWB0;G3X9Q0;A0A0A6YVV8;A0A0A6YXP3;Q8R003;A0A0A6YXL7;S4R267;A0A0A6YWJ5;Q3U570;A0A0A6YWG1;Q3U581;A0A0A6YXQ4	Q9JKP5;A0A0A6YXE3;A0A0A6YWB0;G3X9Q0;A0A0A6YVV8;A0A0A6YXP3	Muscleblind-like protein 1	Mbnl1	27.4103	27.6337	27.4019	27.8893	27.6337	27.7969	28.0031	27.8873	27.7858	27.736	+	1.35822	0.045036	0.418005	7	7	3	16.1	16.1	5.9	36.975	0	7.6511	8132300000	56	alternative nuclear mRNA splicing, via spliceosome;anatomical structure development;anatomical structure morphogenesis;appendage morphogenesis;biological regulation;cell differentiation;cellular component assembly;cellular component assembly at cellular level;cellular component organization;cellular component organization at cellular level;cellular component organization or biogenesis;cellular co…	binding;cation binding;double-stranded RNA binding;ion binding;metal ion binding;nucleic acid binding;RNA binding;transition metal ion binding;zinc ion binding	cell part;cytoplasm;cytoplasmic part;Golgi apparatus;intracellular membrane-bounded organelle;intracellular non-membrane-bounded organelle;intracellular organelle;intracellular part;macromolecular complex;membrane-bounded organelle;non-membrane-bounded organelle;nucleus;organelle;ribonucleoprotein complex;RNA granule;stress granule		Completeproteome;Cytoplasm;Developmentalprotein;Directproteinsequencing;Metal-binding;mRNAprocessing;mRNAsplicing;Nucleus;Referenceproteome;Repeat;RNA-binding;Zinc;Zinc-finger
Q03173;Q03173-3;Q03173-4;A0A0A6YXC8;E9QKR1;A0A0A6YW06;J3QNM3;E9QKQ9;E9QLZ9;Q03173-6;Q03173-5;Q03173-2;A0A0A6YVZ6	Q03173;Q03173-3;Q03173-4;A0A0A6YXC8;E9QKR1;A0A0A6YW06;J3QNM3;E9QKQ9;E9QLZ9;Q03173-6;Q03173-5;Q03173-2	Protein enabled homolog	Enah	26.3223	26.5522	NaN	NaN	NaN	26.4308	26.5773	26.1852	NaN	25.9355		0.172273	0.710253	0.0668097	5	5	5	6.9	6.9	6.9	85.843	0	7.5155	1183400000	13	actin cytoskeleton organization;actin filament organization;actin filament-based process;actin polymerization or depolymerization;anatomical structure formation involved in morphogenesis;axon guidance;cellular component movement;cellular component organization;cellular component organization at cellular level;cellular component organization or biogenesis;cellular component organization or biogene…	binding;profilin binding;protein binding;protein domain specific binding;SH3 domain binding	actin filament bundle;actomyosin;adherens junction;anchoring junction;cell junction;cell part;cell projection;cell-substrate adherens junction;cell-substrate junction;cytoplasm;cytoplasmic part;cytoskeletal part;cytosol;filopodium;focal adhesion;intracellular organelle part;intracellular part;lamellipodium;membrane;organelle part;plasma membrane;stress fiber;synapse	Regulation of actin cytoskeleton	3D-structure;Actin-binding;Alternativesplicing;Celljunction;Cellprojection;Coiledcoil;Completeproteome;Cytoplasm;Cytoskeleton;Developmentalprotein;Differentiation;Neurogenesis;Phosphoprotein;Referenceproteome;Repeat;SH3-binding;Synapse
P35123;A0A0A6YW28;A0A0A6YVY7;A0A0A6YW63;A0A0A6YWM7	P35123;A0A0A6YW28;A0A0A6YVY7	Ubiquitin carboxyl-terminal hydrolase 4;Ubiquitin carboxyl-terminal hydrolase	Usp4	24.774	25.1851	NaN	NaN	24.9052	NaN	NaN	NaN	NaN	25.3969		0	0.973622	NaN	4	4	3	4.3	4.3	2.8	108.34	0	12.235	1223000000	29	biological regulation;catabolic process;cellular catabolic process;cellular localization;cellular macromolecule catabolic process;cellular macromolecule localization;cellular macromolecule metabolic process;cellular metabolic process;cellular process;cellular protein localization;cellular protein metabolic process;localization;macromolecule catabolic process;macromolecule localization;macromolecu…	binding;catalytic activity;cation binding;cysteine-type peptidase activity;hydrolase activity;hydrolase activity, acting on ester bonds;ion binding;metal ion binding;peptidase activity;peptidase activity, acting on L-amino acid peptides;small conjugating protein-specific protease activity;thiolester hydrolase activity;ubiquitin thiolesterase activity;ubiquitin-specific protease activity	cell part;cytoplasm;intracellular membrane-bounded organelle;intracellular organelle;intracellular part;membrane-bounded organelle;nucleus;organelle		3D-structure;Completeproteome;Cytoplasm;Hydrolase;Metal-binding;Nucleus;Phosphoprotein;Protease;Proto-oncogene;Referenceproteome;Repeat;Thiolprotease;Ublconjugation;Ublconjugationpathway;Zinc
Q9CR86;A0A0A6YW52	Q9CR86;A0A0A6YW52	Calcium-regulated heat stable protein 1	Carhsp1;Gm9791	26.7033	26.7209	26.678	26.9013	26.5232	27.0457	26.8733	26.6883	26.5952	26.6788	+	1.52557	0.0789482	0.258749	4	4	4	39.9	39.9	39.9	16.062	0	21.297	6515400000	71	biological regulation;cellular macromolecule metabolic process;cellular metabolic process;cellular nitrogen compound metabolic process;cellular process;macromolecule metabolic process;metabolic process;mRNA metabolic process;nitrogen compound metabolic process;nucleic acid metabolic process;nucleobase-containing compound metabolic process;posttranscriptional regulation of gene expression;primary …	binding;DNA binding;mRNA 3'-UTR binding;mRNA binding;nucleic acid binding;RNA binding	cell part;cytoplasmic mRNA processing body;cytoplasmic part;cytosol;intracellular non-membrane-bounded organelle;intracellular organelle;intracellular part;macromolecular complex;non-membrane-bounded organelle;organelle;P granule;ribonucleoprotein complex;RNA granule		Acetylation;Completeproteome;Cytoplasm;Phosphoprotein;Referenceproteome;RNA-binding
P97820;B7ZNR9;B2RUE8;A0A0A6YWR8;F8VPL5;A0A0A6YWM8;E9PVG7;A0A0A6YW53;Q9JM52;P83510;Q9JM52-3;F7AMS7;E0CZF8;E0CZD7;E0CXD6;E0CY98;E9PUL9;Q5SXG1;Q5SXG3;G3X9G2;B9EKN8;B2RQ80;P83510-2;Q9JM52-2;A0A0A6YVZ8	P97820;B7ZNR9;B2RUE8;A0A0A6YWR8;F8VPL5;A0A0A6YWM8;E9PVG7;A0A0A6YW53;Q9JM52;P83510;Q9JM52-3;F7AMS7;E0CZF8;E0CZD7;E0CXD6;E0CY98;E9PUL9;Q5SXG1;Q5SXG3;G3X9G2;B9EKN8;B2RQ80;P83510-2;Q9JM52-2;A0A0A6YVZ8	Mitogen-activated protein kinase kinase kinase kinase 4;Misshapen-like kinase 1;Traf2 and NCK-interacting protein kinase	Map4k4;Mink1;Tnik	26.5064	NaN	26.2118	NaN	NaN	26.6544	NaN	27.0255	25.8652	26.4039		0	0.973183	0.295344	4	4	4	2.9	2.9	2.9	140.6	0.00026882	2.4608	1882600000	14	actin cytoskeleton organization;actin cytoskeleton reorganization;actin filament-based process;activation of JNKK activity;activation of MAPKK activity;activation of protein kinase activity;anatomical structure morphogenesis;biological regulation;cell communication;cell part morphogenesis;cell projection morphogenesis;cell projection organization;cell surface receptor linked signaling pathway;cel…	adenyl nucleotide binding;adenyl ribonucleotide binding;ATP binding;binding;catalytic activity;enzyme regulator activity;GTPase regulator activity;kinase activity;nucleoside-triphosphatase regulator activity;nucleotide binding;phosphotransferase activity, alcohol group as acceptor;protein kinase activity;protein serine/threonine kinase activity;purine nucleotide binding;purine ribonucleoside trip…	axon;cell junction;cell part;cell projection;cytoplasm;cytoplasmic part;cytoskeletal part;cytoskeleton;endosome;Golgi apparatus;intracellular membrane-bounded organelle;intracellular non-membrane-bounded organelle;intracellular organelle;intracellular organelle part;intracellular part;membrane;membrane-bounded organelle;neuron projection;non-membrane-bounded organelle;nucleus;organelle;organelle …	MAPK signaling pathway	Acetylation;Alternativesplicing;ATP-binding;Celljunction;Cellmembrane;Cellprojection;Completeproteome;Cytoplasm;Cytoskeleton;Directproteinsequencing;Endosome;Kinase;Membrane;Neurogenesis;Nucleotide-binding;Nucleus;Phosphoprotein;Postsynapticcellmembrane;Referenceproteome;Serine/threonine-proteinkinase;Synapse;Transferase;Wntsignalingpathway
A0A0A6YW80;G3X8Y3;Q80UM3;A0A0A6YX86;Q9DBB4;A0A0A6YXF4;E9PZ53	A0A0A6YW80;G3X8Y3;Q80UM3	N-alpha-acetyltransferase 15, NatA auxiliary subunit	Naa15	26.6077	26.2429	26.3285	26.2228	26.3474	27.2313	26.873	27.1277	26.736	27.1115	+	1.36538	0.0279509	0.659164	7	7	7	7.4	7.4	7.4	95.295	0	5.5294	2588100000	30	anatomical structure formation involved in morphogenesis;angiogenesis;biological regulation;biosynthetic process;cell differentiation;cellular biosynthetic process;cellular developmental process;cellular macromolecule biosynthetic process;cellular macromolecule metabolic process;cellular metabolic process;cellular nitrogen compound metabolic process;cellular process;cellular protein metabolic pro…	acetyltransferase activity;binding;catalytic activity;N-acetyltransferase activity;N-acyltransferase activity;ribonucleoprotein binding;ribosome binding;transferase activity;transferase activity, transferring acyl groups;transferase activity, transferring acyl groups other than amino-acyl groups	cell part;cytoplasm;cytoplasmic part;intracellular membrane-bounded organelle;intracellular organelle;intracellular organelle part;intracellular part;macromolecular complex;membrane-bounded organelle;nuclear part;nucleoplasm part;nucleus;organelle;organelle part;perinuclear region of cytoplasm;protein complex;transcription factor complex		Acetylation;Angiogenesis;Completeproteome;Cytoplasm;Developmentalprotein;Differentiation;Nucleus;Phosphoprotein;Receptor;Referenceproteome;Repeat;TPRrepeat;Transcription;Transcriptionregulation
Q9EQX4;A0A0A6YWH2	Q9EQX4;A0A0A6YWH2	Allograft inflammatory factor 1-like	Aif1l	NaN	NaN	NaN	NaN	NaN	NaN	NaN	NaN	NaN	NaN		-4.34294e-08	1	0	1	1	1	6.7	6.7	6.7	17.024	0	5.4289	866420000	16		actin binding;actin filament binding;binding;calcium ion binding;cation binding;cytoskeletal protein binding;ion binding;metal ion binding;protein binding	actin filament;adherens junction;anchoring junction;cell junction;cell part;cell projection membrane;cell projection part;cell-substrate adherens junction;cell-substrate junction;cytoplasm;cytoskeletal part;focal adhesion;intracellular organelle part;intracellular part;leading edge membrane;macromolecular complex;membrane part;organelle part;plasma membrane part;protein complex;ruffle membrane		Acetylation;Actin-binding;Calcium;Cellmembrane;Cellprojection;Completeproteome;Cytoplasm;Cytoskeleton;Membrane;Metal-binding;Phosphoprotein;Referenceproteome;Repeat
Q8BMG7;A0A0A6YWM5;E9QKE4	Q8BMG7;A0A0A6YWM5;E9QKE4	Rab3 GTPase-activating protein non-catalytic subunit	Rab3gap2	24.6381	24.6272	24.9278	24.7872	24.6701	24.7124	24.5847	24.6754	24.6404	24.6781		0.23199	0.62985	-0.0825014	7	7	7	5.2	5.2	5.2	152.53	0	5.7225	1157100000	36	biological regulation;positive regulation of catalytic activity;positive regulation of GTPase activity;positive regulation of hydrolase activity;positive regulation of molecular function;regulation of biological process;regulation of catabolic process;regulation of catalytic activity;regulation of cellular catabolic process;regulation of cellular metabolic process;regulation of cellular process;r…	binding;enzyme activator activity;enzyme regulator activity;GTPase activator activity;GTPase regulator activity;nucleoside-triphosphatase regulator activity;protein binding;protein dimerization activity;protein heterodimerization activity	cell part;cytoplasm;intracellular part;membrane;plasma membrane		Alternativesplicing;Completeproteome;Cytoplasm;GTPaseactivation;Phosphoprotein;Referenceproteome
Q3UJD6;A0A0A6YWN9;E9Q9M5;A0A0A6YWX1;J3KMM1;Q3UJD6-2	Q3UJD6;A0A0A6YWN9;E9Q9M5;A0A0A6YWX1;J3KMM1;Q3UJD6-2	Ubiquitin carboxyl-terminal hydrolase 19;Ubiquitin carboxyl-terminal hydrolase	Usp19	NaN	NaN	NaN	NaN	NaN	NaN	NaN	NaN	NaN	NaN		-4.34294e-08	1	0	2	2	2	2.1	2.1	2.1	150.55	0.0072362	1.2729	352530000	3	biological regulation;catabolic process;cellular catabolic process;cellular macromolecule catabolic process;cellular macromolecule metabolic process;cellular metabolic process;cellular process;cellular protein metabolic process;cellular response to stimulus;cellular response to stress;ER-associated protein catabolic process;macromolecule catabolic process;macromolecule metabolic process;macromole…	binding;catalytic activity;cation binding;cysteine-type peptidase activity;hydrolase activity;hydrolase activity, acting on ester bonds;ion binding;metal ion binding;peptidase activity;peptidase activity, acting on L-amino acid peptides;small conjugating protein-specific protease activity;thiolester hydrolase activity;transition metal ion binding;ubiquitin thiolesterase activity;ubiquitin-specifi…	cell part;cytoplasmic part;cytosol;endoplasmic reticulum membrane;endoplasmic reticulum part;integral to membrane;intracellular organelle part;intracellular part;intrinsic to membrane;membrane;membrane part;organelle membrane;organelle part		Alternativesplicing;Completeproteome;Endoplasmicreticulum;Hydrolase;Membrane;Metal-binding;Protease;Referenceproteome;Repeat;Thiolprotease;Transmembrane;Transmembranehelix;Ublconjugationpathway;Zinc;Zinc-finger
Q9CQ79;A0A0A6YWP9;A0A0A6YXY0	Q9CQ79;A0A0A6YWP9;A0A0A6YXY0	Thioredoxin domain-containing protein 9	Txndc9	NaN	NaN	NaN	NaN	NaN	NaN	NaN	NaN	NaN	NaN		-4.34294e-08	1	0	2	2	2	7.1	7.1	7.1	26.259	0.0074662	1.271	174300000	8	biological regulation;cell redox homeostasis;cellular homeostasis;cellular process;homeostatic process;regulation of biological process;regulation of biological quality;regulation of cellular process		cell part;centrosome;cytoplasm;cytoplasmic part;cytoskeletal part;intracellular membrane-bounded organelle;intracellular non-membrane-bounded organelle;intracellular organelle;intracellular organelle part;intracellular part;membrane-bounded organelle;microtubule organizing center;midbody;non-membrane-bounded organelle;nucleus;organelle;organelle part		Completeproteome;Phosphoprotein;Referenceproteome
Q8BVE3;A0A0A6YX18;A0A0A6YWP6;A0A0A6YVU0;A0A0A6YW86	Q8BVE3;A0A0A6YX18;A0A0A6YWP6	V-type proton ATPase subunit H	Atp6v1h	26.7407	26.3	26.5021	26.8195	26.3475	26.8472	26.5129	26.5973	26.4187	26.436		0.318443	0.458282	0.165805	11	11	11	25.3	25.3	25.3	55.854	0	11.454	3082500000	36	ATP hydrolysis coupled proton transport;cation transport;cellular component organization;cellular component organization or biogenesis;cellular membrane organization;cellular process;endocytosis;energy coupled proton transport, against electrochemical gradient;establishment of localization;hydrogen transport;ion transmembrane transport;ion transport;membrane invagination;membrane organization;mon…	active transmembrane transporter activity;ATPase activity;ATPase activity, coupled;ATPase activity, coupled to movement of substances;ATPase activity, coupled to transmembrane movement of ions;ATPase activity, coupled to transmembrane movement of substances;catalytic activity;cation transmembrane transporter activity;cation-transporting ATPase activity;hydrogen ion transmembrane transporter activ…	cell part;cytoplasmic part;intracellular organelle part;intracellular part;macromolecular complex;membrane part;organelle part;protein complex;proton-transporting two-sector ATPase complex, catalytic domain;proton-transporting V-type ATPase, V1 domain;vacuolar part;vacuolar proton-transporting V-type ATPase, V1 domain	Epithelial cell signaling in Helicobacter pylori infection;ko05152;Lysosome;Oxidative phosphorylation;Phagosome;Rheumatoid arthritis;Vibrio cholerae infection	Completeproteome;Directproteinsequencing;Hydrogeniontransport;Iontransport;Phosphoprotein;Referenceproteome;Transport
Q8VD57;A0A0A6YX21;A0A0A6YY20	Q8VD57;A0A0A6YX21;A0A0A6YY20	Vesicle transport protein SFT2B	Sft2d2	NaN	NaN	NaN	NaN	NaN	NaN	NaN	NaN	NaN	NaN		-4.34294e-08	1	0	1	1	1	6.3	6.3	6.3	17.499	0	12.952	2470600000	9	cellular process;establishment of localization;establishment of protein localization;protein transport;transport;vesicle-mediated transport		cell part;integral to membrane;intrinsic to membrane;membrane part		Completeproteome;Membrane;Phosphoprotein;Proteintransport;Referenceproteome;Transmembrane;Transmembranehelix;Transport
P59481;F6QN75;A0A0A6YX25;D3Z4P2	P59481;F6QN75;A0A0A6YX25;D3Z4P2	VIP36-like protein	Lman2l	25.4624	25.372	25.2404	NaN	25.4717	25.2056	25.463	25.1786	24.765	25.4875		0.0642081	0.882778	-0.0239267	3	3	3	7.8	7.8	7.8	39.881	0.00050865	2.0089	1061300000	18	establishment of localization;establishment of protein localization;protein transport;transport	binding;cation binding;ion binding;metal ion binding	cell part;cytoplasmic part;endoplasmic reticulum membrane;endoplasmic reticulum part;Golgi apparatus;Golgi apparatus part;Golgi membrane;integral to membrane;intracellular membrane-bounded organelle;intracellular organelle;intracellular organelle part;intracellular part;intrinsic to membrane;membrane;membrane part;membrane-bounded organelle;organelle;organelle membrane;organelle part		Completeproteome;Disulfidebond;Endoplasmicreticulum;Glycoprotein;Golgiapparatus;Lectin;Membrane;Metal-binding;Referenceproteome;Signal;Transmembrane;Transmembranehelix
A0A0A6YX73;Q8K1M3;P12367;A0A0A6YY28	A0A0A6YX73;Q8K1M3;P12367	cAMP-dependent protein kinase type II-alpha regulatory subunit	Prkar2a	27.2439	26.9515	26.7969	27.2042	26.9135	26.9978	26.8768	26.9185	27.1146	26.9519		0.12269	0.764201	-0.060153	9	9	8	33.4	33.4	30	43.165	0	58.32	4615100000	61	biological regulation;cellular process;cellular response to stimulus;regulation of biological process;regulation of cellular process;response to stimulus;signal transduction	adenyl nucleotide binding;adenyl ribonucleotide binding;AMP binding;binding;cAMP binding;cAMP-dependent protein kinase regulator activity;catalytic activity;cyclic nucleotide binding;enzyme regulator activity;kinase activity;kinase regulator activity;nucleotide binding;protein kinase regulator activity;purine nucleotide binding;purine ribonucleotide binding;ribonucleotide binding;transferase acti…	cAMP-dependent protein kinase complex;cell part;centrosome;cytoplasm;cytoplasmic part;cytoskeletal part;intracellular non-membrane-bounded organelle;intracellular organelle;intracellular organelle part;intracellular part;macromolecular complex;membrane;microtubule organizing center;non-membrane-bounded organelle;organelle;organelle part;plasma membrane;protein complex	Apoptosis;Insulin signaling pathway	3D-structure;Acetylation;cAMP;cAMP-binding;Cellmembrane;Completeproteome;Cytoplasm;Kinase;Membrane;Nucleotide-binding;Phosphoprotein;Referenceproteome;Repeat;Transferase
Q9QUI0;A0A0A6YXF6;Q9CR99;A0A0A6YWJ1	Q9QUI0;A0A0A6YXF6;Q9CR99	Transforming protein RhoA	Rhoa;4930544G11Rik	29.9498	29.5525	29.5878	29.9792	29.7037	30.0312	29.9098	29.7165	29.8643	29.9383		0.686862	0.189606	0.273808	5	5	2	39.4	39.4	17.6	21.782	0	323.31	36800000000	129	actin cytoskeleton organization;actin filament bundle assembly;actin filament organization;actin filament-based process;anatomical structure development;anatomical structure morphogenesis;androgen receptor signaling pathway;apical junction assembly;biological adhesion;biological regulation;cell adhesion;cell cycle process;cell differentiation;cell junction assembly;cell junction organization;cell…	binding;catalytic activity;GTP binding;GTPase activity;guanyl nucleotide binding;guanyl ribonucleotide binding;hydrolase activity;hydrolase activity, acting on acid anhydrides;hydrolase activity, acting on acid anhydrides, in phosphorus-containing anhydrides;nucleoside-triphosphatase activity;nucleotide binding;purine nucleotide binding;purine ribonucleoside triphosphate binding;purine ribonucleo…	apical junction complex;axon;cell cortex;cell division site part;cell junction;cell part;cell projection;cell projection membrane;cell projection part;cell-cell junction;cleavage furrow;cytoplasmic part;cytoskeleton;cytosol;intracellular;intracellular membrane-bounded organelle;intracellular non-membrane-bounded organelle;intracellular organelle;intracellular part;lamellipodium;leading edge membr…	Adherens junction;Axon guidance;Bacterial invasion of epithelial cells;Chemokine signaling pathway;Colorectal cancer;Endocytosis;Focal adhesion;ko05152;Leukocyte transendothelial migration;Neurotrophin signaling pathway;Pancreatic secretion;Pathogenic Escherichia coli infection;Pathways in cancer;Regulation of actin cytoskeleton;T cell receptor signaling pathway;TGF-beta signaling pathway;Tight j…	3D-structure;Cellcycle;Celldivision;Cellmembrane;Completeproteome;Cytoplasm;Cytoskeleton;GTP-binding;Lipoprotein;Membrane;Methylation;Nucleotide-binding;Phosphoprotein;Prenylation;Proto-oncogene;Referenceproteome;Ublconjugation
A2A8Z1;F6UHR6;E9PXZ2;A0A0A6YXH3;F8VQE8;Q5FWX7;E9Q6C1;A2A8Z1-2	A2A8Z1;F6UHR6;E9PXZ2;A0A0A6YXH3	Oxysterol-binding protein-related protein 9;Oxysterol-binding protein	Osbpl9	NaN	NaN	NaN	NaN	NaN	27.1775	NaN	NaN	NaN	NaN		0	0.972744	NaN	3	3	3	3.8	3.8	3.8	83.108	0.00026991	2.507	3974800000	7	establishment of localization;lipid transport;organic substance transport;transport	binding;lipid binding;phospholipid binding			Acetylation;Alternativesplicing;Completeproteome;Lipid-binding;Lipidtransport;Phosphoprotein;Referenceproteome;Transport
Q9WUE3;A0A0A6YY22	Q9WUE3;A0A0A6YY22	Cytochrome b561 domain-containing protein 2	Cyb561d2	NaN	NaN	NaN	NaN	NaN	NaN	NaN	NaN	NaN	NaN		-4.34294e-08	1	0	1	1	1	5.4	5.4	5.4	24.187	0.0014822	1.738	194150000	2	cellular metabolic process;cellular process;electron transport chain;generation of precursor metabolites and energy;metabolic process;oxidation-reduction process	binding;cation binding;ion binding;metal ion binding	cell part;integral to membrane;intrinsic to membrane;membrane part		Completeproteome;Electrontransport;Heme;Iron;Membrane;Metal-binding;Referenceproteome;Transmembrane;Transmembranehelix;Transport
P13595-2;A0A0A6YY47;E9QB01;P13595;A0A0A6YY91;A0A0A6YWU2;E9Q589;P13595-4;P13595-3	P13595-2;A0A0A6YY47;E9QB01;P13595;A0A0A6YY91	Neural cell adhesion molecule 1	Ncam1	NaN	NaN	NaN	NaN	NaN	NaN	NaN	NaN	NaN	NaN		-4.34294e-08	1	0	3	3	3	4.2	4.2	4.2	93.539	0	2.7923	870480000	12	biological adhesion;biological regulation;cell adhesion;cell projection organization;cell surface receptor linked signaling pathway;cell-cell adhesion;cellular component organization;cellular component organization at cellular level;cellular component organization or biogenesis;cellular component organization or biogenesis at cellular level;cellular process;cellular response to stimulus;homotypic…	binding;carbohydrate binding;glycosaminoglycan binding;heparin binding;pattern binding;polysaccharide binding	anchored to membrane;axon;cell body;cell part;cell projection;cell projection part;external side of plasma membrane;growth cone;integral to membrane;intrinsic to membrane;membrane part;neuron projection;neuronal cell body;plasma membrane part;site of polarized growth	Cell adhesion molecules (CAMs);Prion diseases	3D-structure;Alternativesplicing;Celladhesion;Cellmembrane;Completeproteome;Directproteinsequencing;Disulfidebond;Glycoprotein;GPI-anchor;Heparin-binding;Immunoglobulindomain;Lipoprotein;Membrane;Phosphoprotein;Referenceproteome;Repeat;Signal;Transmembrane;Transmembranehelix
Q64735;A0A0A6YY75;Q64735-2;A0A0A6YVT1;A0A0A6YXN9	Q64735;A0A0A6YY75;Q64735-2;A0A0A6YVT1;A0A0A6YXN9	Complement component receptor 1-like protein	Cr1l	NaN	NaN	NaN	NaN	NaN	NaN	NaN	NaN	NaN	NaN		-4.34294e-08	1	0	2	2	2	6.2	6.2	6.2	53.762	0	2.6626	693510000	7	activation of immune response;biological regulation;chordate embryonic development;complement activation;complement activation, classical pathway;defense response;developmental process;embryo development;embryo development ending in birth or egg hatching;female pregnancy;humoral immune response;immune effector process;immune response;immune system process;in utero embryonic development;innate imm…		cell part;external side of plasma membrane;integral to membrane;intrinsic to membrane;membrane part;plasma membrane part	Complement and coagulation cascades	3D-structure;Alternativesplicing;Complementpathway;Completeproteome;Developmentalprotein;Disulfidebond;Glycoprotein;Immunity;Innateimmunity;Membrane;Phosphoprotein;Pregnancy;Receptor;Referenceproteome;Repeat;Signal;Sushi;Transmembrane;Transmembranehelix
Q9CSN1;A0A0B4J1E2	Q9CSN1;A0A0B4J1E2	SNW domain-containing protein 1	Snw1	NaN	26.431	NaN	NaN	25.7898	25.6107	25.5545	NaN	25.6617	25.9865		0	0.972305	-0.848445	5	5	5	10.6	10.6	10.6	61.475	0	11.116	1783700000	19	biological regulation;biosynthetic process;cell communication;cell differentiation;cellular biosynthetic process;cellular developmental process;cellular macromolecule biosynthetic process;cellular macromolecule metabolic process;cellular metabolic process;cellular nitrogen compound metabolic process;cellular process;cellular response to chemical stimulus;cellular response to external stimulus;cel…	binding;hormone receptor binding;nuclear hormone receptor binding;protein binding;protein binding transcription factor activity;receptor binding;retinoic acid receptor binding;SMAD binding;transcription coactivator activity;transcription cofactor activity;transcription corepressor activity;transcription factor binding;transcription factor binding transcription factor activity;vitamin D receptor b…	cell part;intracellular organelle part;intracellular part;macromolecular complex;nuclear matrix;nuclear part;organelle part;ribonucleoprotein complex;spliceosomal complex	Notch signaling pathway;Spliceosome	Acetylation;Completeproteome;mRNAprocessing;mRNAsplicing;Nucleus;Phosphoprotein;Referenceproteome;Spliceosome;Transcription;Transcriptionregulation
O35343;A0A0B4J1E7;D3YTN1	O35343;A0A0B4J1E7	Importin subunit alpha-3	Kpna4	27.2083	26.913	26.894	27.4153	26.7371	27.9389	27.6482	27.4875	26.8706	27.2993	+	1.72184	0.0133333	0.788476	8	4	4	18	10.6	10.6	57.922	0	65.549	6385100000	62	establishment of localization;establishment of localization in cell;establishment of protein localization;intracellular protein transport;intracellular transport;nuclear import;nuclear transport;nucleocytoplasmic transport;protein import;protein import into nucleus;protein targeting;protein transport;transport	protein transporter activity;substrate-specific transporter activity;transporter activity	cell part;cytoplasm;intracellular membrane-bounded organelle;intracellular organelle;intracellular part;membrane-bounded organelle;nucleus;organelle		Acetylation;Completeproteome;Cytoplasm;Nucleus;Phosphoprotein;Proteintransport;Referenceproteome;Repeat;Transport
Q9Z0M6;A0A0D9SEG8;Q9Z0M6-2;Q9Z0M6-3	Q9Z0M6;A0A0D9SEG8;Q9Z0M6-2;Q9Z0M6-3	CD97 antigen	Cd97;Adgre5	25.7037	25.2837	24.8611	25.3159	NaN	26.5348	26.4914	25.9912	25.0542	26.4221	+	1.52766	0.012466	1.23025	3	3	3	5	5	5	90.412	0	77.625	1193900000	29	biological adhesion;biological regulation;cell adhesion;cell surface receptor linked signaling pathway;cellular process;cellular response to stimulus;G-protein coupled receptor protein signaling pathway;neuropeptide signaling pathway;regulation of biological process;regulation of cellular process;response to stimulus;signal transduction	binding;calcium ion binding;cation binding;G-protein coupled receptor activity;ion binding;metal ion binding;molecular transducer activity;receptor activity;signal transducer activity;signaling receptor activity;transmembrane signaling receptor activity	cell part;integral to membrane;intrinsic to membrane;membrane;membrane part;plasma membrane		Alternativesplicing;Calcium;Celladhesion;Cellmembrane;Completeproteome;Disulfidebond;EGF-likedomain;Glycoprotein;G-proteincoupledreceptor;Membrane;Phosphoprotein;Receptor;Referenceproteome;Repeat;Signal;Transducer;Transmembrane;Transmembranehelix
Q8BVA5;A0A0F6AIX6;A0A0F6AIX5;Q8BVA5-2	Q8BVA5;A0A0F6AIX6;A0A0F6AIX5;Q8BVA5-2	UPF0554 protein C2orf43 homolog		NaN	NaN	NaN	NaN	NaN	NaN	NaN	NaN	NaN	23.4645		-4.34294e-08	1	0	1	1	1	4	4	4	37.374	0	3.2082	437860000	15					Alternativesplicing;Completeproteome;Referenceproteome
Q6PHZ2;Q6PHZ2-5;A0A0G2JDC1;E9Q1V9;E9Q1T1;A0A0G2JGS4;Q6PHZ2-2;Q6PHZ2-4;Q8CCM0;E9Q1W0;E9QAJ4;D6RDQ8;F6ZIE1;E9PYZ8;E9PXV3;F6RWZ9;F7A856	Q6PHZ2;Q6PHZ2-5;A0A0G2JDC1;E9Q1V9;E9Q1T1;A0A0G2JGS4;Q6PHZ2-2;Q6PHZ2-4;Q8CCM0;E9Q1W0	Calcium/calmodulin-dependent protein kinase type II subunit delta	Camk2d	27.5598	27.2059	27.5104	27.8348	27.1854	27.4508	27.6761	27.9268	27.7411	27.7399		0.331858	0.476186	0.138101	8	5	5	20.8	13.2	13.2	56.369	0	143.59	5460300000	53	biological regulation;calcium ion transport;cardiac muscle contraction;cation transport;cell cycle process;cellular macromolecule metabolic process;cellular metabolic process;cellular process;cellular protein metabolic process;divalent inorganic cation transport;divalent metal ion transport;establishment of localization;G1/S transition of mitotic cell cycle;ion transport;macromolecule metabolic p…	adenyl nucleotide binding;adenyl ribonucleotide binding;ATP binding;binding;calmodulin-dependent protein kinase activity;catalytic activity;kinase activity;nucleotide binding;phosphotransferase activity, alcohol group as acceptor;protein kinase activity;protein serine/threonine kinase activity;purine nucleotide binding;purine ribonucleoside triphosphate binding;purine ribonucleotide binding;ribon…	axon part;calcium- and calmodulin-dependent protein kinase complex;cell body;cell junction;cell part;cell projection part;cell-cell contact zone;cell-cell junction;cytoplasm;cytoplasmic part;endoplasmic reticulum membrane;endoplasmic reticulum part;initial segment;intercalated disc;intracellular membrane-bounded organelle;intracellular organelle;intracellular organelle part;intracellular part;mac…	Calcium signaling pathway;ErbB signaling pathway;Gastric acid secretion;Glioma;GnRH signaling pathway;ko05152;Long-term potentiation;Melanogenesis;Neurotrophin signaling pathway;Olfactory transduction;Oocyte meiosis;Phototransduction - fly;Wnt signaling pathway	Acetylation;Alternativesplicing;ATP-binding;Calmodulin-binding;Cellmembrane;Completeproteome;Kinase;Membrane;Nucleotide-binding;Phosphoprotein;Referenceproteome;Sarcoplasmicreticulum;Serine/threonine-proteinkinase;Transferase
Q8BTZ4;A0A0G2JFH0;A0A0G2JDE8;A0A0G2JE03;Q3UFC2;Q3TWF7;A0A0G2JDM7;Q8BTZ4-2;A0A0G2JG78;A0A0G2JF12	Q8BTZ4;A0A0G2JFH0;A0A0G2JDE8;A0A0G2JE03;Q3UFC2;Q3TWF7;A0A0G2JDM7;Q8BTZ4-2;A0A0G2JG78;A0A0G2JF12	Anaphase-promoting complex subunit 5	Anapc5	NaN	NaN	NaN	NaN	NaN	NaN	NaN	NaN	NaN	NaN		-4.34294e-08	1	0	2	2	2	3.8	3.8	3.8	83.097	0	3.7955	445750000	6	cell cycle phase;cell cycle process;cell division;cellular component organization;cellular component organization at cellular level;cellular component organization or biogenesis;cellular component organization or biogenesis at cellular level;cellular macromolecule metabolic process;cellular metabolic process;cellular process;cellular protein metabolic process;macromolecule metabolic process;macro…		anaphase-promoting complex;cell part;cullin-RING ubiquitin ligase complex;intracellular organelle part;intracellular part;macromolecular complex;nuclear part;nuclear ubiquitin ligase complex;organelle part;protein complex;ubiquitin ligase complex	Cell cycle;Cell cycle - yeast;Meiosis - yeast;Oocyte meiosis;Progesterone-mediated oocyte maturation;Ubiquitin mediated proteolysis	Alternativesplicing;Cellcycle;Celldivision;Completeproteome;Mitosis;Phosphoprotein;Referenceproteome;Repeat;TPRrepeat;Ublconjugationpathway
Q9DAI2;A0A0G2JDJ1	Q9DAI2;A0A0G2JDJ1	Intraflagellar transport protein 22 homolog	Ift22	NaN	NaN	NaN	NaN	NaN	NaN	NaN	NaN	NaN	NaN		-4.34294e-08	1	0	1	1	1	7.6	7.6	7.6	20.833	0.0091408	1.1437	271820000	1	biological regulation;cellular process;cellular response to stimulus;intracellular signal transduction;regulation of biological process;regulation of cellular process;response to stimulus;signal transduction;small GTPase mediated signal transduction	binding;GTP binding;guanyl nucleotide binding;guanyl ribonucleotide binding;nucleotide binding;purine nucleotide binding;purine ribonucleoside triphosphate binding;purine ribonucleotide binding;ribonucleotide binding			Completeproteome;GTP-binding;Nucleotide-binding;Referenceproteome
Q91WK0;A0A0G2JDR6;E9QN52;A0A0G2JEP4;A0A0G2JFV5;Q91WK0-2;A0A0G2JGZ1	Q91WK0;A0A0G2JDR6;E9QN52;A0A0G2JEP4;A0A0G2JFV5;Q91WK0-2;A0A0G2JGZ1	Leucine-rich repeat flightless-interacting protein 2	Lrrfip2	NaN	NaN	NaN	NaN	NaN	NaN	NaN	NaN	NaN	NaN		-4.34294e-08	1	0	2	2	2	5.3	5.3	5.3	47.147	0.0012407	1.7785	301130000	4	biological regulation;cell surface receptor linked signaling pathway;cellular process;cellular response to stimulus;regulation of biological process;regulation of cellular process;response to stimulus;signal transduction;Wnt receptor signaling pathway				Alternativesplicing;Coiledcoil;Completeproteome;Phosphoprotein;Referenceproteome;Wntsignalingpathway
A0A0G2JDV9	A0A0G2JDV9			NaN	NaN	NaN	NaN	NaN	NaN	NaN	NaN	NaN	NaN		-4.34294e-08	1	0	5	1	1	71.8	16.7	16.7	8.5637	0.0024184	1.5784	196110000	3
P09542;A0A0G2JDW2;A0A0G2JDM3	P09542;A0A0G2JDW2;A0A0G2JDM3	Myosin light chain 3	Myl3	NaN	NaN	NaN	NaN	NaN	NaN	NaN	NaN	NaN	NaN		-4.34294e-08	1	0	6	5	5	30.9	27	27	22.421	0	43.324	1185000000	16	anatomical structure development;anatomical structure morphogenesis;biological regulation;cardiac muscle contraction;cardiac muscle tissue morphogenesis;developmental process;multicellular organismal process;muscle contraction;muscle system process;muscle tissue development;muscle tissue morphogenesis;regulation of biological process;regulation of biological quality;regulation of heart contractio…	binding;calcium ion binding;catalytic activity;cation binding;hydrolase activity;hydrolase activity, acting on acid anhydrides;hydrolase activity, acting on acid anhydrides, in phosphorus-containing anhydrides;ion binding;metal ion binding;motor activity;nucleoside-triphosphatase activity;pyrophosphatase activity	A band;cell part;contractile fiber part;cytoplasmic part;cytoskeletal part;I band;intracellular organelle part;intracellular part;macromolecular complex;myosin complex;organelle part;protein complex	Cardiac muscle contraction;Dilated cardiomyopathy;Hypertrophic cardiomyopathy (HCM)	Completeproteome;Methylation;Motorprotein;Muscleprotein;Myosin;Referenceproteome;Repeat
Q6ZWU9;A0A0G2JDW7;A0A0G2JG29;A0A0G2JEX7	Q6ZWU9;A0A0G2JDW7;A0A0G2JG29	40S ribosomal protein S27	Rps27	27.8254	27.8234	27.692	27.5483	27.5057	28.5964	28.2527	28.3686	27.8083	28.1468	+	1.71325	0.0156162	0.644276	3	3	1	38.1	38.1	13.1	9.461	0	34.325	13711000000	65	biosynthetic process;cellular biosynthetic process;cellular macromolecule biosynthetic process;cellular macromolecule metabolic process;cellular metabolic process;cellular process;cellular protein metabolic process;macromolecule biosynthetic process;macromolecule metabolic process;metabolic process;primary metabolic process;protein metabolic process;translation	binding;cation binding;ion binding;metal ion binding;structural constituent of ribosome;structural molecule activity	cell part;cytosolic small ribosomal subunit;intracellular membrane-bounded organelle;intracellular organelle;intracellular organelle part;intracellular part;macromolecular complex;membrane-bounded organelle;nucleus;organelle;organelle part;ribonucleoprotein complex;small ribosomal subunit	Ribosome	Completeproteome;Metal-binding;Phosphoprotein;Referenceproteome;Ribonucleoprotein;Ribosomalprotein;Zinc;Zinc-finger
Q99NH0;E9Q804;E9QKG6;A0A0G2JDZ9;Q99NH0-2;Q99NH0-3;E9PUR0;F7C545;E9Q1M6	Q99NH0;E9Q804;E9QKG6;A0A0G2JDZ9;Q99NH0-2;Q99NH0-3	Ankyrin repeat domain-containing protein 17	Ankrd17	NaN	NaN	NaN	NaN	NaN	NaN	NaN	NaN	NaN	NaN		-4.34294e-08	1	0	4	4	4	1.6	1.6	1.6	274.21	0	4.7519	596900000	14	anatomical structure development;anatomical structure maturation;biological regulation;blood vessel maturation;developmental maturation;developmental process;endoderm development;negative regulation of biological process;negative regulation of cell differentiation;negative regulation of cellular process;negative regulation of developmental process;negative regulation of muscle cell differentiatio…	binding;nucleic acid binding;RNA binding	cell part;cytoplasm;intracellular membrane-bounded organelle;intracellular organelle;intracellular part;membrane-bounded organelle;nucleus;organelle		Alternativesplicing;ANKrepeat;Coiledcoil;Completeproteome;Cytoplasm;Nucleus;Phosphoprotein;Referenceproteome;Repeat;RNA-binding
Q6DFX2;A0A0G2JE26	Q6DFX2;A0A0G2JE26	Anthrax toxin receptor 2	Antxr2	24.4856	24.4484	NaN	24.3778	NaN	24.7273	24.8483	24.4924	24.4598	24.6757	+	1.43428	0.0616743	0.320825	3	3	3	6.8	6.8	6.8	53.184	0	23.828	1325200000	35	reproductive process	binding;cation binding;ion binding;metal ion binding;receptor activity	cell part;integral to membrane;intrinsic to membrane;membrane part		Completeproteome;Disulfidebond;Glycoprotein;Membrane;Metal-binding;Phosphoprotein;Receptor;Referenceproteome;Signal;Transmembrane;Transmembranehelix
P61079;Q6ZWY6;P62838;A0A0G2JE32;A0A0G2JGL0	P61079;Q6ZWY6;P62838;A0A0G2JE32;A0A0G2JGL0	Ubiquitin-conjugating enzyme E2 D3;Ubiquitin-conjugating enzyme E2 D2B;Ubiquitin-conjugating enzyme E2 D2	Ube2d3;Ube2d2b;Ube2d2	NaN	NaN	NaN	NaN	NaN	NaN	NaN	NaN	NaN	NaN		-4.34294e-08	1	0	1	1	1	7.5	7.5	7.5	16.687	0.00051086	2.0395	4707100000	13	apoptosis;catabolic process;cell death;cellular catabolic process;cellular macromolecule catabolic process;cellular macromolecule metabolic process;cellular metabolic process;cellular nitrogen compound metabolic process;cellular process;cellular protein metabolic process;cellular response to stimulus;cellular response to stress;death;DNA metabolic process;DNA repair;macromolecule catabolic proces…	acid-amino acid ligase activity;adenyl nucleotide binding;adenyl ribonucleotide binding;ATP binding;binding;catalytic activity;ligase activity;ligase activity, forming carbon-nitrogen bonds;nucleotide binding;purine nucleotide binding;purine ribonucleoside triphosphate binding;purine ribonucleotide binding;ribonucleotide binding;small conjugating protein ligase activity;ubiquitin-protein ligase a…	cell part;cytoplasmic part;endosomal part;endosome membrane;intracellular organelle part;intracellular part;membrane;organelle membrane;organelle part;plasma membrane	Protein processing in endoplasmic reticulum;Ubiquitin mediated proteolysis	Apoptosis;ATP-binding;Cellmembrane;Completeproteome;Disulfidebond;DNAdamage;DNArepair;Endosome;Ligase;Membrane;Nucleotide-binding;Referenceproteome;Ublconjugationpathway
Q6ZPS6;A0A0G2JEA0	Q6ZPS6;A0A0G2JEA0	Ankyrin repeat and IBR domain-containing protein 1	Ankib1	NaN	NaN	NaN	NaN	NaN	NaN	NaN	NaN	NaN	NaN		-4.34294e-08	1	0	1	1	1	0.9	0.9	0.9	121.87	0.0091387	1.1436	7962100000	1		binding;cation binding;ion binding;metal ion binding;transition metal ion binding;zinc ion binding			ANKrepeat;Coiledcoil;Completeproteome;Lipoprotein;Metal-binding;Myristate;Phosphoprotein;Referenceproteome;Repeat;Zinc;Zinc-finger
Q8VD66;A0A0G2JEC8;Q8C0M2;Q3U7M5	Q8VD66;A0A0G2JEC8;Q8C0M2;Q3U7M5	Abhydrolase domain-containing protein 4	Abhd4	NaN	NaN	NaN	NaN	NaN	NaN	NaN	NaN	NaN	NaN		-4.34294e-08	1	0	1	1	1	3.5	3.5	3.5	38.86	0	4.411	259020000	23	catabolic process;lipid catabolic process;lipid metabolic process;metabolic process;primary metabolic process	catalytic activity;hydrolase activity			Completeproteome;Hydrolase;Lipiddegradation;Lipidmetabolism;Referenceproteome
A0A0G2JEG0;A0A0G2JFX8;D3YV77;Q3UEB4;Q9R008	A0A0G2JEG0;A0A0G2JFX8;D3YV77;Q3UEB4;Q9R008	Mevalonate kinase	Mvk	NaN	NaN	NaN	NaN	NaN	NaN	NaN	NaN	NaN	NaN		-4.34294e-08	1	0	1	1	1	4.9	4.9	4.9	24.415	0.00052466	2.243	191300000	7	acetyl-CoA metabolic process;alcohol metabolic process;biological regulation;biosynthetic process;cellular biosynthetic process;cellular lipid metabolic process;cellular metabolic process;cellular process;cholesterol biosynthetic process;cholesterol metabolic process;coenzyme metabolic process;cofactor metabolic process;isopentenyl diphosphate biosynthetic process;isopentenyl diphosphate biosynth…	adenyl nucleotide binding;adenyl ribonucleotide binding;ATP binding;binding;catalytic activity;kinase activity;mevalonate kinase activity;nucleotide binding;phosphotransferase activity, alcohol group as acceptor;purine nucleotide binding;purine ribonucleoside triphosphate binding;purine ribonucleotide binding;ribonucleotide binding;transferase activity;transferase activity, transferring phosphoru…	cell part;cytoplasm;cytoplasmic part;cytosol;intracellular part	Peroxisome;Terpenoid backbone biosynthesis	ATP-binding;Cholesterolbiosynthesis;Cholesterolmetabolism;Completeproteome;Cytoplasm;Kinase;Lipidbiosynthesis;Lipidmetabolism;Nucleotide-binding;Referenceproteome;Steroidbiosynthesis;Steroidmetabolism;Sterolbiosynthesis;Sterolmetabolism;Transferase
Q8VE96;A0A0G2JEG3	Q8VE96;A0A0G2JEG3	Solute carrier family 35 member F6	Slc35f6	NaN	NaN	NaN	NaN	NaN	NaN	NaN	NaN	NaN	NaN		-4.34294e-08	1	0	1	1	1	2.7	2.7	2.7	40.978	0.00050891	2.0152	656290000	19	biological regulation;establishment of localization;positive regulation of biological process;positive regulation of cell proliferation;positive regulation of cellular process;regulation of biological process;regulation of cell proliferation;regulation of cellular process;transport		cell part;cytoplasmic part;Golgi apparatus;integral to membrane;intracellular membrane-bounded organelle;intracellular organelle;intracellular organelle part;intracellular part;intrinsic to membrane;lysosomal membrane;membrane;membrane part;membrane-bounded organelle;mitochondrion;nucleus;organelle;organelle membrane;organelle part;vacuolar membrane;vacuolar part		Completeproteome;Glycoprotein;Lysosome;Membrane;Mitochondrion;Phosphoprotein;Referenceproteome;Signal;Transmembrane;Transmembranehelix;Transport
P63254;A0A0G2JEK2	P63254;A0A0G2JEK2	Cysteine-rich protein 1	Crip1	34.3845	34.1684	34.1981	33.594	33.9861	34.0954	33.496	33.8898	33.568	33.7303		0.81169	0.108392	-0.454684	4	4	4	48.1	48.1	48.1	8.5497	0	142.64	365040000000	109	biological regulation;cellular process;cellular response to abiotic stimulus;cellular response to antibiotic;cellular response to chemical stimulus;cellular response to light stimulus;cellular response to radiation;cellular response to stimulus;cellular response to stress;cellular response to UV;cellular response to UV-B;DNA damage response, signal transduction resulting in induction of apoptosis…	AT DNA binding;binding;cation binding;DNA bending activity;DNA binding;ion binding;metal ion binding;nucleic acid binding;peptide binding;sequence-specific DNA binding;transition metal ion binding;zinc ion binding	cell part;cytoplasm;intracellular part		Acetylation;Completeproteome;LIMdomain;Metal-binding;Referenceproteome;Zinc
Q8CGF1;A0A0G2JEL5;A0A0G2JEY0;Q8CGF1-2	Q8CGF1;A0A0G2JEL5;A0A0G2JEY0;Q8CGF1-2	Rho GTPase-activating protein 29	Arhgap29	NaN	NaN	NaN	NaN	NaN	NaN	NaN	NaN	NaN	23.3499		-4.34294e-08	1	0	1	1	1	1.3	1.3	1.3	142.34	0.0074332	1.2459	76022000	1	biological regulation;cellular process;cellular response to stimulus;intracellular signal transduction;positive regulation of catalytic activity;positive regulation of GTPase activity;positive regulation of hydrolase activity;positive regulation of molecular function;regulation of biological process;regulation of catabolic process;regulation of catalytic activity;regulation of cellular catabolic …	binding;cation binding;enzyme activator activity;enzyme regulator activity;GTPase activator activity;GTPase regulator activity;ion binding;metal ion binding;nucleoside-triphosphatase regulator activity	cell part;intracellular		Alternativesplicing;Coiledcoil;Completeproteome;GTPaseactivation;Metal-binding;Phosphoprotein;Referenceproteome;Zinc;Zinc-finger
Q62159;A0A0G2JEP8;H3BL56	Q62159;A0A0G2JEP8;H3BL56	Rho-related GTP-binding protein RhoC	Rhoc	NaN	NaN	NaN	NaN	NaN	NaN	NaN	NaN	NaN	NaN		-4.34294e-08	1	0	4	1	1	34.2	12.4	12.4	22.006	0	28.146	826130000	11	apical junction assembly;biological regulation;cell junction assembly;cell junction organization;cell-cell junction assembly;cell-cell junction organization;cellular component assembly;cellular component assembly at cellular level;cellular component organization;cellular component organization at cellular level;cellular component organization or biogenesis;cellular component organization or bioge…	binding;GTP binding;guanyl nucleotide binding;guanyl ribonucleotide binding;molecular transducer activity;nucleotide binding;purine nucleotide binding;purine ribonucleoside triphosphate binding;purine ribonucleotide binding;ribonucleotide binding;signal transducer activity	cell division site part;cell part;cleavage furrow;cytoplasmic part;cytosol;intracellular membrane-bounded organelle;intracellular organelle;intracellular part;membrane;membrane-bounded organelle;nucleus;organelle;plasma membrane		Cellmembrane;Completeproteome;GTP-binding;Lipoprotein;Membrane;Methylation;Nucleotide-binding;Phosphoprotein;Prenylation;Referenceproteome
O54946;O54946-2;A0A0G2JER9;G3X8S5;A0A0G2JGN9;A0A0G2JEI3;Q9QYI5;Q3TB24;Q9QYI8;A0A087WP03;F6YRQ2;Q9QYI5-2	O54946;O54946-2;A0A0G2JER9;G3X8S5;A0A0G2JGN9;A0A0G2JEI3	DnaJ homolog subfamily B member 6	Dnajb6	26.0905	NaN	26.2374	25.7079	NaN	25.7731	25.7816	NaN	26.2068	25.6452	+	1.46399	0.0431095	-0.386585	3	3	3	7.9	7.9	7.9	39.807	0	3.0367	1347900000	21	actin cytoskeleton organization;actin filament-based process;anatomical structure development;biological adhesion;biological regulation;catabolic process;cell adhesion;cell differentiation;cell differentiation involved in embryonic placenta development;cell-cell adhesion;cellular catabolic process;cellular component organization;cellular component organization at cellular level;cellular component…	ATPase activator activity;ATPase regulator activity;binding;DNA binding;enzyme activator activity;enzyme regulator activity;nucleic acid binding;nucleoside-triphosphatase regulator activity	cell part;contractile fiber part;cytoplasm;cytoplasmic part;inclusion body;intracellular membrane-bounded organelle;intracellular organelle;intracellular part;macromolecular complex;membrane-bounded organelle;nucleus;organelle;organelle part;perinuclear region of cytoplasm;proteasome complex;protein complex;Z disc	Protein processing in endoplasmic reticulum	Alternativesplicing;Chaperone;Completeproteome;Cytoplasm;Nucleus;Referenceproteome;Repeat
A0A0G2JEV2;O35216;A0A0G2JGI2	A0A0G2JEV2;O35216;A0A0G2JGI2	Histone H3-like centromeric protein A	Cenpa	NaN	NaN	NaN	NaN	24.1334	NaN	NaN	NaN	NaN	NaN		-4.34294e-08	1	0	3	3	3	27.7	27.7	27.7	15.013	0	5.6157	281010000	11	cell cycle process;cellular component assembly;cellular component assembly at cellular level;cellular component organization;cellular component organization at cellular level;cellular component organization or biogenesis;cellular component organization or biogenesis at cellular level;cellular localization;cellular macromolecular complex assembly;cellular macromolecular complex subunit organizatio…	binding;DNA binding;nucleic acid binding	cell part;chromosomal part;condensed chromosome inner kinetochore;condensed chromosome kinetochore;condensed nuclear chromosome kinetochore;intracellular non-membrane-bounded organelle;intracellular organelle;intracellular organelle part;intracellular part;kinetochore;macromolecular complex;non-membrane-bounded organelle;nuclear chromosome part;nuclear part;nucleosome;organelle;organelle part;pro…		ADP-ribosylation;Centromere;Chromosome;Completeproteome;DNA-binding;Kinetochore;Nucleosomecore;Nucleus;Phosphoprotein;Referenceproteome
Q80SY5;A0A0G2JEW4	Q80SY5;A0A0G2JEW4	Pre-mRNA-splicing factor 38B	Prpf38b	NaN	NaN	NaN	NaN	NaN	NaN	NaN	NaN	NaN	NaN		-4.34294e-08	1	0	1	1	1	1.7	1.7	1.7	63.752	0.0024231	1.5926	468890000	3	cellular macromolecule metabolic process;cellular metabolic process;cellular nitrogen compound metabolic process;cellular process;macromolecule metabolic process;metabolic process;mRNA metabolic process;mRNA processing;nitrogen compound metabolic process;nucleic acid metabolic process;nucleobase-containing compound metabolic process;primary metabolic process;RNA metabolic process;RNA processing;R…		cell part;intracellular organelle part;intracellular part;macromolecular complex;nuclear part;organelle part;ribonucleoprotein complex;spliceosomal complex	Spliceosome	Acetylation;Coiledcoil;Completeproteome;mRNAprocessing;mRNAsplicing;Nucleus;Phosphoprotein;Referenceproteome;Spliceosome
Q7TPW1;A0A0G2JEX1;A0A0G2JG59;A0A0G2JFD8;A0A0G2JGI1;A0A0G2JDZ8;A0A0G2JDY6;A0A0G2JDZ3;A0A0G2JFI0;A0A0G2JFT2	Q7TPW1;A0A0G2JEX1;A0A0G2JG59;A0A0G2JFD8;A0A0G2JGI1	Nexilin	Nexn	27.7427	27.5955	27.764	26.6407	27.1843	27.5511	27.0087	27.4642	26.8623	27.1832		0.844171	0.108419	-0.42082	7	7	7	10.5	10.5	10.5	72.107	0	11.795	3229600000	29	biological regulation;regulation of biological process;regulation of cell migration;regulation of cell motility;regulation of cellular component movement;regulation of cellular component organization;regulation of cellular process;regulation of cytoskeleton organization;regulation of localization;regulation of locomotion;regulation of organelle organization	structural constituent of muscle;structural molecule activity	adherens junction;anchoring junction;cell junction;cell part;cell-substrate adherens junction;cell-substrate junction;contractile fiber part;cytoplasmic part;cytoskeleton;intracellular non-membrane-bounded organelle;intracellular organelle;intracellular part;non-membrane-bounded organelle;organelle;organelle part;Z disc		Actin-binding;Celljunction;Completeproteome;Cytoplasm;Cytoskeleton;Immunoglobulindomain;Phosphoprotein;Referenceproteome
Q8R344;A0A0G2JFK6;A0A0G2JF16	Q8R344;A0A0G2JFK6;A0A0G2JF16	Coiled-coil domain-containing protein 12	Ccdc12	NaN	NaN	NaN	NaN	NaN	NaN	NaN	NaN	NaN	NaN		-4.34294e-08	1	0	1	1	1	13.9	13.9	13.9	18.891	0	48.032	328970000	7				Spliceosome	Acetylation;Coiledcoil;Completeproteome;Phosphoprotein;Referenceproteome
Q9R0Q6;A0A0G2JF52;D3YVI5	Q9R0Q6;A0A0G2JF52;D3YVI5	Actin-related protein 2/3 complex subunit 1A	Arpc1a	26.3642	26.3756	26.4913	26.2264	26.4125	26.0806	NaN	26.6179	26.2118	25.9974		0	0.971867	-0.329699	6	5	5	16.5	16.5	16.5	41.626	0	3.1435	1239800000	13	biological regulation;cellular component organization;cellular component organization or biogenesis;regulation of actin cytoskeleton organization;regulation of actin filament length;regulation of actin filament polymerization;regulation of actin filament-based process;regulation of actin polymerization or depolymerization;regulation of anatomical structure size;regulation of biological process;re…		Arp2/3 protein complex;cell part;cytoplasm;cytoskeletal part;intracellular organelle part;intracellular part;macromolecular complex;organelle part;protein complex	Bacterial invasion of epithelial cells;Fc gamma R-mediated phagocytosis;Pathogenic Escherichia coli infection;Regulation of actin cytoskeleton;Shigellosis	Actin-binding;Completeproteome;Cytoplasm;Cytoskeleton;Directproteinsequencing;Referenceproteome;Repeat;WDrepeat
Q3V1D3;A0A0G2JFD4	Q3V1D3;A0A0G2JFD4	AMP deaminase 1	Ampd1	NaN	NaN	NaN	NaN	NaN	NaN	25.6546	25.6652	26.664	26.0915		0	0.971429	NaN	3	3	3	4.2	4.2	4.2	86.104	0	4.7817	1142000000	18	biosynthetic process;cellular biosynthetic process;cellular metabolic compound salvage;cellular metabolic process;cellular nitrogen compound biosynthetic process;cellular nitrogen compound metabolic process;cellular process;heterocycle biosynthetic process;heterocycle metabolic process;IMP biosynthetic process;IMP metabolic process;IMP salvage;metabolic process;nitrogen compound metabolic process…	AMP deaminase activity;binding;catalytic activity;cation binding;deaminase activity;hydrolase activity;hydrolase activity, acting on carbon-nitrogen (but not peptide) bonds;hydrolase activity, acting on carbon-nitrogen (but not peptide) bonds, in cyclic amidines;ion binding;metal ion binding			Completeproteome;Hydrolase;Metal-binding;Nucleotidemetabolism;Referenceproteome;Zinc
Q7TPD0;A0A0G2JFJ6;Q7TPD0-2	Q7TPD0;A0A0G2JFJ6;Q7TPD0-2	Integrator complex subunit 3	Ints3	NaN	NaN	NaN	NaN	NaN	NaN	NaN	NaN	NaN	NaN		-4.34294e-08	1	0	2	2	2	2	2	2	117.94	0.00125	1.8385	277480000	4	biological regulation;cell cycle checkpoint;cellular macromolecule metabolic process;cellular metabolic process;cellular nitrogen compound metabolic process;cellular process;cellular response to stimulus;cellular response to stress;DNA metabolic process;DNA repair;macromolecule metabolic process;metabolic process;ncRNA metabolic process;ncRNA processing;nitrogen compound metabolic process;nucleic…		cell part;integrator complex;intracellular organelle part;intracellular part;macromolecular complex;nuclear part;nucleoplasm part;organelle part;protein complex;SOSS complex		Alternativesplicing;Completeproteome;DNAdamage;DNArepair;Nucleus;Phosphoprotein;Referenceproteome
Q9D394-2;Q9D394;Q9D394-3;Q9D394-4;A0A0G2JFT8	Q9D394-2;Q9D394;Q9D394-3;Q9D394-4;A0A0G2JFT8	Protein RUFY3	Rufy3	24.8064	NaN	NaN	24.7549	NaN	23.9645	NaN	NaN	NaN	NaN		0	0.970991	-0.841959	3	3	3	5.3	5.3	5.3	74.401	0	3.2703	487100000	11	biological regulation;negative regulation of axonogenesis;negative regulation of biological process;negative regulation of cell development;negative regulation of cell differentiation;negative regulation of cell projection organization;negative regulation of cellular component organization;negative regulation of cellular process;negative regulation of developmental process;negative regulation of …		cell part;cell projection;cell projection part;filopodium;growth cone;site of polarized growth		3D-structure;Alternativesplicing;Cellprojection;Coiledcoil;Completeproteome;Developmentalprotein;Differentiation;Neurogenesis;Phosphoprotein;Referenceproteome
Q9JHI7;A0A0G2JFV9	Q9JHI7;A0A0G2JFV9	Exosome complex component RRP45	Exosc9	NaN	NaN	NaN	NaN	NaN	NaN	NaN	NaN	NaN	NaN		-4.34294e-08	1	0	2	2	2	5.5	5.5	5.5	48.936	0.0065743	1.3001	1268200000	5	biological regulation;catabolic process;cellular catabolic process;cellular macromolecule catabolic process;cellular macromolecule metabolic process;cellular metabolic process;cellular nitrogen compound metabolic process;cellular process;exonucleolytic nuclear-transcribed mRNA catabolic process involved in deadenylation-dependent decay;macromolecule catabolic process;macromolecule metabolic proce…	AU-rich element binding;binding;catalytic activity;exonuclease activity;hydrolase activity;hydrolase activity, acting on ester bonds;nuclease activity;nucleic acid binding;RNA binding	cell part;cytoplasm;exosome (RNase complex);intracellular non-membrane-bounded organelle;intracellular organelle;intracellular organelle part;intracellular part;macromolecular complex;non-membrane-bounded organelle;nuclear part;nucleolus;organelle;organelle part;protein complex	RNA degradation	Acetylation;Completeproteome;Cytoplasm;Exonuclease;Exosome;Hydrolase;Nuclease;Nucleus;Phosphoprotein;Referenceproteome;RNA-binding;rRNAprocessing
Q91WJ8;Q3TUE1;A0A0G2JGW9;A0A0G2JFY5;Q3UUU2;A0A0G2JG00;Q91WJ8-2;A0A0G2JFK2;A0A0G2JGV9;A0A0G2JG96	Q91WJ8;Q3TUE1;A0A0G2JGW9;A0A0G2JFY5;Q3UUU2;A0A0G2JG00;Q91WJ8-2	Far upstream element-binding protein 1	Fubp1	27.7763	28.0146	27.8413	27.7738	27.8154	28.6492	28.293	28.1661	28.0016	28.2178	+	1.45832	0.0261224	0.593712	12	10	10	20.9	18.6	18.6	68.539	0	48	10262000000	124	biological regulation;biosynthetic process;cellular biosynthetic process;cellular macromolecule biosynthetic process;cellular macromolecule metabolic process;cellular metabolic process;cellular nitrogen compound metabolic process;cellular process;macromolecule biosynthetic process;macromolecule metabolic process;metabolic process;nitrogen compound metabolic process;nucleic acid metabolic process;…	binding;DNA binding;nucleic acid binding;RNA binding	cell part;intracellular membrane-bounded organelle;intracellular organelle;intracellular part;membrane-bounded organelle;nucleus;organelle		3D-structure;Acetylation;Alternativesplicing;Completeproteome;Directproteinsequencing;DNA-binding;Nucleus;Phosphoprotein;Referenceproteome;Repeat;Transcription;Transcriptionregulation;Ublconjugation
Q6P9Z1;A0A0G2JG60;Q61466;Q61466-2	Q6P9Z1;A0A0G2JG60	SWI/SNF-related matrix-associated actin-dependent regulator of chromatin subfamily D member 3	Smarcd3	NaN	NaN	NaN	NaN	NaN	NaN	NaN	NaN	NaN	NaN		-4.34294e-08	1	0	3	2	2	7	4.6	4.6	54.985	0	3.0395	200650000	7	anatomical structure development;anatomical structure formation involved in morphogenesis;biological regulation;biosynthetic process;cardiac chamber formation;cardiac right ventricle formation;cardiac ventricle formation;cell differentiation;cellular biosynthetic process;cellular component disassembly;cellular component disassembly at cellular level;cellular component organization;cellular compon…	ligand-dependent nuclear receptor transcription coactivator activity;protein binding transcription factor activity;transcription coactivator activity;transcription cofactor activity;transcription factor binding transcription factor activity	cell part;chromatin;chromatin remodeling complex;chromosomal part;cytoplasm;intracellular organelle part;intracellular part;macromolecular complex;nBAF complex;npBAF complex;nuclear chromatin;nuclear chromosome part;nuclear part;organelle part;protein complex;SWI/SNF complex;SWI/SNF-type complex		3D-structure;Alternativesplicing;Chromatinregulator;Coiledcoil;Completeproteome;Directproteinsequencing;Neurogenesis;Nucleus;Phosphoprotein;Referenceproteome;Transcription;Transcriptionregulation
P07091;A0A0G2JGD2	P07091;A0A0G2JGD2	Protein S100-A4	S100a4	31.3609	31.3301	31.4629	31.6847	31.8271	31.8353	31.7525	31.7536	32.0119	31.9128	+	2.18387	0.0194693	0.409245	6	6	6	42.6	42.6	42.6	11.721	0	95.21	118630000000	64	biological regulation;positive regulation of biological process;positive regulation of cell communication;positive regulation of cellular process;positive regulation of I-kappaB kinase/NF-kappaB cascade;positive regulation of intracellular protein kinase cascade;positive regulation of response to stimulus;positive regulation of signal transduction;positive regulation of signaling;regulation of bi…	binding;calcium ion binding;cation binding;ion binding;metal ion binding	cell part;cell projection;cytoplasmic part;intracellular membrane-bounded organelle;intracellular organelle;intracellular part;membrane-bounded organelle;neuron projection;nucleus;organelle;perinuclear region of cytoplasm		Acetylation;Calcium;Completeproteome;Directproteinsequencing;Metal-binding;Referenceproteome;Repeat
Q71RI9;A0A0G2JGE1;Q71RI9-2	Q71RI9;A0A0G2JGE1;Q71RI9-2	Kynurenine--oxoglutarate transaminase 3	Ccbl2	NaN	NaN	NaN	NaN	NaN	NaN	NaN	NaN	NaN	NaN		-4.34294e-08	1	0	1	1	1	2.9	2.9	2.9	51.126	0	3.0807	512130000	11	2-oxoglutarate metabolic process;biosynthetic process;carboxylic acid metabolic process;cellular ketone metabolic process;cellular metabolic process;cellular process;dicarboxylic acid metabolic process;metabolic process;organic acid metabolic process;oxoacid metabolic process;small molecule metabolic process	binding;carbon-sulfur lyase activity;catalytic activity;cofactor binding;cysteine-S-conjugate beta-lyase activity;kynurenine-glyoxylate transaminase activity;kynurenine-oxoglutarate transaminase activity;lyase activity;pyridoxal phosphate binding;transaminase activity;transferase activity;transferase activity, transferring nitrogenous groups;vitamin B6 binding;vitamin binding	cell part;cytoplasmic part;intracellular membrane-bounded organelle;intracellular organelle;intracellular part;membrane-bounded organelle;mitochondrion;organelle	Selenocompound metabolism;Tryptophan metabolism	3D-structure;Acetylation;Alternativesplicing;Aminotransferase;Completeproteome;Lyase;Pyridoxalphosphate;Referenceproteome;Transferase
Q8BVI4;D3Z1A1;A0A0G2JGJ1;D3Z099;A0A0G2JGY0;D3YWR7	Q8BVI4;D3Z1A1;A0A0G2JGJ1;D3Z099;A0A0G2JGY0;D3YWR7	Dihydropteridine reductase	Qdpr	NaN	NaN	NaN	NaN	NaN	NaN	NaN	NaN	NaN	NaN		-4.34294e-08	1	0	2	2	2	7.5	7.5	7.5	25.57	0.002419	1.5792	11127000000	8	amine catabolic process;amine metabolic process;anatomical structure development;aromatic amino acid family catabolic process;aromatic amino acid family metabolic process;aromatic compound biosynthetic process;aromatic compound catabolic process;biosynthetic process;carboxylic acid catabolic process;carboxylic acid metabolic process;catabolic process;cellular amine metabolic process;cellular amin…	6,7-dihydropteridine reductase activity;binding;catalytic activity;coenzyme binding;cofactor binding;NAD binding;NADH binding;NADP binding;NADPH binding;nucleotide binding;oxidoreductase activity;oxidoreductase activity, acting on the CH-NH group of donors;oxidoreductase activity, acting on the CH-NH group of donors, NAD or NADP as acceptor	cell part;cell projection;cytoplasmic part;cytosol;intracellular membrane-bounded organelle;intracellular organelle;intracellular part;membrane-bounded organelle;mitochondrion;neuron projection;organelle	Folate biosynthesis	Completeproteome;Directproteinsequencing;NADP;Oxidoreductase;Referenceproteome;Tetrahydrobiopterinbiosynthesis
Q99PU8;A0A0G2JGL8;Q99PU8-2;Q99PU8-3	Q99PU8;A0A0G2JGL8;Q99PU8-2;Q99PU8-3	Putative ATP-dependent RNA helicase DHX30	Dhx30	NaN	NaN	NaN	NaN	NaN	NaN	NaN	NaN	NaN	NaN		-4.34294e-08	1	0	4	4	4	4	4	4	136.67	0	9.6875	387180000	5		adenyl nucleotide binding;adenyl ribonucleotide binding;ATP binding;ATPase activity;ATPase activity, coupled;ATP-dependent helicase activity;binding;catalytic activity;chromatin binding;helicase activity;hydrolase activity;hydrolase activity, acting on acid anhydrides;hydrolase activity, acting on acid anhydrides, in phosphorus-containing anhydrides;nucleic acid binding;nucleoside-triphosphatase …	cell part;cytoplasmic part;intracellular non-membrane-bounded organelle;intracellular organelle;intracellular organelle part;intracellular part;mitochondrial nucleoid;mitochondrial part;non-membrane-bounded organelle;nucleoid;organelle;organelle part		Alternativesplicing;ATP-binding;Completeproteome;Cytoplasm;Helicase;Hydrolase;Mitochondrion;Mitochondrionnucleoid;Nucleotide-binding;Phosphoprotein;Referenceproteome;RNA-binding
P08556;A0A0G2JGP4;Q9D091;A0A0G2JE25	P08556;A0A0G2JGP4;Q9D091;A0A0G2JE25	GTPase NRas	Nras	25.5422	25.0663	25.0745	25.175	NaN	24.7987	24.9738	25.1139	24.5714	NaN		0.682389	0.16372	-0.341374	6	2	1	37	11.1	4.8	21.199	0	6.6798	1082400000	26	biological regulation;cellular process;cellular response to stimulus;intracellular signal transduction;Ras protein signal transduction;regulation of biological process;regulation of cell cycle;regulation of cellular process;response to stimulus;signal transduction;small GTPase mediated signal transduction	binding;catalytic activity;GTP binding;GTPase activity;guanyl nucleotide binding;guanyl ribonucleotide binding;hydrolase activity;hydrolase activity, acting on acid anhydrides;hydrolase activity, acting on acid anhydrides, in phosphorus-containing anhydrides;nucleoside-triphosphatase activity;nucleotide binding;purine nucleotide binding;purine ribonucleoside triphosphate binding;purine ribonucleo…	cell part;cytoplasmic part;Golgi apparatus part;Golgi membrane;intracellular organelle part;intracellular part;membrane;organelle membrane;organelle part;plasma membrane	Acute myeloid leukemia;Axon guidance;B cell receptor signaling pathway;Bladder cancer;Chemokine signaling pathway;Chronic myeloid leukemia;Endometrial cancer;ErbB signaling pathway;Fc epsilon RI signaling pathway;Gap junction;Glioma;GnRH signaling pathway;Hepatitis C;Insulin signaling pathway;Long-term depression;Long-term potentiation;MAPK signaling pathway;Melanogenesis;Melanoma;Natural killer …	Acetylation;Cellmembrane;Completeproteome;Golgiapparatus;GTP-binding;Lipoprotein;Membrane;Methylation;Nucleotide-binding;Palmitate;Prenylation;Proto-oncogene;Referenceproteome
Q9JLM8;A0A0G2JGQ6;Q9JLM8-2;Q80VB6;A0A0G2JGR9;A0A0G2JGH1;Q1EDH1;H7BX36;A0A0G2JE54;Q8CCN4;A0A0G2JEN4;O88809;Q9CXL6;A8IP62;Q6PGI2	Q9JLM8;A0A0G2JGQ6;Q9JLM8-2;Q80VB6	Serine/threonine-protein kinase DCLK1	Dclk1	27.6887	27.5148	NaN	NaN	27.7066	25.6417	25.3223	25.6467	27.1994	NaN	+	2.1378	0.00506667	-2.11975	9	9	9	14.2	14.2	14.2	84.152	0	121.12	10159000000	63	anatomical structure development;anatomical structure morphogenesis;axon extension;axonogenesis;biological regulation;brain development;cell growth;cell migration;cell motility;cell part morphogenesis;cell projection morphogenesis;cell projection organization;cellular component morphogenesis;cellular component movement;cellular component organization;cellular component organization at cellular le…	adenyl nucleotide binding;adenyl ribonucleotide binding;ATP binding;binding;catalytic activity;cytoskeletal protein binding;kinase activity;microtubule binding;nucleotide binding;phosphotransferase activity, alcohol group as acceptor;protein binding;protein kinase activity;protein serine/threonine kinase activity;purine nucleotide binding;purine ribonucleoside triphosphate binding;purine ribonucl…	cell part;cell projection;cytoplasm;cytoskeletal part;intracellular;intracellular organelle part;intracellular part;macromolecular complex;microtubule;neuron projection;organelle part;protein complex		Alternativesplicing;ATP-binding;Cellprojection;Completeproteome;Cytoplasm;Developmentalprotein;Differentiation;Kinase;Microtubule;Neurogenesis;Nucleotide-binding;Phosphoprotein;Referenceproteome;Repeat;Serine/threonine-proteinkinase;Transferase
A0A0G2JGU1;Q64302	A0A0G2JGU1;Q64302	Transmembrane 4 L6 family member 1	Tm4sf1	26.5311	26.4998	27.3981	26.5453	NaN	26.9199	26.7902	27.3454	27.4835	26.8135		0.0394228	0.893663	0.0453609	1	1	1	6.6	6.6	6.6	14.782	0.00050403	1.9259	1629300000	30			cell part;integral to membrane;integral to plasma membrane;intrinsic to membrane;intrinsic to plasma membrane;membrane part;plasma membrane part		Completeproteome;Glycoprotein;Membrane;Referenceproteome;Transmembrane;Transmembranehelix
Q6PIC6;A0A0G2JGX4;Q8VCE0	Q6PIC6;A0A0G2JGX4;Q8VCE0	Sodium/potassium-transporting ATPase subunit alpha-3	Atp1a3	30.5614	30.4817	30.7315	31.455	31.3055	30.6125	30.58	30.8591	31.1527	30.9788		0.0160688	0.957031	0.00473944	30	14	14	37.9	18.3	18.3	111.69	0	323.31	41068000000	219	adult behavior;adult locomotory behavior;associative learning;ATP biosynthetic process;ATP metabolic process;behavior;biological regulation;biosynthetic process;cation transport;cell surface receptor linked signaling pathway;cellular biosynthetic process;cellular metabolic process;cellular nitrogen compound biosynthetic process;cellular nitrogen compound metabolic process;cellular process;cellula…	active transmembrane transporter activity;adenyl nucleotide binding;adenyl ribonucleotide binding;ATP binding;ATPase activity;ATPase activity, coupled;ATPase activity, coupled to movement of substances;ATPase activity, coupled to transmembrane movement of ions;ATPase activity, coupled to transmembrane movement of ions, phosphorylative mechanism;ATPase activity, coupled to transmembrane movement o…	axon;cell part;cell projection;cytoplasm;cytoplasmic part;endoplasmic reticulum;Golgi apparatus;integral to membrane;intracellular membrane-bounded organelle;intracellular organelle;intracellular part;intrinsic to membrane;macromolecular complex;membrane;membrane part;membrane-bounded organelle;myelin sheath;neuron projection;nucleus;organelle;plasma membrane;plasma membrane part;protein complex;…	Aldosterone-regulated sodium reabsorption;Bile secretion;Carbohydrate digestion and absorption;Cardiac muscle contraction;Endocrine and other factor-regulated calcium reabsorption;Gastric acid secretion;Mineral absorption;Pancreatic secretion;Protein digestion and absorption;Proximal tubule bicarbonate reclamation;Salivary secretion	ATP-binding;Cellmembrane;Completeproteome;Directproteinsequencing;Hydrolase;Iontransport;Magnesium;Membrane;Metal-binding;Nucleotide-binding;Phosphoprotein;Potassium;Potassiumtransport;Referenceproteome;Sodium;Sodium/potassiumtransport;Sodiumtransport;Transmembrane;Transmembranehelix;Transport
Q99PP7;A0A0G2JGY5;E9QME5;E9QP19;Q99PP7-2;A0A0G2JE09	Q99PP7;A0A0G2JGY5;E9QME5;E9QP19;Q99PP7-2;A0A0G2JE09	E3 ubiquitin-protein ligase TRIM33	Trim33	NaN	NaN	NaN	NaN	NaN	23.8992	24.184	NaN	NaN	NaN		0	0.970554	NaN	2	2	2	2.1	2.1	2.1	123.84	0	2.9656	320590000	6	biological regulation;biosynthetic process;cellular biosynthetic process;cellular macromolecule biosynthetic process;cellular macromolecule metabolic process;cellular metabolic process;cellular nitrogen compound metabolic process;cellular process;cellular protein metabolic process;macromolecule biosynthetic process;macromolecule metabolic process;macromolecule modification;metabolic process;negat…	binding;catalytic activity;cation binding;co-SMAD binding;DNA binding;ion binding;ligase activity;metal ion binding;nucleic acid binding;protein binding;R-SMAD binding;SMAD binding;transition metal ion binding;zinc ion binding	cell part;intracellular membrane-bounded organelle;intracellular organelle;intracellular part;membrane-bounded organelle;nucleus;organelle		Acetylation;Alternativesplicing;Bromodomain;Coiledcoil;Completeproteome;DNA-binding;Ligase;Metal-binding;Nucleus;Phosphoprotein;Referenceproteome;Repeat;Repressor;Transcription;Transcriptionregulation;Ublconjugation;Ublconjugationpathway;Zinc;Zinc-finger
P63073;A0A0G2JH04;A0A0G2JFB4;A0A0G2JGT5;A0A0G2JG98	P63073;A0A0G2JH04;A0A0G2JFB4;A0A0G2JGT5	Eukaryotic translation initiation factor 4E	Eif4e	26.3297	27.2697	26.613	27.1994	NaN	28.0199	27.3616	27.2398	26.9458	27.2051	+	0.93481	0.0528131	0.953271	4	4	4	20.3	20.3	20.3	25.053	0	39.681	7565700000	37	anatomical structure development;biological regulation;cell cycle process;cellular process;developmental process;G1/S transition of mitotic cell cycle;lung development;organ development;positive regulation of biological process;positive regulation of cell cycle;positive regulation of cellular process;positive regulation of mitotic cell cycle;posttranscriptional regulation of gene expression;regul…	binding;nucleic acid binding;RNA binding;translation factor activity, nucleic acid binding;translation initiation factor activity	cell part;chromatoid body;cytoplasmic mRNA processing body;cytoplasmic part;eukaryotic translation initiation factor 4F complex;intracellular non-membrane-bounded organelle;intracellular organelle;intracellular part;macromolecular complex;mRNA cap binding complex;non-membrane-bounded organelle;organelle;protein complex;ribonucleoprotein complex;RNA cap binding complex;RNA granule;RNAi effector co…	Insulin signaling pathway;mTOR signaling pathway;RNA transport	3D-structure;Acetylation;Completeproteome;Cytoplasm;Initiationfactor;Phosphoprotein;Proteinbiosynthesis;Referenceproteome;RNA-binding;Translationregulation
A0A0G2JH18;Q9CZG3	A0A0G2JH18;Q9CZG3	COMM domain-containing protein 8	Commd8	NaN	NaN	NaN	NaN	NaN	NaN	NaN	24.3043	NaN	NaN		-4.34294e-08	1	0	2	2	2	17.8	17.8	17.8	14.76	0	3.1145	549530000	7					Completeproteome;Referenceproteome
Q8BUV3;A0JNY3	Q8BUV3;A0JNY3	Gephyrin;Molybdopterin adenylyltransferase;Molybdopterin molybdenumtransferase	Gphn	24.9981	24.7773	NaN	25.2286	NaN	24.8692	24.9427	25.0973	24.9179	24.8439		0.0506642	0.91072	0.0182295	6	6	6	9.5	9.5	9.5	83.281	0	11.179	1242200000	13	aromatic compound biosynthetic process;biosynthetic process;cellular aromatic compound metabolic process;cellular biosynthetic process;cellular component organization;cellular component organization or biogenesis;cellular metabolic process;cellular nitrogen compound biosynthetic process;cellular nitrogen compound metabolic process;cellular process;coenzyme biosynthetic process;coenzyme metabolic …	adenyl nucleotide binding;adenyl ribonucleotide binding;ATP binding;binding;catalytic activity;cation binding;cytoskeletal protein binding;ion binding;metal ion binding;nucleotide binding;protein binding;purine nucleotide binding;purine ribonucleoside triphosphate binding;purine ribonucleotide binding;ribonucleotide binding;transferase activity	cell junction;cell part;cytoplasm;cytoskeleton;extrinsic to membrane;extrinsic to plasma membrane;intracellular;intracellular non-membrane-bounded organelle;intracellular organelle;intracellular part;membrane;membrane part;non-membrane-bounded organelle;organelle;plasma membrane part;postsynaptic membrane;synapse part;synaptic membrane		ATP-binding;Celljunction;Cellmembrane;Completeproteome;Cytoplasm;Cytoskeleton;Magnesium;Membrane;Metal-binding;Molybdenum;Molybdenumcofactorbiosynthesis;Multifunctionalenzyme;Nucleotide-binding;Phosphoprotein;Postsynapticcellmembrane;Referenceproteome;Synapse;Transferase
A1L3P4;B0QZV3	A1L3P4;B0QZV3	Sodium/hydrogen exchanger	Slc9a6	NaN	NaN	NaN	NaN	NaN	NaN	NaN	NaN	NaN	NaN		-4.34294e-08	1	0	1	1	1	1.7	1.7	1.7	77.952	0	3.2475	455490000	27	biological regulation;cation homeostasis;chemical homeostasis;homeostatic process;ion homeostasis;monovalent inorganic cation homeostasis;regulation of biological quality;regulation of pH	active transmembrane transporter activity;antiporter activity;cation transmembrane transporter activity;cation:cation antiporter activity;hydrogen ion transmembrane transporter activity;inorganic cation transmembrane transporter activity;ion transmembrane transporter activity;metal ion transmembrane transporter activity;monovalent cation:hydrogen antiporter activity;monovalent inorganic cation tr…	cell part;cytoplasmic part;early endosome membrane;endoplasmic reticulum membrane;endoplasmic reticulum part;endosomal part;endosome membrane;integral to membrane;intracellular membrane-bounded organelle;intracellular organelle;intracellular organelle part;intracellular part;intrinsic to membrane;membrane;membrane part;membrane-bounded organelle;mitochondrion;organelle;organelle membrane;organell…		Antiport;Completeproteome;Iontransport;Membrane;Referenceproteome;Sodium;Sodiumtransport;Transmembrane;Transmembranehelix;Transport
Q8VHR5;A1L3S7;Q8VHR5-2	Q8VHR5;A1L3S7;Q8VHR5-2	Transcriptional repressor p66-beta	Gatad2b	NaN	26.5132	26.1867	25.6929	25.8382	26.4629	26.7261	26.0282	25.9098	25.8142		0.439295	0.31487	0.244596	6	6	6	14.6	14.6	14.6	65.41	0	135.12	2543900000	45	biosynthetic process;cellular biosynthetic process;cellular macromolecule biosynthetic process;cellular macromolecule metabolic process;cellular metabolic process;cellular nitrogen compound metabolic process;cellular process;macromolecule biosynthetic process;macromolecule metabolic process;metabolic process;nitrogen compound metabolic process;nucleic acid metabolic process;nucleobase-containing …	binding;cation binding;DNA binding;ion binding;metal ion binding;nucleic acid binding;nucleic acid binding transcription factor activity;sequence-specific DNA binding;sequence-specific DNA binding transcription factor activity;transition metal ion binding;zinc ion binding	cell part;intracellular membrane-bounded organelle;intracellular organelle;intracellular organelle part;intracellular part;membrane-bounded organelle;nuclear body;nuclear part;nuclear speck;nucleoplasm part;nucleus;organelle;organelle part		Alternativesplicing;Coiledcoil;Completeproteome;Metal-binding;Nucleus;Phosphoprotein;Referenceproteome;Repressor;Transcription;Transcriptionregulation;Zinc;Zinc-finger
A2A432;E9PXY1;A2A432-2;J3QJX0	A2A432;E9PXY1;A2A432-2;J3QJX0	Cullin-4B	Cul4b	NaN	24.8161	NaN	NaN	NaN	25.4735	24.8461	24.9255	NaN	24.7793		0	0.970117	0.34368	10	6	6	11.9	7.3	7.3	110.7	0	27.471	1117600000	15	biological regulation;catabolic process;cell cycle;cellular catabolic process;cellular macromolecule catabolic process;cellular macromolecule metabolic process;cellular metabolic process;cellular nitrogen compound metabolic process;cellular process;cellular protein metabolic process;cellular response to stimulus;cellular response to stress;DNA metabolic process;DNA repair;macromolecule catabolic …		cell part;CUL4 RING ubiquitin ligase complex;Cul4B-RING ubiquitin ligase complex;cullin-RING ubiquitin ligase complex;intracellular membrane-bounded organelle;intracellular organelle;intracellular part;macromolecular complex;membrane;membrane-bounded organelle;nucleus;organelle;plasma membrane;protein complex;ubiquitin ligase complex	Nucleotide excision repair;Ubiquitin mediated proteolysis	Alternativesplicing;Cellcycle;Completeproteome;DNAdamage;DNArepair;Isopeptidebond;Nucleus;Phosphoprotein;Referenceproteome;Ublconjugation;Ublconjugationpathway
Q62077;A2A4A6;G3UXP4	Q62077;A2A4A6;G3UXP4	1-phosphatidylinositol 4,5-bisphosphate phosphodiesterase gamma-1;Phosphoinositide phospholipase C	Plcg1	NaN	NaN	NaN	NaN	NaN	NaN	NaN	22.4866	NaN	NaN		-4.34294e-08	1	0	2	2	2	1.4	1.4	1.4	149.67	0.0024219	1.5842	199610000	5	activation of immune response;antigen receptor-mediated signaling pathway;biological regulation;catabolic process;cell surface receptor linked signaling pathway;cellular catabolic process;cellular lipid catabolic process;cellular lipid metabolic process;cellular metabolic process;cellular process;cellular response to chemical stimulus;cellular response to endogenous stimulus;cellular response to …	binding;calcium ion binding;catalytic activity;cation binding;hydrolase activity;hydrolase activity, acting on ester bonds;ion binding;lipase activity;lipid binding;metal ion binding;molecular transducer activity;phosphatidylinositol phospholipase C activity;phospholipase activity;phospholipase C activity;phospholipid binding;phosphoric diester hydrolase activity;phosphoric ester hydrolase activi…	cell part;cell projection;cytoplasm;cytoplasmic part;cytosol;intracellular organelle part;intracellular part;lamellipodium;macromolecular complex;membrane;nuclear part;organelle part;plasma membrane;protein complex;ruffle;signalosome	Calcium signaling pathway;Epithelial cell signaling in Helicobacter pylori infection;ErbB signaling pathway;Fc epsilon RI signaling pathway;Fc gamma R-mediated phagocytosis;Glioma;Inositol phosphate metabolism;Leukocyte transendothelial migration;Natural killer cell mediated cytotoxicity;Neurotrophin signaling pathway;Non-small cell lung cancer;Pathways in cancer;Phosphatidylinositol signaling sy…	Acetylation;Calcium;Cellprojection;Completeproteome;Hydrolase;Lipiddegradation;Lipidmetabolism;Metal-binding;Phosphoprotein;Referenceproteome;Repeat;SH2domain;SH3domain;Transducer;Ublconjugation
P61290;A2A4J1;A2A4J3	P61290;A2A4J1;A2A4J3	Proteasome activator complex subunit 3	Psme3	NaN	NaN	NaN	NaN	NaN	26.2287	NaN	NaN	NaN	NaN		0	0.969681	NaN	4	4	4	19.7	19.7	19.7	29.506	0	16.288	2057600000	34	apoptosis;biological regulation;cell cycle;cell death;cellular process;death;programmed cell death;regulation of apoptosis;regulation of biological process;regulation of catabolic process;regulation of cell death;regulation of cellular catabolic process;regulation of cellular metabolic process;regulation of cellular process;regulation of cellular protein metabolic process;regulation of macromolec…	binding;endopeptidase activator activity;endopeptidase regulator activity;enzyme activator activity;enzyme regulator activity;p53 binding;peptidase activator activity;peptidase regulator activity;protein binding	cell part;cytoplasm;intracellular membrane-bounded organelle;intracellular organelle;intracellular part;macromolecular complex;membrane-bounded organelle;nucleus;organelle;proteasome activator complex;protein complex	Antigen processing and presentation;Hepatitis C;Proteasome	Acetylation;Apoptosis;Cellcycle;Completeproteome;Cytoplasm;Nucleus;Phosphoprotein;Proteasome;Referenceproteome
Q9CQ80;A8XY17;A2A4J8;A2A4K0;Q9CQ80-2	Q9CQ80;A8XY17;A2A4J8	Vacuolar protein-sorting-associated protein 25	Vps25	25.704	25.5935	NaN	NaN	25.4424	25.6658	NaN	NaN	25.6987	25.7772		0	0.969245	0.0170908	3	3	3	15.9	15.9	15.9	20.747	0.00052029	2.1709	1086300000	14	biological regulation;biosynthetic process;cellular biosynthetic process;cellular macromolecule biosynthetic process;cellular macromolecule metabolic process;cellular metabolic process;cellular nitrogen compound metabolic process;cellular process;establishment of localization;establishment of protein localization;macromolecule biosynthetic process;macromolecule metabolic process;metabolic process…		cell part;cytoplasmic part;endosomal part;endosome membrane;intracellular membrane-bounded organelle;intracellular organelle;intracellular organelle part;intracellular part;membrane;membrane-bounded organelle;mitochondrion;nucleus;organelle;organelle membrane;organelle part	Endocytosis	Alternativesplicing;Completeproteome;Cytoplasm;Endosome;Membrane;Nucleus;Proteintransport;Referenceproteome;Transcription;Transcriptionregulation;Transport
Q3THG9;A2A4P3;A2A4P4	Q3THG9;A2A4P3;A2A4P4	Alanyl-tRNA editing protein Aarsd1	Aarsd1;Gm27029	NaN	NaN	NaN	NaN	NaN	24.5148	NaN	NaN	NaN	NaN		0	0.968809	NaN	2	2	2	8.3	8.3	8.3	44.97	0	2.7524	297630000	2	alanyl-tRNA aminoacylation;amine metabolic process;amino acid activation;carboxylic acid metabolic process;cellular amine metabolic process;cellular amino acid metabolic process;cellular ketone metabolic process;cellular macromolecule metabolic process;cellular metabolic process;cellular nitrogen compound metabolic process;cellular process;macromolecule metabolic process;metabolic process;ncRNA m…	adenyl nucleotide binding;adenyl ribonucleotide binding;alanine-tRNA ligase activity;aminoacyl-tRNA ligase activity;ATP binding;binding;catalytic activity;cation binding;ion binding;ligase activity;ligase activity, forming aminoacyl-tRNA and related compounds;ligase activity, forming carbon-oxygen bonds;metal ion binding;nucleic acid binding;nucleotide binding;purine nucleotide binding;purine rib…	cell part;cytoplasm;intracellular part		Completeproteome;Cytoplasm;Metal-binding;Phosphoprotein;Proteinbiosynthesis;Referenceproteome;Zinc
Q9QX11;Q3TZ02;A2A517;Q9QX11-2;P63034;D3YU96;Q99KH2;D3YU95;P63034-3;P63034-2;B1AQE4;D6RCZ5	Q9QX11;Q3TZ02;A2A517;Q9QX11-2;P63034;D3YU96;Q99KH2;D3YU95;P63034-3;P63034-2	Cytohesin-1;Cytohesin-2	Cyth1;Cyth2	NaN	NaN	NaN	NaN	NaN	NaN	NaN	NaN	NaN	NaN		-4.34294e-08	1	0	3	1	1	12.3	5	5	46.273	0.004297	1.4505	618570000	6	biological regulation;cellular process;establishment of cell polarity;establishment of epithelial cell polarity;establishment or maintenance of cell polarity;regulation of ARF protein signal transduction;regulation of biological process;regulation of cell adhesion;regulation of cellular process;regulation of Ras protein signal transduction;regulation of response to stimulus;regulation of signal t…	ARF guanyl-nucleotide exchange factor activity;binding;enzyme regulator activity;GTPase regulator activity;guanyl-nucleotide exchange factor activity;lipid binding;nucleoside-triphosphatase regulator activity;phospholipid binding;small GTPase regulator activity	cell junction;cell part;cell-cell junction;cytoplasm;intracellular part;membrane;occluding junction;plasma membrane;tight junction		3D-structure;Alternativesplicing;Cellmembrane;Coiledcoil;Completeproteome;Cytoplasm;Guanine-nucleotidereleasingfactor;Membrane;Referenceproteome
P84099;A2A547	P84099;A2A547	60S ribosomal protein L19;Ribosomal protein L19	Rpl19	28.8364	28.7894	28.2105	28.7304	NaN	29.4161	29.5995	28.8975	29.3825	28.7414	+	1.35083	0.02251	0.89571	4	4	4	20.9	20.9	20.9	23.466	0	88.457	28561000000	44	biosynthetic process;cellular biosynthetic process;cellular macromolecule biosynthetic process;cellular macromolecule metabolic process;cellular metabolic process;cellular process;cellular protein metabolic process;macromolecule biosynthetic process;macromolecule metabolic process;metabolic process;primary metabolic process;protein metabolic process;translation	structural constituent of ribosome;structural molecule activity	cell part;cytosolic large ribosomal subunit;intracellular organelle part;intracellular part;large ribosomal subunit;macromolecular complex;organelle part;ribonucleoprotein complex	Ribosome	3D-structure;Completeproteome;Directproteinsequencing;Phosphoprotein;Referenceproteome;Ribonucleoprotein;Ribosomalprotein
A2A5R2	A2A5R2	Brefeldin A-inhibited guanine nucleotide-exchange protein 2	Arfgef2	NaN	NaN	NaN	NaN	NaN	NaN	NaN	NaN	NaN	NaN		-4.34294e-08	1	0	3	1	1	2.3	0.7	0.7	202.24	0	4.5368	128180000	2	biological regulation;cellular component organization;cellular component organization at cellular level;cellular component organization or biogenesis;cellular component organization or biogenesis at cellular level;cellular macromolecule metabolic process;cellular membrane organization;cellular metabolic process;cellular process;cellular response to stimulus;endomembrane system organization;endoso…	ARF guanyl-nucleotide exchange factor activity;binding;enzyme regulator activity;GABA receptor binding;GTPase regulator activity;guanyl-nucleotide exchange factor activity;nucleoside-triphosphatase regulator activity;protein binding;protein kinase A binding;protein kinase A regulatory subunit binding;receptor binding;small GTPase regulator activity	asymmetric synapse;axonemal microtubule;axoneme part;cell junction;cell part;cell projection;cell projection part;cytoplasmic membrane-bounded vesicle;cytoplasmic part;cytoplasmic vesicle;cytoskeletal part;cytosol;dendritic spine;endosome;Golgi apparatus part;Golgi membrane;intracellular membrane-bounded organelle;intracellular organelle;intracellular organelle part;intracellular part;macromolecu…		Celljunction;Cellprojection;Completeproteome;Cytoplasm;Cytoplasmicvesicle;Cytoskeleton;Endosome;Golgiapparatus;Guanine-nucleotidereleasingfactor;Membrane;Phosphoprotein;Proteintransport;Referenceproteome;Synapse;Transport
Q9Z108;A2A5R8;Q9DBE7;A2A5S3;V9GX87	Q9Z108;A2A5R8;Q9DBE7;A2A5S3;V9GX87	Double-stranded RNA-binding protein Staufen homolog 1	Stau1	NaN	NaN	NaN	25.1075	NaN	NaN	25.2084	25.012	25.0541	25.0927		0	0.968374	NaN	3	3	3	7	7	7	53.924	0	3.3512	861010000	7	cellular localization;cellular macromolecule localization;cellular process;intracellular mRNA localization;localization;macromolecule localization;RNA localization	binding;double-stranded RNA binding;nucleic acid binding;RNA binding	cell part;cytoplasm;cytoplasmic part;endoplasmic reticulum;intracellular membrane-bounded organelle;intracellular non-membrane-bounded organelle;intracellular organelle;intracellular part;macromolecular complex;membrane-bounded organelle;non-membrane-bounded organelle;organelle;ribonucleoprotein complex;RNA granule;rough endoplasmic reticulum;stress granule		Completeproteome;Cytoplasm;Endoplasmicreticulum;Referenceproteome;Repeat;RNA-binding
P55194;A2A5V3;A2A5V2;S4R2D3;A2A5V4	P55194;A2A5V3;A2A5V2;S4R2D3;A2A5V4	SH3 domain-binding protein 1	Sh3bp1	NaN	NaN	NaN	NaN	NaN	NaN	NaN	NaN	NaN	NaN		-4.34294e-08	1	0	1	1	1	1.8	1.8	1.8	65.284	0.00050569	1.9537	41083000	1	biological regulation;cellular process;cellular response to stimulus;positive regulation of catalytic activity;positive regulation of GTPase activity;positive regulation of hydrolase activity;positive regulation of molecular function;regulation of biological process;regulation of catabolic process;regulation of catalytic activity;regulation of cellular catabolic process;regulation of cellular met…	enzyme activator activity;enzyme regulator activity;GTPase activator activity;GTPase regulator activity;nucleoside-triphosphatase regulator activity	cell part;cytoplasm;intracellular part		3D-structure;Completeproteome;GTPaseactivation;Phosphoprotein;Referenceproteome;SH3-binding
A2A6H1	A2A6H1		Lasp1	NaN	NaN	NaN	NaN	NaN	NaN	NaN	NaN	NaN	NaN		-4.34294e-08	1	0	4	1	1	69.6	16.1	16.1	6.5092	0.00026455	2.3127	1088500000	19		actin binding;actin filament binding;binding;cytoskeletal protein binding;ion transmembrane transporter activity;protein binding;substrate-specific transmembrane transporter activity;substrate-specific transporter activity;transmembrane transporter activity;transporter activity	adherens junction;anchoring junction;cell cortex part;cell junction;cell part;cell-substrate adherens junction;cell-substrate junction;cortical actin cytoskeleton;cortical cytoskeleton;cytoplasm;cytoplasmic part;cytoskeletal part;cytoskeleton;focal adhesion;intracellular non-membrane-bounded organelle;intracellular organelle;intracellular organelle part;intracellular part;non-membrane-bounded org…		Completeproteome;Referenceproteome
P19973;A2A6J4;A2A6J7;P19973-2	P19973;A2A6J4;A2A6J7;P19973-2	Lymphocyte-specific protein 1	Lsp1	NaN	NaN	NaN	NaN	NaN	NaN	NaN	NaN	NaN	NaN		-4.34294e-08	1	0	5	5	5	21.2	21.2	21.2	36.713	0	31.681	529360000	4	apoptosis;cell death;cellular component organization;cellular component organization at cellular level;cellular component organization or biogenesis;cellular component organization or biogenesis at cellular level;cellular process;chemotaxis;cytoskeleton organization;death;defense response;locomotion;organelle organization;programmed cell death;response to chemical stimulus;response to external st…	actin binding;binding;cytoskeletal protein binding;molecular transducer activity;protein binding;signal transducer activity	cell part;membrane;plasma membrane		Acetylation;Alternativesplicing;Cellmembrane;Completeproteome;Directproteinsequencing;Membrane;Phosphoprotein;Referenceproteome
Q9CZ28;A2A6M1	Q9CZ28;A2A6M1	Vacuolar-sorting protein SNF8	Snf8	NaN	NaN	NaN	NaN	NaN	NaN	NaN	NaN	NaN	NaN		-4.34294e-08	1	0	1	1	1	4.7	4.7	4.7	28.886	0	3.6731	77311000	4	biological regulation;biosynthetic process;cellular biosynthetic process;cellular macromolecule biosynthetic process;cellular macromolecule metabolic process;cellular metabolic process;cellular nitrogen compound metabolic process;cellular process;establishment of localization;establishment of protein localization;macromolecule biosynthetic process;macromolecule metabolic process;metabolic process…		cell part;cytoplasmic part;endosomal part;endosome membrane;intracellular organelle part;intracellular part;late endosome membrane;macromolecular complex;membrane;nuclear part;nucleoplasm part;organelle membrane;organelle part;protein complex;transcription factor complex	Endocytosis	Coiledcoil;Completeproteome;Cytoplasm;Endosome;Membrane;Nucleus;Proteintransport;Referenceproteome;Transcription;Transcriptionregulation;Transport
A2A6Q5;A2A6Q5-2;A2A6Q5-3	A2A6Q5;A2A6Q5-2;A2A6Q5-3	Cell division cycle protein 27 homolog	Cdc27	NaN	NaN	NaN	NaN	NaN	NaN	NaN	NaN	NaN	NaN		-4.34294e-08	1	0	1	1	1	1.2	1.2	1.2	91.841	0.0061205	1.3234	240950000	2	anaphase-promoting complex-dependent proteasomal ubiquitin-dependent protein catabolic process;catabolic process;cellular catabolic process;cellular macromolecule catabolic process;cellular macromolecule metabolic process;cellular metabolic process;cellular process;cellular protein metabolic process;macromolecule catabolic process;macromolecule metabolic process;macromolecule modification;metabol…		anaphase-promoting complex;cell part;cullin-RING ubiquitin ligase complex;intracellular organelle part;intracellular part;macromolecular complex;nuclear part;nuclear ubiquitin ligase complex;organelle part;protein complex;ubiquitin ligase complex	Cell cycle;Cell cycle - yeast;Meiosis - yeast;Oocyte meiosis;Progesterone-mediated oocyte maturation;Ubiquitin mediated proteolysis	Alternativesplicing;Completeproteome;Nucleus;Phosphoprotein;Referenceproteome;Repeat;TPRrepeat;Ublconjugationpathway
A2A6T1	A2A6T1	Cerebellar degeneration-related protein 2-like	Cdr2l	NaN	NaN	NaN	NaN	NaN	NaN	NaN	NaN	NaN	NaN		-4.34294e-08	1	0	3	3	3	7.1	7.1	7.1	53.212	0.00051335	2.061	142720000	2					Coiledcoil;Completeproteome;Referenceproteome
Q80UG5;Q80UG5-3;A2A6U3;Q80UG5-2;A2A6U5;A8Y5D3;REV__Q6NSQ7	Q80UG5;Q80UG5-3;A2A6U3	Septin-9	2009-09-01	30.5354	30.4765	30.6251	30.6195	30.6666	30.7994	30.8399	30.6858	30.6823	30.6112	+	1.74962	0.055686	0.273957	19	19	19	33.1	33.1	33.1	65.574	0	176.94	33991000000	239	cell cycle;cell division;cellular component assembly;cellular component organization;cellular component organization or biogenesis;cellular process;macromolecular complex assembly;macromolecular complex subunit organization;protein complex assembly;protein complex subunit organization;protein heterooligomerization;protein oligomerization	binding;GTP binding;guanyl nucleotide binding;guanyl ribonucleotide binding;nucleotide binding;purine nucleotide binding;purine ribonucleoside triphosphate binding;purine ribonucleotide binding;ribonucleotide binding	actin filament bundle;actomyosin;cell cortex part;cell part;cytoplasmic part;cytoskeletal part;intracellular organelle part;intracellular part;macromolecular complex;microtubule;organelle part;perinuclear region of cytoplasm;protein complex;septin complex;stress fiber		Alternativesplicing;Cellcycle;Celldivision;Completeproteome;Cytoplasm;Cytoskeleton;Directproteinsequencing;GTP-binding;Nucleotide-binding;Phosphoprotein;Referenceproteome
Q8CFX1;A2A7A7;A2A7A8	Q8CFX1;A2A7A7	GDH/6PGL endoplasmic bifunctional protein;Glucose 1-dehydrogenase;6-phosphogluconolactonase	H6pd	27.6267	27.8654	27.4469	28.132	27.8105	27.9217	27.9726	27.4928	27.6253	27.8234		0.816997	0.141475	0.300827	16	16	16	25.9	25.9	25.9	88.927	0	323.31	14169000000	134	alcohol catabolic process;alcohol metabolic process;carbohydrate catabolic process;carbohydrate metabolic process;catabolic process;cellular carbohydrate catabolic process;cellular carbohydrate metabolic process;cellular metabolic process;cellular nitrogen compound metabolic process;cellular process;coenzyme metabolic process;cofactor metabolic process;glucose catabolic process;glucose metabolic …	6-phosphogluconolactonase activity;binding;carbohydrate binding;carboxylic ester hydrolase activity;catalytic activity;coenzyme binding;cofactor binding;glucose 1-dehydrogenase [NAD(P)] activity;glucose-6-phosphate dehydrogenase activity;hydrolase activity;hydrolase activity, acting on ester bonds;NADP binding;nucleotide binding;oxidoreductase activity;oxidoreductase activity, acting on CH-OH gro…	cell part;cytoplasmic part;endoplasmic reticulum lumen;endoplasmic reticulum part;intracellular membrane-bounded organelle;intracellular organelle;intracellular organelle lumen;intracellular organelle part;intracellular part;membrane-bounded organelle;membrane-enclosed lumen;mitochondrion;organelle;organelle lumen;organelle part	Pentose phosphate pathway	Carbohydratemetabolism;Completeproteome;Endoplasmicreticulum;Glucosemetabolism;Glycoprotein;Hydrolase;Multifunctionalenzyme;NAD;NADP;Oxidoreductase;Pyrrolidonecarboxylicacid;Referenceproteome;Signal
Q3V1T4;A6PW84;A2A7Q5;Q3V1T4-3;Q3V1T4-2;F2Z499	Q3V1T4;A6PW84;A2A7Q5;Q3V1T4-3;Q3V1T4-2	Prolyl 3-hydroxylase 1	Lepre1;P3h1	26.7115	NaN	27.7719	27.5404	NaN	27.3456	27.3542	27.9703	26.7225	27.577		0.0669413	0.819745	0.108225	14	14	14	19.2	19.2	19.2	83.65	0	285.5	15308000000	83	biological regulation;cell growth;cellular component organization;cellular component organization at cellular level;cellular component organization or biogenesis;cellular component organization or biogenesis at cellular level;cellular process;collagen fibril organization;collagen metabolic process;extracellular matrix organization;extracellular structure organization;growth;macromolecule metaboli…	binding;carboxylic acid binding;catalytic activity;cation binding;dioxygenase activity;ion binding;iron ion binding;L-ascorbic acid binding;metal ion binding;oxidoreductase activity;oxidoreductase activity, acting on paired donors, with incorporation or reduction of molecular oxygen;oxidoreductase activity, acting on paired donors, with incorporation or reduction of molecular oxygen, 2-oxoglutara…	cell part;cytoplasmic part;endoplasmic reticulum;extracellular matrix;extracellular region part;intracellular membrane-bounded organelle;intracellular organelle;intracellular part;membrane;membrane-bounded organelle;nucleus;organelle;plasma membrane;proteinaceous extracellular matrix		Alternativesplicing;Coiledcoil;Completeproteome;Dioxygenase;Endoplasmicreticulum;Extracellularmatrix;Glycoprotein;Iron;Metal-binding;Oxidoreductase;Referenceproteome;Repeat;Secreted;Signal;TPRrepeat;VitaminC
Q91WQ3;A2A7S7;F6VXZ2	Q91WQ3;A2A7S7	Tyrosine--tRNA ligase, cytoplasmic;Tyrosine--tRNA ligase, cytoplasmic, N-terminally processed;Tyrosine--tRNA ligase	Yars	28.2614	28.6345	28.6322	28.1091	28.5244	28.5143	28.5177	28.6275	28.3386	28.2292		0.01343	0.955862	0.00663249	21	21	21	43.4	43.4	43.4	59.105	0	76.781	16025000000	156	amine metabolic process;amino acid activation;carboxylic acid metabolic process;cellular amine metabolic process;cellular amino acid metabolic process;cellular ketone metabolic process;cellular macromolecule metabolic process;cellular metabolic process;cellular nitrogen compound metabolic process;cellular process;macromolecule metabolic process;metabolic process;ncRNA metabolic process;nitrogen c…	adenyl nucleotide binding;adenyl ribonucleotide binding;aminoacyl-tRNA ligase activity;ATP binding;binding;catalytic activity;ligase activity;ligase activity, forming aminoacyl-tRNA and related compounds;ligase activity, forming carbon-oxygen bonds;nucleic acid binding;nucleotide binding;purine nucleotide binding;purine ribonucleoside triphosphate binding;purine ribonucleotide binding;ribonucleot…	cell part;cytoplasm;intracellular membrane-bounded organelle;intracellular organelle;intracellular part;membrane-bounded organelle;nucleus;organelle	Aminoacyl-tRNA biosynthesis	Acetylation;Aminoacyl-tRNAsynthetase;ATP-binding;Completeproteome;Cytoplasm;Ligase;Nucleotide-binding;Proteinbiosynthesis;Referenceproteome;RNA-binding;tRNA-binding
A2A863-2;A2A863;A2A863-3;A2A864	A2A863-2;A2A863;A2A863-3;A2A864	Integrin beta-4;Integrin beta	Itgb4	31.7421	31.5252	31.7282	31.78	31.8173	31.1607	31.3067	31.0958	31.3425	31.2799	+	1.57679	0.0297778	-0.431495	41	41	41	29.7	29.7	29.7	194.75	0	323.31	45749000000	494	biological adhesion;biological regulation;cell adhesion;cell junction assembly;cell junction organization;cell motility;cell projection assembly;cell projection organization;cell surface receptor linked signaling pathway;cell-matrix adhesion;cell-substrate adhesion;cell-substrate junction assembly;cellular component assembly;cellular component assembly at cellular level;cellular component movemen…	receptor activity	basal plasma membrane;basement membrane;cell junction;cell leading edge;cell part;cell surface;cell-substrate junction;extracellular matrix part;extracellular region part;hemidesmosome;integrin complex;macromolecular complex;membrane part;plasma membrane part;protein complex;receptor complex	Arrhythmogenic right ventricular cardiomyopathy (ARVC);Dilated cardiomyopathy;ECM-receptor interaction;Focal adhesion;Hypertrophic cardiomyopathy (HCM);Regulation of actin cytoskeleton	Alternativesplicing;Celladhesion;Celljunction;Completeproteome;Disulfidebond;Glycoprotein;Integrin;Membrane;Phosphoprotein;Receptor;Referenceproteome;Repeat;Signal;Transmembrane;Transmembranehelix
Q8BHG2;A2A8E2;Q8BHG2-3;B7ZC72;B7ZC71;Q8BHG2-2;A2A8E4;D6REH4	Q8BHG2;A2A8E2;Q8BHG2-3;B7ZC72;B7ZC71;Q8BHG2-2	UPF0587 protein C1orf123 homolog	0610037L13Rik	25.8125	26.1845	26.0764	25.8083	NaN	25.7611	NaN	NaN	26.2371	NaN		0	0.967939	-0.263336	4	4	4	33.8	33.8	33.8	18.02	0	11.605	3179900000	30					Alternativesplicing;Completeproteome;Referenceproteome
A2A8U2;A2A8U2-2;A2A8U2-3	A2A8U2;A2A8U2-2;A2A8U2-3	Transmembrane protein 201	Tmem201	26.4358	26.6475	26.4899	27.4602	27.013	26.2453	26.7792	26.2614	26.622	26.687		0.0183806	0.94452	-0.012139	6	6	6	8.3	8.3	8.3	72.499	0	8.908	2251200000	36			cell part;integral to membrane;intracellular organelle part;intracellular part;intrinsic to membrane;membrane;membrane part;nuclear inner membrane;nuclear membrane;nuclear part;organelle inner membrane;organelle membrane;organelle part		Alternativesplicing;Completeproteome;Membrane;Nucleus;Phosphoprotein;Referenceproteome;Transmembrane;Transmembranehelix
Q52KI8;A2A8V9;E9QKA4;A2A8V8;E9PUK6;Q52KI8-2;F6T4M4;A2A983;F7BWM1;F6UK16	Q52KI8;A2A8V9;E9QKA4;A2A8V8;E9PUK6;Q52KI8-2	Serine/arginine repetitive matrix protein 1	Srrm1	25.8097	NaN	NaN	25.7414	25.6742	24.4598	24.2603	NaN	NaN	NaN		0	0.967504	-1.44963	5	5	5	8	8	8	106.86	0	80.18	1473300000	22	cellular macromolecule metabolic process;cellular metabolic process;cellular nitrogen compound metabolic process;cellular process;macromolecule metabolic process;metabolic process;mRNA metabolic process;mRNA processing;nitrogen compound metabolic process;nuclear mRNA splicing, via spliceosome;nucleic acid metabolic process;nucleobase-containing compound metabolic process;primary metabolic process…	binding;DNA binding;nucleic acid binding	catalytic step 2 spliceosome;cell part;intracellular organelle part;intracellular part;macromolecular complex;nuclear body;nuclear matrix;nuclear part;nuclear speck;nucleoplasm part;organelle part;ribonucleoprotein complex;spliceosomal complex	mRNA surveillance pathway;RNA transport	Acetylation;Alternativesplicing;Completeproteome;DNA-binding;mRNAprocessing;mRNAsplicing;Nucleus;Phosphoprotein;Referenceproteome;RNA-binding;Spliceosome
Q8R1A4;E9PX48;A2A9M5;Q8R1A4-2;A2A9M4;A2AW79;F6ZJ55	Q8R1A4;E9PX48;A2A9M5;Q8R1A4-2	Dedicator of cytokinesis protein 7	Dock7	27.3359	27.7048	27.0969	27.5845	27.0549	27.3304	27.4367	27.4426	27.3789	27.4064		0.00602068	0.966186	0.00433922	25	25	24	13	13	12.4	241.44	0	41.379	6214100000	94	activation of Rac GTPase activity;activation of Ras GTPase activity;activation of Rho GTPase activity;anatomical structure development;anatomical structure morphogenesis;axonogenesis;biological regulation;cell differentiation;cell part morphogenesis;cell projection morphogenesis;cell projection organization;cellular component morphogenesis;cellular component organization;cellular component organi…	binding;enzyme binding;enzyme regulator activity;GTPase binding;GTPase regulator activity;guanyl-nucleotide exchange factor activity;nucleoside-triphosphatase regulator activity;protein binding;Rac GTPase binding;Ras GTPase binding;Rho GTPase binding;small GTPase binding	axon;cell part;cell projection;intracellular organelle part;intracellular part;macromolecular complex;neuron projection;nuclear part;organelle part;protein complex;signalosome		Acetylation;Alternativesplicing;Cellprojection;Coiledcoil;Completeproteome;Developmentalprotein;Differentiation;Guanine-nucleotidereleasingfactor;Neurogenesis;Phosphoprotein;Referenceproteome
P24788;A2A9P6;P24788-2;Q64434	P24788;A2A9P6;P24788-2	Cyclin-dependent kinase 11B	Cdk11b	NaN	NaN	NaN	NaN	NaN	NaN	NaN	NaN	NaN	NaN		-4.34294e-08	1	0	4	4	4	5.1	5.1	5.1	91.512	0.00050723	1.9882	662710000	7	anatomical structure development;apoptosis;biological regulation;blastocyst development;cell communication;cell death;cell differentiation;cell migration;cell motility;cellular component movement;cellular developmental process;cellular macromolecule metabolic process;cellular metabolic process;cellular process;cellular protein metabolic process;cellular response to chemical stimulus;cellular resp…	adenyl nucleotide binding;adenyl ribonucleotide binding;ATP binding;binding;catalytic activity;cyclin-dependent protein kinase activity;kinase activity;non-membrane spanning protein tyrosine kinase activity;nucleotide binding;phosphotransferase activity, alcohol group as acceptor;protein kinase activity;protein serine/threonine kinase activity;protein tyrosine kinase activity;purine nucleotide bi…	cell part;cell projection;cytoplasm;intracellular membrane-bounded organelle;intracellular organelle;intracellular organelle part;intracellular part;membrane;membrane-bounded organelle;nuclear part;nucleoplasm;nucleus;organelle;organelle part;plasma membrane;ruffle		Alternativeinitiation;ATP-binding;Cellcycle;Cellprojection;Completeproteome;Cytoplasm;Kinase;Membrane;Nucleotide-binding;Nucleus;Phosphoprotein;Referenceproteome;Serine/threonine-proteinkinase;SH2domain;SH3domain;Transferase;Tyrosine-proteinkinase
Q8BHG1;A6PWC3;A2A9Q2;Q3V3G9	Q8BHG1;A6PWC3;A2A9Q2	Nardilysin	Nrd1	25.2417	24.9907	25.703	25.6815	25.3457	26.1628	26.1655	26.3668	25.7741	26.0365	+	1.29539	0.0245222	0.85237	13	13	13	12	12	12	132.89	0	34.142	3269200000	60	macromolecule metabolic process;metabolic process;primary metabolic process;protein metabolic process;proteolysis	binding;catalytic activity;cation binding;endopeptidase activity;hydrolase activity;ion binding;metal ion binding;metalloendopeptidase activity;metallopeptidase activity;peptidase activity;peptidase activity, acting on L-amino acid peptides	cell part;cytoplasmic part;intracellular membrane-bounded organelle;intracellular organelle;intracellular part;membrane-bounded organelle;mitochondrion;organelle		Completeproteome;Hydrolase;Metal-binding;Metalloprotease;Phosphoprotein;Protease;Referenceproteome;Signal;Zinc
Q3U2P1;A2AA71;A2AA72;Q3U2P1-2	Q3U2P1;A2AA71	Protein transport protein Sec24A	Sec24a	NaN	NaN	NaN	NaN	NaN	NaN	24.1777	NaN	NaN	NaN		0	0.96707	NaN	5	5	5	4.6	4.6	4.6	118.78	0	5.3099	609840000	11	cellular process;ER to Golgi vesicle-mediated transport;establishment of localization;establishment of localization in cell;establishment of protein localization;Golgi vesicle transport;intracellular protein transport;intracellular transport;protein transport;transport;vesicle-mediated transport	binding;cation binding;ion binding;metal ion binding;transition metal ion binding;zinc ion binding	cell part;COPII vesicle coat;cytoplasmic part;cytoplasmic vesicle part;endoplasmic reticulum membrane;endoplasmic reticulum part;Golgi apparatus part;Golgi membrane;intracellular organelle part;intracellular part;macromolecular complex;membrane;membrane coat;membrane part;organelle membrane;organelle part;perinuclear region of cytoplasm;protein complex;vesicle coat	Protein processing in endoplasmic reticulum	Alternativesplicing;Completeproteome;Cytoplasm;Endoplasmicreticulum;ER-Golgitransport;Golgiapparatus;Membrane;Phosphoprotein;Proteintransport;Referenceproteome;Transport
Q6NXN1;A2AA85;Q6NXN1-2	Q6NXN1;A2AA85;Q6NXN1-2	SUZ domain-containing protein 1	Szrd1	NaN	NaN	NaN	NaN	NaN	NaN	NaN	NaN	NaN	NaN		-4.34294e-08	1	0	2	2	2	20.4	20.4	20.4	16.998	0	22.566	343050000	12					Acetylation;Alternativesplicing;Completeproteome;Phosphoprotein;Referenceproteome
A2AAJ9;H7BX05;E9QQ96;Z4YJE4;A2AAJ9-2;F6TJX7;A2AAJ9-3	A2AAJ9;H7BX05;E9QQ96;Z4YJE4;A2AAJ9-2	Obscurin	Obscn	26.8425	26.8072	NaN	26.9044	26.8087	26.3156	NaN	26.6403	NaN	26.4832		0	0.966637	-0.509305	6	6	6	1.7	1.7	1.7	966.36	0	3.803	4198200000	31	biological regulation;cell differentiation;cellular developmental process;cellular process;developmental process;multicellular organismal development;multicellular organismal process;regulation of biological process;regulation of cellular process;regulation of Ras protein signal transduction;regulation of response to stimulus;regulation of Rho protein signal transduction;regulation of signal tran…	adenyl nucleotide binding;adenyl ribonucleotide binding;ATP binding;binding;catalytic activity;enzyme regulator activity;GTPase regulator activity;guanyl-nucleotide exchange factor activity;kinase activity;lipid binding;nucleoside-triphosphatase regulator activity;nucleotide binding;phospholipid binding;phosphotransferase activity, alcohol group as acceptor;protein kinase activity;protein serine/…	cell part;contractile fiber part;cytoplasmic part;intracellular;intracellular part;M band;organelle part		Alternativesplicing;ATP-binding;Calmodulin-binding;Completeproteome;Developmentalprotein;Differentiation;Disulfidebond;Immunoglobulindomain;Kinase;Muscleprotein;Nucleotide-binding;Referenceproteome;Repeat;Serine/threonine-proteinkinase;SH3domain;Transferase
O35250;A2AAN0;O35250-2;A2AAN4;A2AAN3	O35250;A2AAN0;O35250-2	Exocyst complex component 7	Exoc7	NaN	NaN	NaN	NaN	NaN	24.0029	24.432	24.2056	NaN	NaN		0	0.966203	NaN	3	3	3	4.9	4.9	4.9	79.959	0	4.4724	556960000	10	cellular process;establishment of localization;establishment of localization in cell;establishment of protein localization;exocytosis;protein transport;secretion;secretion by cell;transport;vesicle-mediated transport		cell cortex part;cell part;cell projection part;centriolar satellite;cytoplasmic part;cytoskeletal part;cytosol;exocyst;growth cone membrane;intracellular organelle part;intracellular part;macromolecular complex;membrane part;microtubule organizing center part;organelle part;plasma membrane part;protein complex	Insulin signaling pathway	3D-structure;Alternativesplicing;Cellmembrane;Coiledcoil;Completeproteome;Cytoplasm;Exocytosis;Membrane;Proteintransport;Referenceproteome;Transport
A2AAY5	A2AAY5	SH3 and PX domain-containing protein 2B	Sh3pxd2b	NaN	NaN	NaN	NaN	NaN	25.7043	26.1311	26.0782	25.4131	25.9488		0	0.965771	NaN	8	8	8	11.3	11.3	11.3	101.52	0	20.391	3842700000	30	adipose tissue development;anatomical structure development;biological regulation;bone development;cell communication;cell differentiation;cellular component assembly;cellular component disassembly;cellular component disassembly at cellular level;cellular component organization;cellular component organization at cellular level;cellular component organization or biogenesis;cellular component organ…	binding;lipid binding;phosphatidylinositol binding;phosphatidylinositol-3,5-bisphosphate binding;phosphatidylinositol-3-phosphate binding;phosphatidylinositol-4-phosphate binding;phosphatidylinositol-5-phosphate binding;phospholipid binding;protein binding;protein domain specific binding;SH2 domain binding	cell junction;cell part;cell projection;cytoplasm;cytoskeletal part;intracellular non-membrane-bounded organelle;intracellular organelle;intracellular organelle part;intracellular part;macromolecular complex;non-membrane-bounded organelle;organelle;organelle part;podosome;protein complex		Celljunction;Cellprojection;Completeproteome;Cytoplasm;Differentiation;Phosphoprotein;Referenceproteome;Repeat;SH3domain
A2ABU4	A2ABU4	Myomesin-3	Myom3	NaN	NaN	NaN	NaN	NaN	NaN	NaN	NaN	NaN	NaN		-4.34294e-08	1	0	1	1	1	0.8	0.8	0.8	161.78	0	2.8941	569690000	10		binding;identical protein binding;protein binding;protein dimerization activity;protein homodimerization activity	cell part;contractile fiber part;cytoplasmic part;intracellular part;M band;organelle part		Coiledcoil;Completeproteome;Cytoplasm;Immunoglobulindomain;Referenceproteome;Repeat
A2ABV5;A2BDP0	A2ABV5;A2BDP0	Mediator of RNA polymerase II transcription subunit 14	Med14	NaN	NaN	NaN	NaN	NaN	NaN	NaN	NaN	NaN	NaN		-4.34294e-08	1	0	1	1	1	1.6	1.6	1.6	160.96	0	4.5623	60973000	3	androgen receptor signaling pathway;biological regulation;biosynthetic process;cellular biosynthetic process;cellular macromolecule metabolic process;cellular metabolic process;cellular nitrogen compound metabolic process;cellular process;cellular response to stimulus;developmental process;intracellular receptor mediated signaling pathway;macromolecule metabolic process;metabolic process;negative…	protein binding transcription factor activity;receptor activity;RNA polymerase II transcription cofactor activity;RNA polymerase II transcription factor binding transcription factor activity;transcription coactivator activity;transcription cofactor activity;transcription factor binding transcription factor activity	cell part;intracellular organelle part;intracellular part;macromolecular complex;mediator complex;nuclear part;nucleoplasm part;organelle part;protein complex		Activator;Alternativesplicing;Completeproteome;Nucleus;Phosphoprotein;Referenceproteome;Repeat;Transcription;Transcriptionregulation
A2AC07;Q8C4X1;Q8C4X1-4;Q8C4X1-3;Q8C4X1-2	A2AC07;Q8C4X1;Q8C4X1-4;Q8C4X1-3;Q8C4X1-2	Centromere protein X	Stra13	NaN	NaN	NaN	NaN	NaN	NaN	NaN	NaN	NaN	NaN		-4.34294e-08	1	0	1	1	1	7.9	7.9	7.9	13.107	0.0065789	1.314	1661900000	21	cell cycle phase;cell cycle process;cell division;cellular component organization;cellular component organization at cellular level;cellular component organization or biogenesis;cellular component organization or biogenesis at cellular level;cellular macromolecule metabolic process;cellular metabolic process;cellular nitrogen compound metabolic process;cellular process;cellular response to stimul…	binding;DNA binding;double-stranded DNA binding;nucleic acid binding;structure-specific DNA binding	cell part;chromosomal part;condensed chromosome kinetochore;FANCM-MHF complex;Fanconi anaemia nuclear complex;intracellular non-membrane-bounded organelle;intracellular organelle;intracellular organelle part;intracellular part;kinetochore;macromolecular complex;non-membrane-bounded organelle;nuclear part;nucleoplasm part;organelle;organelle part;protein complex		Alternativesplicing;Cellcycle;Celldivision;Centromere;Chromosome;Completeproteome;DNA-binding;DNAdamage;DNArepair;Kinetochore;Mitosis;Nucleus;Referenceproteome
Q9DBG6;A2ACG7	Q9DBG6;A2ACG7	Dolichyl-diphosphooligosaccharide--protein glycosyltransferase subunit 2	Rpn2	31.3916	31.5499	31.2339	31.2459	31.1965	31.4616	31.4211	31.4281	31.162	31.34		0.152245	0.756995	0.0495869	16	16	16	40.7	40.7	40.7	69.062	0	323.31	134620000000	336	aging;carbohydrate metabolic process;cellular carbohydrate metabolic process;cellular macromolecule metabolic process;cellular metabolic process;cellular process;cellular protein metabolic process;developmental process;glycosylation;macromolecule glycosylation;macromolecule metabolic process;macromolecule modification;metabolic process;peptidyl-amino acid modification;peptidyl-asparagine modifica…	binding;catalytic activity;dolichyl-diphosphooligosaccharide-protein glycotransferase activity;oligosaccharyl transferase activity;ribonucleoprotein binding;ribosome binding;transferase activity;transferase activity, transferring glycosyl groups;transferase activity, transferring hexosyl groups	autophagic vacuole membrane;cell part;cytoplasmic part;endoplasmic reticulum;endoplasmic reticulum part;integral to membrane;intracellular membrane-bounded organelle;intracellular organelle;intracellular organelle part;intracellular part;intrinsic to membrane;macromolecular complex;membrane;membrane part;membrane-bounded organelle;nucleus;oligosaccharyltransferase complex;organelle;organelle memb…	N-Glycan biosynthesis;Protein processing in endoplasmic reticulum;Various types of N-glycan biosynthesis	Completeproteome;Endoplasmicreticulum;Glycoprotein;Glycosyltransferase;Isopeptidebond;Membrane;Referenceproteome;Signal;Transferase;Transmembrane;Transmembranehelix;Ublconjugation
Q8K4Q0;A2ACM0;Q8K4Q0-3;Q8K4Q0-2;F7BQS0;Q8K4Q0-4	Q8K4Q0;A2ACM0;Q8K4Q0-3;Q8K4Q0-2	Regulatory-associated protein of mTOR	Rptor	27.656	NaN	NaN	NaN	NaN	27.2857	NaN	NaN	NaN	NaN		0	0.965338	-0.37026	3	3	3	3.4	3.4	3.4	149.47	0	10.869	2573400000	5	biological regulation;cell communication;cell growth;cellular component organization;cellular component organization or biogenesis;cellular process;cellular response to acid;cellular response to amine stimulus;cellular response to amino acid stimulus;cellular response to chemical stimulus;cellular response to endogenous stimulus;cellular response to external stimulus;cellular response to extracel…	5S rDNA binding;binding;DNA binding;nucleic acid binding;rDNA binding;regulatory region DNA binding;regulatory region nucleic acid binding;RNA polymerase III regulatory region DNA binding;RNA polymerase III type 1 promoter DNA binding;RNA polymerase III type 2 promoter DNA binding;RNA polymerase III type 3 promoter DNA binding;sequence-specific DNA binding;transcription regulatory region DNA bind…	cell part;cytoplasmic part;intracellular membrane-bounded organelle;intracellular organelle;intracellular part;lysosome;lytic vacuole;macromolecular complex;membrane-bounded organelle;organelle;protein complex;TORC1 complex;vacuole	Insulin signaling pathway;mTOR signaling pathway	Alternativesplicing;Completeproteome;Cytoplasm;Lysosome;Phosphoprotein;Referenceproteome;Repeat;WDrepeat
Q80TQ5;A2ADE0;Z4YJW6;Q80TQ5-3;Q80TQ5-2	Q80TQ5;A2ADE0;Z4YJW6;Q80TQ5-3;Q80TQ5-2	Pleckstrin homology domain-containing family M member 2	Plekhm2	NaN	NaN	NaN	NaN	NaN	NaN	NaN	NaN	21.5904	NaN		-4.34294e-08	1	0	2	2	2	2.7	2.7	2.7	112.73	0.0021818	1.5959	111800000	2	cellular component organization;cellular component organization at cellular level;cellular component organization or biogenesis;cellular component organization or biogenesis at cellular level;cellular process;Golgi organization;organelle organization	binding;lipid binding;phospholipid binding	cell part;cytoplasm;intracellular part		Alternativesplicing;Completeproteome;Cytoplasm;Phosphoprotein;Referenceproteome
Q71FD7;A2ADE7	Q71FD7;A2ADE7	Filamin-binding LIM protein 1	Fblim1	25.6292	NaN	NaN	NaN	NaN	NaN	NaN	NaN	NaN	NaN		0	0.964906	NaN	1	1	1	8.3	8.3	8.3	41.026	0	5.0812	73574000	1	biological adhesion;biological regulation;cell adhesion;cell-cell adhesion;cellular process;regulation of anatomical structure morphogenesis;regulation of biological process;regulation of biological quality;regulation of cell morphogenesis;regulation of cell shape;regulation of cellular component biogenesis;regulation of cellular component organization;regulation of cellular process;regulation of…	binding;cation binding;cytoskeletal protein binding;filamin binding;ion binding;metal ion binding;protein binding;transition metal ion binding;zinc ion binding	actin filament bundle;actomyosin;adherens junction;anchoring junction;cell cortex;cell junction;cell part;cell-substrate adherens junction;cell-substrate junction;cytoplasmic part;cytoskeletal part;focal adhesion;intracellular membrane-bounded organelle;intracellular organelle;intracellular organelle part;intracellular part;membrane-bounded organelle;organelle;organelle part;stress fiber		Celladhesion;Celljunction;Cellshape;Completeproteome;Cytoplasm;Cytoskeleton;LIMdomain;Metal-binding;Referenceproteome;Repeat;Zinc
F6TBV1;F6WHL0;A2ADH1;Q9CQY5-2;Q9CQY5-3;Q9CQY5	F6TBV1;F6WHL0;A2ADH1;Q9CQY5-2;Q9CQY5-3;Q9CQY5	Magnesium transporter protein 1	Magt1	26.4347	NaN	NaN	NaN	NaN	26.4643	NaN	NaN	NaN	NaN		0	0.964474	0.0296001	2	2	2	6.1	6.1	6.1	35.154	0.00027211	2.5857	2234600000	21	biological regulation;cell redox homeostasis;cellular homeostasis;cellular process;cognition;homeostatic process;multicellular organismal process;neurological system process;regulation of biological process;regulation of biological quality;regulation of cellular process;system process	cation transmembrane transporter activity;divalent inorganic cation transmembrane transporter activity;inorganic cation transmembrane transporter activity;ion transmembrane transporter activity;magnesium ion transmembrane transporter activity;metal ion transmembrane transporter activity;substrate-specific transmembrane transporter activity;substrate-specific transporter activity;transmembrane tra…	cell part;cytoplasmic part;endoplasmic reticulum part;integral to membrane;intracellular organelle part;intracellular part;intrinsic to membrane;macromolecular complex;membrane;membrane part;oligosaccharyltransferase complex;organelle part;plasma membrane;protein complex		Alternativesplicing;Cellmembrane;Completeproteome;Disulfidebond;Endoplasmicreticulum;Glycoprotein;Magnesium;Membrane;Referenceproteome;Signal;Transmembrane;Transmembranehelix;Transport
Q8R3G1;A2ADR8	Q8R3G1;A2ADR8	Nuclear inhibitor of protein phosphatase 1	Ppp1r8	NaN	NaN	NaN	NaN	NaN	NaN	NaN	NaN	NaN	NaN		-4.34294e-08	1	0	2	2	2	10	10	10	38.527	0	7.0781	412810000	8	biological regulation;biosynthetic process;cell proliferation;cellular biosynthetic process;cellular macromolecule biosynthetic process;cellular macromolecule metabolic process;cellular metabolic process;cellular nitrogen compound metabolic process;cellular process;developmental process;macromolecule biosynthetic process;macromolecule metabolic process;metabolic process;mRNA metabolic process;mRN…	binding;DNA binding;enzyme inhibitor activity;enzyme regulator activity;nucleic acid binding;phosphatase inhibitor activity;phosphatase regulator activity;protein phosphatase inhibitor activity;protein phosphatase regulator activity;protein phosphatase type 1 regulator activity;RNA binding	cell part;intracellular organelle part;intracellular part;macromolecular complex;nuclear body;nuclear part;nuclear speck;nucleoplasm part;organelle part;ribonucleoprotein complex;spliceosomal complex		3D-structure;Completeproteome;Developmentalprotein;DNA-binding;mRNAprocessing;mRNAsplicing;Nucleus;Phosphoprotein;Proteinphosphataseinhibitor;Referenceproteome;Repressor;RNA-binding;Spliceosome;Transcription;Transcriptionregulation
Q63ZW7;A2ADS6;Q63ZW7-4;Q63ZW7-3;Q63ZW7-2	Q63ZW7;A2ADS6;Q63ZW7-4;Q63ZW7-3;Q63ZW7-2	InaD-like protein	Inadl	NaN	NaN	NaN	NaN	NaN	NaN	NaN	NaN	NaN	NaN		-4.34294e-08	1	0	1	1	1	0.6	0.6	0.6	198.51	0.007623	1.2088	7429800000	13			apical part of cell;apical plasma membrane;cell junction;cell part;cell-cell junction;cytoplasmic part;intracellular part;membrane part;occluding junction;perinuclear region of cytoplasm;plasma membrane part;tight junction	Tight junction	3D-structure;Alternativesplicing;Celljunction;Cellmembrane;Completeproteome;Cytoplasm;Membrane;Phosphoprotein;Referenceproteome;Repeat;Tightjunction
A2ADY9	A2ADY9	Protein DDI1 homolog 2	Ddi2	NaN	NaN	NaN	NaN	NaN	NaN	NaN	NaN	NaN	NaN		-4.34294e-08	1	0	3	3	3	11.3	11.3	11.3	44.59	0	7.7081	571650000	13	macromolecule metabolic process;metabolic process;primary metabolic process;protein metabolic process;proteolysis	aspartic-type endopeptidase activity;aspartic-type peptidase activity;catalytic activity;endopeptidase activity;hydrolase activity;peptidase activity;peptidase activity, acting on L-amino acid peptides			Completeproteome;Phosphoprotein;Referenceproteome
Q9DBT5;A2AE27;O08739	Q9DBT5;A2AE27	AMP deaminase 2	Ampd2	NaN	NaN	25.912	NaN	NaN	25.6065	25.1543	25.7167	NaN	NaN		0	0.964043	-0.531565	7	7	7	8.6	8.6	8.6	92.023	0	39.321	1745300000	15	biosynthetic process;cellular biosynthetic process;cellular metabolic compound salvage;cellular metabolic process;cellular nitrogen compound biosynthetic process;cellular nitrogen compound metabolic process;cellular process;heterocycle biosynthetic process;heterocycle metabolic process;IMP biosynthetic process;IMP metabolic process;IMP salvage;metabolic process;nitrogen compound metabolic process…	AMP deaminase activity;binding;catalytic activity;cation binding;deaminase activity;hydrolase activity;hydrolase activity, acting on carbon-nitrogen (but not peptide) bonds;hydrolase activity, acting on carbon-nitrogen (but not peptide) bonds, in cyclic amidines;ion binding;metal ion binding		Purine metabolism	Completeproteome;Hydrolase;Metal-binding;Nucleotidemetabolism;Phosphoprotein;Referenceproteome;Zinc
O89104;F7B2D1;A2AE45	O89104;F7B2D1;A2AE45	Synaptophysin-like protein 2	Sypl2	25.6535	25.2417	25.1313	25.1138	24.2559	26.2412	27.0058	27.8606	27.621	28.4599	+	1.44969	0.0123207	1.28136	2	2	2	8.7	8.7	8.7	29.224	0	67.232	4825400000	26	biological regulation;calcium ion homeostasis;cation homeostasis;cellular calcium ion homeostasis;cellular cation homeostasis;cellular chemical homeostasis;cellular divalent inorganic cation homeostasis;cellular homeostasis;cellular ion homeostasis;cellular metal ion homeostasis;cellular process;chemical homeostasis;divalent inorganic cation homeostasis;homeostatic process;ion homeostasis;metal i…	transporter activity	cell part;clathrin-coated vesicle;coated vesicle;cytoplasmic membrane-bounded vesicle;cytoplasmic part;cytoplasmic vesicle;integral to membrane;intracellular membrane-bounded organelle;intracellular organelle;intracellular part;intrinsic to membrane;membrane part;membrane-bounded organelle;membrane-bounded vesicle;organelle;synapse part;synaptic vesicle;vesicle		Completeproteome;Glycoprotein;Membrane;Referenceproteome;Transmembrane;Transmembranehelix
Q9R0Q4;A2AEB5;A2AEB4;A2AEB3;A2AEB8;A2AEB7;A2AEB6	Q9R0Q4;A2AEB5;A2AEB4;A2AEB3;A2AEB8;A2AEB7;A2AEB6	Mortality factor 4-like protein 2	Morf4l2	NaN	NaN	NaN	NaN	NaN	NaN	NaN	NaN	NaN	NaN		-4.34294e-08	1	0	2	2	2	6.9	6.9	6.9	32.183	0.0082911	1.1909	242970000	10	biological regulation;biosynthetic process;cellular biosynthetic process;cellular component organization;cellular component organization at cellular level;cellular component organization or biogenesis;cellular component organization or biogenesis at cellular level;cellular macromolecule biosynthetic process;cellular macromolecule metabolic process;cellular metabolic process;cellular nitrogen comp…		cell part;intracellular non-membrane-bounded organelle;intracellular organelle;intracellular organelle part;intracellular part;non-membrane-bounded organelle;nuclear part;nucleolus;organelle;organelle part		Chromatinregulator;Completeproteome;DNAdamage;DNArepair;Growthregulation;Nucleus;Phosphoprotein;Referenceproteome;Transcription;Transcriptionregulation
Q8CCT4;Q9DB24;Q8R0A5;A2AEC2	Q8CCT4;Q9DB24;Q8R0A5;A2AEC2	Transcription elongation factor A protein-like 5;Transcription elongation factor A protein-like 3	Tceal5;Tceal6;Tceal3	26.523	26.2738	26.4039	NaN	26.1725	NaN	NaN	NaN	NaN	NaN		0	0.963612	NaN	2	2	2	9	9	9	22.038	0.00027322	2.6174	410070000	14	biological regulation;biosynthetic process;cellular biosynthetic process;cellular macromolecule biosynthetic process;cellular macromolecule metabolic process;cellular metabolic process;cellular nitrogen compound metabolic process;cellular process;macromolecule biosynthetic process;macromolecule metabolic process;metabolic process;nitrogen compound metabolic process;nucleic acid metabolic process;…	binding;nucleic acid binding;RNA binding;translation elongation factor activity;translation factor activity, nucleic acid binding	cell part;intracellular membrane-bounded organelle;intracellular organelle;intracellular part;membrane-bounded organelle;nucleus;organelle		Completeproteome;Elongationfactor;Nucleus;Phosphoprotein;Proteinbiosynthesis;Referenceproteome;Transcription;Transcriptionregulation
Q9D0P7;A2AEE4	Q9D0P7;A2AEE4	Proline/serine-rich coiled-coil protein 1	Psrc1	NaN	NaN	NaN	NaN	NaN	NaN	NaN	NaN	NaN	NaN		-4.34294e-08	1	0	1	1	1	2.7	2.7	2.7	34.706	0.0072481	1.2785	453810000	19	biological regulation;cell cycle process;cell division;cellular component organization;cellular component organization at cellular level;cellular component organization or biogenesis;cellular component organization or biogenesis at cellular level;cellular process;cytoskeleton organization;establishment of chromosome localization;establishment of localization;establishment of localization in cell;…	binding;cytoskeletal protein binding;microtubule binding;protein binding;tubulin binding	cell part;cytoplasmic part;cytoskeletal part;cytosol;intracellular non-membrane-bounded organelle;intracellular organelle;intracellular organelle part;intracellular part;macromolecular complex;microtubule;midbody;non-membrane-bounded organelle;organelle;organelle part;protein complex;spindle;spindle microtubule;spindle pole		Cellcycle;Celldivision;Coiledcoil;Completeproteome;Cytoplasm;Cytoskeleton;Mitosis;Phosphoprotein;Referenceproteome;Repeat
Q8BIQ5;A2AEK1;Q8BIQ5-2;A2AEJ8;Q8C7E9;F6ZKC7	Q8BIQ5;A2AEK1;Q8BIQ5-2;A2AEJ8	Cleavage stimulation factor subunit 2	Cstf2	26.2193	25.9801	26.6694	26.4781	NaN	26.3797	26.2544	26.5973	26.0371	26.1472		0.034297	0.9148	0.0274385	3	3	3	9.3	9.3	9.3	61.341	0	10.46	3078900000	51	cellular macromolecule metabolic process;cellular metabolic process;cellular nitrogen compound metabolic process;cellular process;macromolecule metabolic process;metabolic process;mRNA 3'-end processing;mRNA metabolic process;mRNA polyadenylation;mRNA processing;nitrogen compound metabolic process;nucleic acid metabolic process;nucleobase-containing compound metabolic process;primary metabolic pr…	binding;nucleic acid binding;nucleotide binding;RNA binding	cell part;cleavage body;intracellular membrane-bounded organelle;intracellular organelle;intracellular organelle part;intracellular part;macromolecular complex;membrane-bounded organelle;mRNA cleavage and polyadenylation specificity factor complex;mRNA cleavage factor complex;nuclear body;nuclear part;nucleoplasm part;nucleus;organelle;organelle part;protein complex	mRNA surveillance pathway	Alternativesplicing;Completeproteome;mRNAprocessing;Nucleus;Phosphoprotein;Referenceproteome;Repeat;RNA-binding
Q99LI2;A2AEM2	Q99LI2;A2AEM2	Chloride channel CLIC-like protein 1	Clcc1	28.9182	NaN	28.7906	28.6511	NaN	NaN	NaN	28.3632	NaN	NaN		0	0.963181	NaN	4	4	4	10.9	10.9	10.9	60.621	0	14.07	7025500000	8			cell part;cytoplasmic part;endoplasmic reticulum;Golgi apparatus;integral to membrane;intracellular membrane-bounded organelle;intracellular organelle;intracellular part;intrinsic to membrane;membrane part;membrane-bounded organelle;nucleus;organelle		Completeproteome;Endoplasmicreticulum;Golgiapparatus;Membrane;Nucleus;Phosphoprotein;Referenceproteome;Signal;Transmembrane;Transmembranehelix
Q8VD04;A2AEW6;A2AEW5;A2AEW9;A2AEW8	Q8VD04;A2AEW6;A2AEW5;A2AEW9;A2AEW8	GRIP1-associated protein 1	Gripap1	NaN	NaN	NaN	NaN	NaN	NaN	NaN	NaN	NaN	NaN		-4.34294e-08	1	0	4	4	4	5.3	5.3	5.3	92.714	0	21.299	1517000000	7			cell part;cytoplasmic part;early endosome;endosome;intracellular membrane-bounded organelle;intracellular organelle;intracellular part;membrane-bounded organelle;organelle		Coiledcoil;Completeproteome;Endosome;Phosphoprotein;Referenceproteome
P97447;A2AEX8;A2AEX6;P97447-2;A2AEX7;A2AEY1;A2AEY2;A2AEY0;A2AEX9;Q8CDC8	P97447;A2AEX8;A2AEX6;P97447-2;A2AEX7;A2AEY1;A2AEY2;A2AEY0	Four and a half LIM domains protein 1	Fhl1	30.2534	29.9285	29.9245	29.8793	29.8894	29.8625	29.7964	29.6002	29.4601	29.6327		0.61091	0.256432	-0.20596	8	8	8	26.8	26.8	26.8	31.888	0	75.768	42520000000	96	biological regulation;cell differentiation;cellular developmental process;cellular process;developmental process;multicellular organismal development;multicellular organismal process;negative regulation of biological process;negative regulation of cell cycle;negative regulation of cell cycle process;negative regulation of cell growth;negative regulation of cellular process;negative regulation of …	binding;cation binding;ion binding;metal ion binding;transition metal ion binding;zinc ion binding	cell part;cytoplasm;intracellular membrane-bounded organelle;intracellular organelle;intracellular part;membrane;membrane-bounded organelle;nucleus;organelle;plasma membrane		Alternativesplicing;Completeproteome;Cytoplasm;Developmentalprotein;Differentiation;LIMdomain;Metal-binding;Nucleus;Referenceproteome;Repeat;Zinc;Zinc-finger
A2AF47;A2AF67;A2AF65	A2AF47;A2AF67;A2AF65	Dedicator of cytokinesis protein 11	Dock11	NaN	NaN	NaN	NaN	NaN	26.2051	25.8816	26.5717	NaN	26.9245		0	0.962751	NaN	13	13	11	6.4	6.4	5.6	237.77	0	15.099	2561100000	28	biological regulation;cellular process;cellular response to stimulus;intracellular signal transduction;regulation of biological process;regulation of cellular process;response to stimulus;signal transduction;small GTPase mediated signal transduction	binding;enzyme regulator activity;GTPase regulator activity;guanyl-nucleotide exchange factor activity;lipid binding;nucleoside-triphosphatase regulator activity;phospholipid binding;Ras guanyl-nucleotide exchange factor activity;Rho guanyl-nucleotide exchange factor activity;small GTPase regulator activity			Completeproteome;Guanine-nucleotidereleasingfactor;Phosphoprotein;Referenceproteome
O35638;A2AFF6;D6RHQ7	O35638;A2AFF6	Cohesin subunit SA-2	Stag2	NaN	25.6445	NaN	NaN	NaN	NaN	NaN	NaN	NaN	NaN		0	0.962321	NaN	4	2	2	3.1	1.7	1.7	141.28	0	3.166	551030000	3	biological regulation;cell cycle phase;cell cycle process;cell division;cellular component organization;cellular component organization at cellular level;cellular component organization or biogenesis;cellular component organization or biogenesis at cellular level;cellular process;chromosome organization;developmental process;meiosis;mitosis;negative regulation of biological process;negative regul…		cell part;chromatin;chromosomal part;chromosome, centromeric region;intracellular organelle part;intracellular part;nuclear part;nucleoplasm;organelle part	Cell cycle;Cell cycle - yeast;Meiosis - yeast	Acetylation;Cellcycle;Celldivision;Centromere;Chromosome;Chromosomepartition;Completeproteome;Meiosis;Mitosis;Nucleus;Phosphoprotein;Referenceproteome
B9EI38;A2AFI8;B1AV20;Q80XA6	B9EI38;A2AFI8;B1AV20;Q80XA6	RalBP1-associated Eps domain-containing protein 2	Reps2	NaN	NaN	NaN	NaN	NaN	NaN	NaN	NaN	NaN	NaN		-4.34294e-08	1	0	5	5	4	10.3	10.3	10.3	70.612	0	9.6162	549210000	16	cellular component organization;cellular component organization or biogenesis;cellular membrane organization;cellular process;endocytosis;establishment of localization;membrane invagination;membrane organization;receptor-mediated endocytosis;transport;vesicle-mediated transport	binding;calcium ion binding;cation binding;ion binding;metal ion binding	cell part;cytoplasm;intracellular part		Calcium;Coiledcoil;Completeproteome;Cytoplasm;Metal-binding;Phosphoprotein;Referenceproteome
Q60973;A2AFI9;A2AFJ1;F6ZLC6;F6U539	Q60973;A2AFI9;A2AFJ1;F6ZLC6	Histone-binding protein RBBP7	Rbbp7	26.766	27.0887	26.8924	26.8658	26.3581	26.6546	27.3186	26.9481	26.8424	26.5452		0.0896171	0.795773	0.0709194	11	5	5	31.1	20.2	20.2	47.789	0	259.27	3783000000	35	biological regulation;biosynthetic process;cellular biosynthetic process;cellular component organization;cellular component organization at cellular level;cellular component organization or biogenesis;cellular component organization or biogenesis at cellular level;cellular heat acclimation;cellular macromolecule biosynthetic process;cellular macromolecule metabolic process;cellular metabolic proc…		cell part;chromatin remodeling complex;ESC/E(Z) complex;histone deacetylase complex;histone methyltransferase complex;intracellular organelle part;intracellular part;macromolecular complex;methyltransferase complex;nuclear part;nucleoplasm part;NuRD complex;organelle part;PcG protein complex;protein complex;transcriptional repressor complex		Acetylation;Chaperone;Chromatinregulator;Completeproteome;Directproteinsequencing;DNAreplication;Isopeptidebond;Nucleus;Phosphoprotein;Referenceproteome;Repeat;Repressor;Transcription;Transcriptionregulation;Ublconjugation;WDrepeat
Q8K4I3;A2AFJ8;F6WMJ3;H3BKQ0;H3BJ53	Q8K4I3;A2AFJ8;F6WMJ3	Rho guanine nucleotide exchange factor 6	Arhgef6	NaN	NaN	NaN	NaN	NaN	NaN	NaN	NaN	NaN	NaN		-4.34294e-08	1	0	4	2	2	5.4	2.5	2.5	87.051	0	7.6984	475830000	26	biological regulation;cell projection assembly;cell projection organization;cellular component assembly;cellular component assembly at cellular level;cellular component organization;cellular component organization at cellular level;cellular component organization or biogenesis;cellular component organization or biogenesis at cellular level;cellular process;cellular response to stimulus;intracellu…	binding;enzyme regulator activity;GTPase regulator activity;guanyl-nucleotide exchange factor activity;lipid binding;nucleoside-triphosphatase regulator activity;phospholipid binding;Ras guanyl-nucleotide exchange factor activity;Rho guanyl-nucleotide exchange factor activity;small GTPase regulator activity	cell part;cell projection;cytoplasm;intracellular;intracellular part;lamellipodium	Pancreatic cancer;Regulation of actin cytoskeleton	3D-structure;Cellprojection;Completeproteome;Guanine-nucleotidereleasingfactor;Phosphoprotein;Referenceproteome;SH3domain
Q7TMY8;A2AFQ0;Q7TMY8-3;Q7TMY8-4;Q7TMY8-2;F6XP90	Q7TMY8;A2AFQ0;Q7TMY8-3;Q7TMY8-4;Q7TMY8-2	E3 ubiquitin-protein ligase HUWE1	Huwe1	26.0939	26.2039	26.2348	26.1007	26.0059	26.4854	26.0819	26.038	NaN	25.8527		0.255656	0.572554	0.106112	12	12	12	3	3	3	482.63	0	17.167	2378600000	34	base-excision repair;cell differentiation;cellular component organization;cellular component organization at cellular level;cellular component organization or biogenesis;cellular component organization or biogenesis at cellular level;cellular developmental process;cellular macromolecule metabolic process;cellular metabolic process;cellular nitrogen compound metabolic process;cellular process;cell…	acid-amino acid ligase activity;binding;catalytic activity;DNA binding;ligase activity;ligase activity, forming carbon-nitrogen bonds;nucleic acid binding;small conjugating protein ligase activity;ubiquitin-protein ligase activity	cell part;cytoplasm;intracellular membrane-bounded organelle;intracellular organelle;intracellular part;membrane-bounded organelle;nucleus;organelle	Ubiquitin mediated proteolysis	Alternativesplicing;Completeproteome;Cytoplasm;Differentiation;Directproteinsequencing;DNA-binding;DNAdamage;DNArepair;Ligase;Nucleus;Phosphoprotein;Referenceproteome;Ublconjugationpathway
Q8VCT9;A2AGE0;A2AGD9	Q8VCT9;A2AGE0;A2AGD9	Dual specificity testis-specific protein kinase 2	Tesk2	NaN	NaN	NaN	NaN	NaN	NaN	25.3307	NaN	NaN	NaN		0	0.961892	NaN	1	1	1	1.2	1.2	1.2	63.469	0.0095411	1.1164	793610000	1	actin cytoskeleton organization;actin filament-based process;cell junction assembly;cell junction organization;cell-substrate junction assembly;cellular component assembly;cellular component assembly at cellular level;cellular component organization;cellular component organization at cellular level;cellular component organization or biogenesis;cellular component organization or biogenesis at cell…	adenyl nucleotide binding;adenyl ribonucleotide binding;ATP binding;binding;catalytic activity;cation binding;ion binding;kinase activity;metal ion binding;nucleotide binding;phosphotransferase activity, alcohol group as acceptor;protein kinase activity;protein serine/threonine kinase activity;protein serine/threonine/tyrosine kinase activity;protein tyrosine kinase activity;purine nucleotide bin…	cell part;cytoplasm;intracellular membrane-bounded organelle;intracellular organelle;intracellular part;membrane-bounded organelle;nucleus;organelle		ATP-binding;Completeproteome;Kinase;Magnesium;Manganese;Metal-binding;Nucleotide-binding;Nucleus;Phosphoprotein;Referenceproteome;Serine/threonine-proteinkinase;Transferase;Tyrosine-proteinkinase
Q9D9K3;A2AGL5	Q9D9K3;A2AGL5	Cell death regulator Aven	Aven	NaN	NaN	NaN	NaN	NaN	22.1281	NaN	NaN	NaN	NaN		0	0.961463	NaN	1	1	1	2.9	2.9	2.9	37.195	0.0021855	1.6084	93733000	3	apoptosis;biological regulation;cell death;cellular process;death;negative regulation of apoptosis;negative regulation of biological process;negative regulation of cell death;negative regulation of cellular process;negative regulation of programmed cell death;programmed cell death;regulation of apoptosis;regulation of biological process;regulation of cell death;regulation of cellular process;regu…		cell part;endomembrane system;intracellular;membrane		Apoptosis;Completeproteome;Membrane;Phosphoprotein;Referenceproteome
O88685;A2AGN7;B7ZCF1;A0A087WPH7;F6Q2E3	O88685;A2AGN7;B7ZCF1;A0A087WPH7;F6Q2E3	26S protease regulatory subunit 6A	Psmc3	27.516	27.6137	27.7497	26.8825	27.7029	27.9616	28.1014	27.9664	27.8681	27.5004	+	1.5465	0.0347961	0.405037	5	5	5	12	12	12	49.548	0	19.138	8696100000	38	anatomical structure development;blastocyst development;catabolic process;developmental process;macromolecule catabolic process;macromolecule metabolic process;metabolic process;primary metabolic process;protein catabolic process;protein metabolic process	adenyl nucleotide binding;adenyl ribonucleotide binding;ATP binding;binding;catalytic activity;hydrolase activity;hydrolase activity, acting on acid anhydrides;hydrolase activity, acting on acid anhydrides, in phosphorus-containing anhydrides;nucleoside-triphosphatase activity;nucleotide binding;purine nucleotide binding;purine ribonucleoside triphosphate binding;purine ribonucleotide binding;pyr…	cell part;cytoplasm;cytoplasmic mRNA processing body;cytoplasmic part;intracellular membrane-bounded organelle;intracellular non-membrane-bounded organelle;intracellular organelle;intracellular part;macromolecular complex;membrane-bounded organelle;non-membrane-bounded organelle;nucleus;organelle;perinuclear region of cytoplasm;proteasome accessory complex;protein complex;ribonucleoprotein comple…	Proteasome	ATP-binding;Completeproteome;Cytoplasm;Nucleotide-binding;Nucleus;Phosphoprotein;Proteasome;Referenceproteome
Q4QQM4;A2AGS6	Q4QQM4;A2AGS6	Tumor protein p53-inducible protein 11	Trp53i11	27.9962	27.8162	27.5398	27.469	27.2057	27.3313	27.527	27.8506	27.1894	28.1123		0.815968	0.123337	-0.354861	3	3	3	18	18	18	20.91	0	12.009	3014500000	31			cell part;integral to membrane;intrinsic to membrane;membrane part		Completeproteome;Membrane;Phosphoprotein;Referenceproteome;Transmembrane;Transmembranehelix
A2AGT5;Z4YL78;K3W4R5;A2AGT5-2;A2AGT5-3	A2AGT5;Z4YL78;K3W4R5;A2AGT5-2;A2AGT5-3	Cytoskeleton-associated protein 5	Ckap5	26.3431	26.3957	26.3029	26.4343	26.1611	27.1568	26.8603	26.9255	26.3659	26.7552	+	1.97227	0.0110374	0.661292	16	16	16	9.6	9.6	9.6	225.63	0	59.128	3786900000	109	cell cycle phase;cell cycle process;cell division;cellular component organization;cellular component organization at cellular level;cellular component organization or biogenesis;cellular component organization or biogenesis at cellular level;cellular process;establishment of localization;establishment of RNA localization;mitosis;nuclear division;nucleic acid transport;nucleobase-containing compou…		cell part;cytoplasm;cytoplasmic part;cytoskeletal part;intracellular organelle part;intracellular part;macromolecular complex;microtubule organizing center;organelle part;protein complex;spindle pole		Acetylation;Alternativesplicing;Cellcycle;Celldivision;Completeproteome;Cytoplasm;Cytoskeleton;Mitosis;Phosphoprotein;Referenceproteome;Repeat
Q5FWK3;A2AH25	Q5FWK3;A2AH25	Rho GTPase-activating protein 1	Arhgap1	29.0781	28.5289	28.6823	28.8732	28.6738	28.9409	28.9038	28.9531	28.7086	28.6634		0.295447	0.483626	0.159228	10	10	10	28.5	28.5	28.5	50.41	0	65.083	16440000000	93	biological regulation;cellular process;cellular response to stimulus;intracellular signal transduction;regulation of biological process;regulation of cellular process;response to stimulus;signal transduction;small GTPase mediated signal transduction	enzyme activator activity;enzyme regulator activity;GTPase activator activity;GTPase regulator activity;nucleoside-triphosphatase regulator activity;Rac GTPase activator activity;Ras GTPase activator activity;Rho GTPase activator activity;small GTPase regulator activity	cell part;cell projection;cytoplasm;intracellular membrane-bounded organelle;intracellular organelle;intracellular part;membrane;membrane-bounded organelle;organelle;plasma membrane;ruffle		Acetylation;Completeproteome;Cytoplasm;GTPaseactivation;Phosphoprotein;Referenceproteome;SH3-binding
O08810;A2AH85;G3UZ34;G3UXK8	O08810;A2AH85;G3UZ34	116 kDa U5 small nuclear ribonucleoprotein component	Eftud2	28.6777	29.0612	29.0146	28.8618	28.6802	29.3093	29.1617	28.9499	28.7547	28.9576		0.82236	0.134672	0.317637	22	21	21	26.8	25.7	25.7	109.36	0	75.231	19111000000	192	catabolic process;cellular catabolic process;cellular macromolecule metabolic process;cellular metabolic process;cellular nitrogen compound catabolic process;cellular nitrogen compound metabolic process;cellular process;GTP catabolic process;GTP metabolic process;heterocycle catabolic process;heterocycle metabolic process;macromolecule metabolic process;metabolic process;mRNA metabolic process;mR…	binding;catalytic activity;GTP binding;GTPase activity;guanyl nucleotide binding;guanyl ribonucleotide binding;hydrolase activity;hydrolase activity, acting on acid anhydrides;hydrolase activity, acting on acid anhydrides, in phosphorus-containing anhydrides;nucleic acid binding;nucleoside-triphosphatase activity;nucleotide binding;purine nucleotide binding;purine ribonucleoside triphosphate bind…	Cajal body;catalytic step 2 spliceosome;cell part;cytoplasm;intracellular membrane-bounded organelle;intracellular organelle;intracellular organelle part;intracellular part;macromolecular complex;membrane-bounded organelle;nuclear body;nuclear part;nuclear speck;nucleoplasm part;nucleus;organelle;organelle part;ribonucleoprotein complex;spliceosomal complex	Spliceosome	Acetylation;Completeproteome;Elongationfactor;GTP-binding;mRNAprocessing;mRNAsplicing;Nucleotide-binding;Nucleus;Phosphoprotein;Proteinbiosynthesis;Referenceproteome;Spliceosome
Q80U87;A2AI52	Q80U87;A2AI52	Ubiquitin carboxyl-terminal hydrolase 8;Ubiquitin carboxyl-terminal hydrolase	Usp8	NaN	NaN	NaN	NaN	NaN	NaN	NaN	NaN	NaN	NaN		-4.34294e-08	1	0	2	2	2	1.9	1.9	1.9	122.61	0.0014859	1.7597	137210000	2	biological regulation;catabolic process;cell cycle;cell cycle cytokinesis;cell cycle process;cellular catabolic process;cellular component organization;cellular component organization at cellular level;cellular component organization or biogenesis;cellular component organization or biogenesis at cellular level;cellular macromolecule catabolic process;cellular macromolecule metabolic process;cellu…	catalytic activity;cysteine-type peptidase activity;hydrolase activity;hydrolase activity, acting on ester bonds;peptidase activity;peptidase activity, acting on L-amino acid peptides;small conjugating protein-specific protease activity;thiolester hydrolase activity;ubiquitin thiolesterase activity;ubiquitin-specific protease activity	cell part;cytoplasmic part;cytosol;early endosome;endosomal part;endosome;extrinsic to endosome membrane;extrinsic to membrane;extrinsic to organelle membrane;extrinsic to plasma membrane;intracellular;intracellular membrane-bounded organelle;intracellular organelle;intracellular organelle part;intracellular part;membrane;membrane part;membrane-bounded organelle;midbody;nucleus;organelle;organell…	Endocytosis	Cellcycle;Cellmembrane;Completeproteome;Cytoplasm;Endosome;Hydrolase;Membrane;Nucleus;Phosphoprotein;Protease;Referenceproteome;SH3-binding;Thiolprotease;Ublconjugation;Ublconjugationpathway
Q9D711;A2AIH8	Q9D711;A2AIH8	Pirin	Pir	NaN	NaN	NaN	25.0146	NaN	24.1562	NaN	NaN	24.7147	NaN		0	0.961034	NaN	2	2	2	6.9	6.9	6.9	32.066	0	2.9717	1133100000	5	cell differentiation;cellular developmental process;cellular process;developmental process;leukocyte differentiation;monocyte differentiation;myeloid cell differentiation;myeloid leukocyte differentiation	binding;catalytic activity;cation binding;dioxygenase activity;ion binding;metal ion binding;oxidoreductase activity;oxidoreductase activity, acting on single donors with incorporation of molecular oxygen;oxidoreductase activity, acting on single donors with incorporation of molecular oxygen, incorporation of two atoms of oxygen;quercetin 2,3-dioxygenase activity	cell part;cytoplasm;intracellular membrane-bounded organelle;intracellular organelle;intracellular part;membrane-bounded organelle;nucleus;organelle		Completeproteome;Cytoplasm;Dioxygenase;Iron;Metal-binding;Nucleus;Oxidoreductase;Referenceproteome
Q5DTM8;A2AIR2;Q5DTM8-2	Q5DTM8;A2AIR2;Q5DTM8-2	E3 ubiquitin-protein ligase BRE1A	Rnf20	NaN	NaN	NaN	NaN	NaN	NaN	NaN	NaN	NaN	NaN		-4.34294e-08	1	0	2	1	1	2.6	1.1	1.1	113.52	0.0074384	1.2497	116580000	1	biological regulation;catabolic process;cellular catabolic process;cellular component organization;cellular component organization at cellular level;cellular component organization or biogenesis;cellular component organization or biogenesis at cellular level;cellular macromolecule catabolic process;cellular macromolecule metabolic process;cellular metabolic process;cellular process;cellular prote…	acid-amino acid ligase activity;binding;catalytic activity;cation binding;chromatin binding;ion binding;ligase activity;ligase activity, forming carbon-nitrogen bonds;metal ion binding;protein binding transcription factor activity;small conjugating protein ligase activity;transcription coactivator activity;transcription cofactor activity;transcription factor binding transcription factor activity;…	cell part;chromosomal part;HULC complex;intracellular non-membrane-bounded organelle;intracellular organelle;intracellular organelle part;intracellular part;macromolecular complex;non-membrane-bounded organelle;nuclear part;nucleolus;organelle;organelle part;protein complex;ubiquitin conjugating enzyme complex;ubiquitin ligase complex		Acetylation;Alternativesplicing;Chromatinregulator;Coiledcoil;Completeproteome;Ligase;Metal-binding;Nucleus;Phosphoprotein;Referenceproteome;Ublconjugationpathway;Zinc;Zinc-finger
A2AIX1;E9QAT4;F7BPW6	A2AIX1;E9QAT4;F7BPW6		Sec16a	25.3768	25.5319	25.3649	NaN	NaN	26.0931	25.703	25.6264	25.6474	25.4954	+	1.21774	0.0511252	0.473511	10	10	10	6	6	6	256.47	0	27.82	2789800000	36	cellular component organization;cellular component organization at cellular level;cellular component organization or biogenesis;cellular component organization or biogenesis at cellular level;cellular process;COPII vesicle coating;endoplasmic reticulum organization;organelle organization;vesicle coating;vesicle organization		cell part;cytoplasmic part;cytosol;intracellular part		Completeproteome;Referenceproteome
A2AJ15	A2AJ15	Endoplasmic reticulum mannosyl-oligosaccharide 1,2-alpha-mannosidase	Man1b1	NaN	NaN	NaN	NaN	NaN	NaN	NaN	NaN	NaN	NaN		-4.34294e-08	1	0	4	4	4	6.4	6.4	6.4	75.149	0	5.4316	716330000	12	carbohydrate metabolic process;catabolic process;cellular carbohydrate metabolic process;cellular catabolic process;cellular macromolecule catabolic process;cellular macromolecule metabolic process;cellular metabolic process;cellular process;cellular protein metabolic process;ER-associated protein catabolic process;glycosylation;macromolecule catabolic process;macromolecule glycosylation;macromol…	binding;calcium ion binding;catalytic activity;cation binding;hydrolase activity;hydrolase activity, acting on glycosyl bonds;hydrolase activity, hydrolyzing O-glycosyl compounds;ion binding;mannosidase activity;mannosyl-oligosaccharide 1,2-alpha-mannosidase activity;mannosyl-oligosaccharide mannosidase activity;metal ion binding	cell part;cytoplasmic part;endoplasmic reticulum membrane;endoplasmic reticulum part;integral to membrane;intracellular organelle part;intracellular part;intrinsic to membrane;membrane;membrane part;organelle membrane;organelle part	N-Glycan biosynthesis;Protein processing in endoplasmic reticulum;Various types of N-glycan biosynthesis	Calcium;Completeproteome;Disulfidebond;Endoplasmicreticulum;Glycosidase;Hydrolase;Membrane;Referenceproteome;Signal-anchor;Transmembrane;Transmembranehelix
P41234;A2AJ26	P41234;A2AJ26	ATP-binding cassette sub-family A member 2	Abca2	NaN	NaN	NaN	NaN	NaN	NaN	NaN	NaN	NaN	NaN		-4.34294e-08	1	0	1	1	1	0.4	0.4	0.4	270.51	0.0021839	1.6026	96516000	1	biological regulation;chemical homeostasis;cholesterol homeostasis;establishment of localization;homeostatic process;lipid homeostasis;regulation of biological process;regulation of biological quality;regulation of biosynthetic process;regulation of cellular biosynthetic process;regulation of cellular localization;regulation of cellular macromolecule biosynthetic process;regulation of cellular me…	adenyl nucleotide binding;adenyl ribonucleotide binding;ATP binding;ATPase activity;binding;catalytic activity;hydrolase activity;hydrolase activity, acting on acid anhydrides;hydrolase activity, acting on acid anhydrides, in phosphorus-containing anhydrides;nucleoside-triphosphatase activity;nucleotide binding;purine nucleotide binding;purine ribonucleoside triphosphate binding;purine ribonucleo…	cell part;cytoplasmic membrane-bounded vesicle;cytoplasmic part;cytoplasmic vesicle;cytoskeletal part;endosomal part;endosome;endosome membrane;integral to membrane;intracellular membrane-bounded organelle;intracellular organelle;intracellular organelle part;intracellular part;intrinsic to membrane;lysosomal membrane;lysosome;lytic vacuole;membrane;membrane part;membrane-bounded organelle;membran…	ABC transporters;Lysosome	ATP-binding;Completeproteome;Endosome;Glycoprotein;Lysosome;Membrane;Nucleotide-binding;Phosphoprotein;Referenceproteome;Repeat;Transmembrane;Transmembranehelix;Transport
A2AJ72;Q3TIX6;A0A0A6YVV5;A0A0A6YY39;F7AM43;A0A0A6YX76	A2AJ72;Q3TIX6;A0A0A6YVV5		Fubp3	26.9859	26.7266	26.496	26.9275	26.6421	27.2704	27.3254	27.3373	26.8633	26.9261	+	1.25841	0.0363774	0.561762	10	9	7	24.1	22.7	16.5	61.447	0	45.703	4884400000	51	biological regulation;biosynthetic process;cellular biosynthetic process;cellular macromolecule biosynthetic process;cellular macromolecule metabolic process;cellular metabolic process;cellular nitrogen compound metabolic process;cellular process;macromolecule biosynthetic process;macromolecule metabolic process;metabolic process;nitrogen compound metabolic process;nucleic acid metabolic process;…	binding;nucleic acid binding;RNA binding	cell part;cytoplasm;intracellular membrane-bounded organelle;intracellular organelle;intracellular part;membrane-bounded organelle;nucleus;organelle		Completeproteome;Referenceproteome
A2AJ76;A2AJ76-2	A2AJ76	Hemicentin-2	Hmcn2	24.4756	NaN	NaN	24.5632	NaN	NaN	NaN	NaN	NaN	NaN		0	0.960606	NaN	6	6	6	1.5	1.5	1.5	547.19	0	4.1663	454240000	13	response to stimulus	binding;calcium ion binding;cation binding;ion binding;metal ion binding	basement membrane;cell cortex;cell junction;cell part;cytoplasmic part;extracellular matrix part;extracellular region part;intracellular part		Alternativesplicing;Calcium;Completeproteome;Disulfidebond;EGF-likedomain;Extracellularmatrix;Glycoprotein;Immunoglobulindomain;Phosphoprotein;Referenceproteome;Repeat;Secreted;Sensorytransduction;Signal
A2AJ88-3	A2AJ88-3			NaN	NaN	NaN	NaN	NaN	NaN	NaN	NaN	NaN	NaN		-4.34294e-08	1	0	1	1	1	1.4	1.4	1.4	91.941	0.0019646	1.6882	653940000	5	lipid metabolic process;metabolic process;primary metabolic process	catalytic activity;hydrolase activity	cell part;cytoplasmic part;endoplasmic reticulum;integral to membrane;intracellular membrane-bounded organelle;intracellular organelle;intracellular organelle part;intracellular part;intrinsic to membrane;lysosomal membrane;membrane;membrane part;membrane-bounded organelle;mitochondrial membrane;mitochondrial part;nuclear membrane;nuclear part;organelle;organelle membrane;organelle part;vacuolar …	Glycerophospholipid metabolism	Alternativesplicing;Completeproteome;Endoplasmicreticulum;Glycoprotein;Hydrolase;Lysosome;Membrane;Microsome;Mitochondrion;Nucleus;Phosphoprotein;Referenceproteome;Repeat;Transmembrane;Transmembranehelix
O70311;A2AJH3;Q8CFK1	O70311;A2AJH3;Q8CFK1	Glycylpeptide N-tetradecanoyltransferase 2;Glycylpeptide N-tetradecanoyltransferase	Nmt2	NaN	NaN	NaN	NaN	NaN	24.7207	NaN	NaN	NaN	NaN		0	0.960178	NaN	4	3	3	7.8	6.4	6.4	60.484	0	12.524	584330000	6	cellular macromolecule metabolic process;cellular metabolic process;cellular process;cellular protein metabolic process;macromolecule metabolic process;macromolecule modification;metabolic process;N-terminal peptidyl-glycine N-myristoylation;N-terminal protein amino acid modification;N-terminal protein lipidation;N-terminal protein myristoylation;peptidyl-amino acid modification;peptidyl-glycine …	catalytic activity;glycylpeptide N-tetradecanoyltransferase activity;myristoyltransferase activity;N-acyltransferase activity;transferase activity;transferase activity, transferring acyl groups;transferase activity, transferring acyl groups other than amino-acyl groups	cell part;cytoplasm;cytoplasmic part;Golgi apparatus;intracellular membrane-bounded organelle;intracellular organelle;intracellular part;membrane;membrane-bounded organelle;organelle;plasma membrane		Acyltransferase;Completeproteome;Cytoplasm;Phosphoprotein;Referenceproteome;Transferase
A2AJI0;A2AJI1;A8Y5P4;A2AJI0-2;F6WF36	A2AJI0;A2AJI1;A8Y5P4;A2AJI0-2;F6WF36	MAP7 domain-containing protein 1	Map7d1	NaN	NaN	NaN	NaN	NaN	26.1775	26.0027	25.6741	NaN	25.7579		0	0.959751	NaN	7	7	7	9.7	9.7	9.7	93.275	0	7.4115	2157000000	26			cell part;cytoplasm;cytoskeletal part;intracellular non-membrane-bounded organelle;intracellular organelle;intracellular organelle part;intracellular part;non-membrane-bounded organelle;organelle;organelle part;spindle		Alternativesplicing;Coiledcoil;Completeproteome;Cytoplasm;Cytoskeleton;Isopeptidebond;Phosphoprotein;Referenceproteome;Ublconjugation
A2AJK8;Q91Z38	A2AJK8;Q91Z38	Tetratricopeptide repeat protein 1	Ttc1	NaN	NaN	NaN	NaN	NaN	NaN	NaN	23.7166	NaN	NaN		-4.34294e-08	1	0	1	1	1	4	4	4	28.553	0.0076566	1.2312	230430000	6			cell part;cytoplasmic part;intracellular membrane-bounded organelle;intracellular organelle;intracellular organelle part;intracellular part;membrane;membrane-bounded organelle;microbody;microbody membrane;microbody part;organelle;organelle membrane;organelle part;peroxisomal membrane;peroxisomal part		Completeproteome;Phosphoprotein;Referenceproteome;Repeat;TPRrepeat
Q3UV70;A2AJP9;A8Y5Q0;A2AJQ0	Q3UV70;A2AJP9;A8Y5Q0;A2AJQ0	[Pyruvate dehydrogenase [acetyl-transferring]]-phosphatase 1, mitochondrial	Pdp1	26.3044	26.339	26.1521	26.5942	25.9858	26.0538	26.4362	25.973	26.1473	26.4355		0.0418965	0.912757	-0.0201648	5	5	5	13.2	13.2	13.2	61.18	0	87.722	2665500000	59	cellular macromolecule metabolic process;cellular metabolic process;cellular process;cellular protein metabolic process;dephosphorylation;macromolecule metabolic process;macromolecule modification;metabolic process;peptidyl-threonine dephosphorylation;phosphate-containing compound metabolic process;phosphorus metabolic process;primary metabolic process;protein dephosphorylation;protein metabolic …	[pyruvate dehydrogenase (lipoamide)] phosphatase activity;binding;calcium ion binding;catalytic activity;cation binding;hydrolase activity;hydrolase activity, acting on ester bonds;ion binding;metal ion binding;phosphatase activity;phosphoprotein phosphatase activity;phosphoric ester hydrolase activity;protein serine/threonine phosphatase activity	cell part;cytoplasmic part;intracellular membrane-bounded organelle;intracellular organelle;intracellular organelle lumen;intracellular organelle part;intracellular part;membrane-bounded organelle;membrane-enclosed lumen;mitochondrial matrix;mitochondrial part;mitochondrion;organelle;organelle lumen;organelle part		Acetylation;Calcium;Completeproteome;Hydrolase;Magnesium;Metal-binding;Mitochondrion;Proteinphosphatase;Referenceproteome;Transitpeptide
A2AJY2;O35206;A2AJY7;A2AJY5	A2AJY2;O35206;A2AJY7;A2AJY5	Collagen alpha-1(XV) chain;Restin	Col15a1	24.7119	24.963	24.5053	25.0902	25.4545	24.4502	24.6339	24.4125	25.2434	24.8369		0.409436	0.374151	-0.184673	5	5	5	3.9	3.9	3.9	138.29	0	5.6687	1736200000	28	biological adhesion;cell adhesion;cellular process	structural molecule activity	basement membrane;collagen;extracellular matrix part;extracellular region part;extracellular space	Protein digestion and absorption	3D-structure;Celladhesion;Collagen;Completeproteome;Disulfidebond;Extracellularmatrix;Glycoprotein;Hydroxylation;Referenceproteome;Repeat;Secreted;Signal
Q61234;A2AKD7	Q61234;A2AKD7	Alpha-1-syntrophin	Snta1	26.7632	26.5707	26.6927	26.9766	26.4922	26.4518	26.6197	26.6833	26.9608	26.843		0.618317	0.331516	-0.139762	4	4	4	11.9	11.9	11.9	53.664	0	15.317	2210300000	56	biological regulation;cellular component organization;cellular component organization or biogenesis;neuromuscular junction development;regulation of biological process;regulation of multicellular organismal process;regulation of system process;regulation of vasoconstriction;regulation of vasoconstriction by circulating norepinephrine;regulation of vasoconstriction by norepinephrine;synapse organi…	binding;lipid binding;phospholipid binding	cell junction;cell part;cytoplasm;cytoskeleton;intracellular;intracellular non-membrane-bounded organelle;intracellular organelle;intracellular part;macromolecular complex;membrane;non-membrane-bounded organelle;organelle;plasma membrane;postsynaptic membrane;protein complex;sarcolemma;synapse part;synaptic membrane		3D-structure;Actin-binding;Calcium;Calmodulin-binding;Celljunction;Cellmembrane;Completeproteome;Cytoplasm;Cytoskeleton;Directproteinsequencing;Membrane;Phosphoprotein;Referenceproteome;Repeat
A2AKG8;E9PYJ6;A2AKG8-3	A2AKG8;E9PYJ6	Focadhesin	Focad	NaN	NaN	NaN	NaN	NaN	NaN	NaN	NaN	NaN	NaN		-4.34294e-08	1	0	8	8	8	5.1	5.1	5.1	198.95	0	8.6437	542200000	15			adherens junction;anchoring junction;cell junction;cell part;cell-substrate adherens junction;cell-substrate junction;focal adhesion;integral to membrane;intrinsic to membrane;membrane part		Acetylation;Alternativesplicing;Celljunction;Completeproteome;Membrane;Referenceproteome;Transmembrane;Transmembranehelix
Q9D1G5;A2AKH7;Q8JZX5;B0R031	Q9D1G5;A2AKH7;Q8JZX5	Leucine-rich repeat-containing protein 57	Lrrc57	25.3375	25.4403	25.491	25.6775	NaN	25.322	25.4503	25.4097	25.5469	25.1662		0.181145	0.771121	-0.0368029	4	4	4	18.4	18.4	18.4	26.76	0	4.9464	1431000000	32					Completeproteome;Leucine-richrepeat;Referenceproteome;Repeat
P43406;A2AKI5;F6W6Q6	P43406;A2AKI5	Integrin alpha-V;Integrin alpha-V heavy chain;Integrin alpha-V light chain	Itgav	27.8232	27.622	27.6879	27.6298	27.8212	27.9229	28.1184	27.9846	28.0282	28.1315	+	1.21519	0.0831777	0.30959	16	16	16	18.6	18.6	18.6	115.36	0	137.55	12334000000	116	anatomical structure development;anatomical structure formation involved in morphogenesis;anatomical structure morphogenesis;angiogenesis;apoptotic cell clearance;biological adhesion;biological regulation;blood vessel development;calcium ion homeostasis;calcium ion transport;calcium ion transport into cytosol;cation homeostasis;cation transport;cell activation;cell adhesion;cell differentiation;c…	binding;calcium channel activity;cation binding;cation channel activity;cation transmembrane transporter activity;channel activity;cytokine binding;gated channel activity;growth factor binding;ion binding;ion channel activity;ion transmembrane transporter activity;metal ion binding;passive transmembrane transporter activity;protein binding;protein dimerization activity;protein heterodimerization …	alphav-beta3 integrin complex;alphav-beta3 integrin-IGF-1-IGF1R complex;cell part;external side of plasma membrane;integral to membrane;integrin complex;intracellular membrane-bounded organelle;intracellular organelle;intracellular part;intrinsic to membrane;macromolecular complex;membrane part;membrane-bounded organelle;nucleus;organelle;plasma membrane part;protein complex;receptor complex	Arrhythmogenic right ventricular cardiomyopathy (ARVC);Cell adhesion molecules (CAMs);Dilated cardiomyopathy;ECM-receptor interaction;Focal adhesion;Hypertrophic cardiomyopathy (HCM);Pathways in cancer;Phagosome;Regulation of actin cytoskeleton;Small cell lung cancer	Angiogenesis;Calcium;Celladhesion;Cleavageonpairofbasicresidues;Completeproteome;Developmentalprotein;Differentiation;Disulfidebond;Glycoprotein;Integrin;Membrane;Metal-binding;Receptor;Referenceproteome;Repeat;Signal;Transmembrane;Transmembranehelix
A2AKU9;A2AKV1;A2AKV2;A2AKV3;A2AKV0	A2AKU9;A2AKV1;A2AKV2;A2AKV3	ATP synthase subunit gamma	Atp5c1	31.2226	31.1338	31.4552	31.0266	31.1746	31.3928	31.5612	31.2757	31.4287	31.64		0.631974	0.245162	0.206475	9	9	1	32	32	4	32.77	0	147.35	67537000000	213	ATP biosynthetic process;ATP metabolic process;ATP synthesis coupled proton transport;biosynthetic process;cation transport;cellular biosynthetic process;cellular metabolic process;cellular nitrogen compound biosynthetic process;cellular nitrogen compound metabolic process;cellular process;energy coupled proton transport, down electrochemical gradient;establishment of localization;heterocycle bio…	active transmembrane transporter activity;ATPase activity;ATPase activity, coupled;ATPase activity, coupled to movement of substances;ATPase activity, coupled to transmembrane movement of ions;ATPase activity, coupled to transmembrane movement of substances;catalytic activity;cation transmembrane transporter activity;cation-transporting ATPase activity;hydrogen ion transmembrane transporter activ…	cell part;cytoplasmic part;intracellular organelle part;intracellular part;macromolecular complex;membrane;membrane part;mitochondrial inner membrane;mitochondrial membrane;mitochondrial membrane part;mitochondrial part;mitochondrial proton-transporting ATP synthase complex;organelle inner membrane;organelle membrane;organelle part;protein complex;proton-transporting ATP synthase complex;proton-t…		ATPsynthesis;CF(1);Completeproteome;Hydrogeniontransport;Iontransport;Referenceproteome;Transport
Q8BG05;A2AL12;A2AL13;V9GX38	Q8BG05;A2AL12	Heterogeneous nuclear ribonucleoprotein A3	Hnrnpa3	NaN	NaN	NaN	NaN	NaN	NaN	NaN	24.0736	NaN	NaN		-4.34294e-08	1	0	13	1	1	36.1	4.2	4.2	39.652	0	2.6702	227040000	1	cellular macromolecule metabolic process;cellular metabolic process;cellular nitrogen compound metabolic process;cellular process;macromolecule metabolic process;metabolic process;mRNA metabolic process;mRNA processing;nitrogen compound metabolic process;nucleic acid metabolic process;nucleobase-containing compound metabolic process;primary metabolic process;RNA metabolic process;RNA processing;R…	binding;nucleic acid binding;nucleotide binding;RNA binding	catalytic step 2 spliceosome;cell part;intracellular non-membrane-bounded organelle;intracellular organelle;intracellular organelle part;intracellular part;macromolecular complex;non-membrane-bounded organelle;nuclear part;nucleolus;organelle;organelle part;ribonucleoprotein complex;spliceosomal complex	Spliceosome	Acetylation;Alternativesplicing;Completeproteome;Directproteinsequencing;Methylation;mRNAprocessing;mRNAsplicing;Nucleus;Phosphoprotein;Referenceproteome;Repeat;Ribonucleoprotein;RNA-binding;Spliceosome
Q8C0I1;A2AL50;H3BKN2;A2AL49;H3BIY5	Q8C0I1;A2AL50;H3BKN2;A2AL49	Alkyldihydroxyacetonephosphate synthase, peroxisomal	Agps	24.8754	NaN	NaN	NaN	NaN	24.8105	25.4139	25.0134	NaN	24.9195		0	0.959324	0.236869	8	8	8	18	18	18	71.683	0	32.993	1161100000	13	biosynthetic process;cellular biosynthetic process;cellular lipid metabolic process;cellular metabolic process;cellular process;ether lipid biosynthetic process;ether lipid metabolic process;glycerol ether biosynthetic process;glycerol ether metabolic process;glycerolipid biosynthetic process;glycerolipid metabolic process;lipid biosynthetic process;lipid metabolic process;metabolic process;organ…	alkylglycerone-phosphate synthase activity;binding;catalytic activity;coenzyme binding;cofactor binding;FAD binding;flavin adenine dinucleotide binding;oxidoreductase activity;oxidoreductase activity, acting on CH-OH group of donors;oxidoreductase activity, acting on the CH-OH group of donors, NAD or NADP as acceptor;transferase activity;transferase activity, transferring alkyl or aryl (other tha…	cell part;cytoplasmic part;intracellular membrane-bounded organelle;intracellular organelle;intracellular organelle part;intracellular part;membrane;membrane-bounded organelle;microbody;microbody membrane;microbody part;mitochondrion;organelle;organelle membrane;organelle part;peroxisomal membrane;peroxisomal part	Ether lipid metabolism;Peroxisome	Acetylation;Completeproteome;FAD;Flavoprotein;Lipidbiosynthesis;Lipidmetabolism;Peroxisome;Phosphoprotein;Referenceproteome;Transferase;Transitpeptide
Q8BSY0;Q8CBM2;A2AL85	Q8BSY0;Q8CBM2;A2AL85	Aspartyl/asparaginyl beta-hydroxylase	Asph	30.3024	30.347	30.2341	30.2295	30.0407	30.3357	30.4958	30.302	30.1295	30.4889		0.70722	0.340008	0.121249	20	20	20	32.3	32.3	32.3	83.041	0	323.31	59556000000	347	activation of store-operated calcium channel activity;anatomical structure development;anatomical structure morphogenesis;appendage morphogenesis;biological regulation;calcium ion transmembrane transport;calcium ion transport;cation transport;cellular macromolecule metabolic process;cellular metabolic process;cellular process;cellular protein metabolic process;cellular response to calcium ion;cel…	catalytic activity;dioxygenase activity;oxidoreductase activity;oxidoreductase activity, acting on paired donors, with incorporation or reduction of molecular oxygen;oxidoreductase activity, acting on paired donors, with incorporation or reduction of molecular oxygen, 2-oxoglutarate as one donor, and incorporation of one atom each of oxygen into both donors;oxidoreductase activity, acting on sing…	cell cortex part;cell part;cortical endoplasmic reticulum;cytoplasm;cytoplasmic part;endoplasmic reticulum membrane;endoplasmic reticulum part;integral to membrane;intracellular organelle part;intracellular part;intrinsic to membrane;membrane;membrane part;organelle membrane;organelle part;plasma membrane		Completeproteome;Dioxygenase;Endoplasmicreticulum;Glycoprotein;Iron;Membrane;Oxidoreductase;Referenceproteome;Repeat;Signal-anchor;TPRrepeat;Transmembrane;Transmembranehelix
Q6NZB0;A2ALF0;A2ALF3;F6TQL3;F7CXJ2;F6QIL6	Q6NZB0;A2ALF0;A2ALF3;F6TQL3	DnaJ homolog subfamily C member 8	Dnajc8	26.9633	27.5249	26.9909	27.3661	27.3503	27.4189	27.309	26.6833	27.2454	26.5374		0.340773	0.410014	0.204301	7	7	7	24.1	24.1	24.1	29.812	0	6.9555	4480200000	27					Acetylation;Chaperone;Completeproteome;Phosphoprotein;Referenceproteome
A2ALW5;A2ALW5-2;Z4YLX5;F2Z410;F2Z3Z8	A2ALW5;A2ALW5-2	DnaJ homolog subfamily C member 25	Dnajc25	NaN	26.0041	NaN	25.8268	NaN	25.6782	26.0447	25.8849	25.7904	25.6898		0	0.958897	-0.142671	5	5	4	19	19	10.6	41.937	0	5.7496	2820000000	12			cell part;integral to membrane;intrinsic to membrane;membrane part		Alternativesplicing;Chaperone;Completeproteome;Membrane;Referenceproteome;Transmembrane;Transmembranehelix
A2AMC3;Q3UXG7;Q91ZW2;E9PZ15;E9Q686	A2AMC3;Q3UXG7;Q91ZW2;E9PZ15;E9Q686	GDP-fucose protein O-fucosyltransferase 1	Pofut1	25.7377	26.175	25.6758	NaN	25.8722	26.2859	26.334	26.396	26.2613	25.9885	+	0.93704	0.0894902	0.447148	6	6	6	20.7	20.7	20.7	40.02	0	28.393	5092800000	100	alcohol metabolic process;anatomical structure development;anatomical structure formation involved in morphogenesis;angiogenesis;anterior/posterior pattern specification;biological regulation;carbohydrate metabolic process;cell surface receptor linked signaling pathway;cellular carbohydrate metabolic process;cellular macromolecule metabolic process;cellular metabolic process;cellular process;cell…	catalytic activity;fucosyltransferase activity;peptide-O-fucosyltransferase activity;transferase activity;transferase activity, transferring glycosyl groups;transferase activity, transferring hexosyl groups	cell part;cytoplasmic part;endoplasmic reticulum;intracellular membrane-bounded organelle;intracellular organelle;intracellular part;membrane;membrane-bounded organelle;organelle	Other types of O-glycan biosynthesis	Carbohydratemetabolism;Completeproteome;Disulfidebond;Endoplasmicreticulum;Fucosemetabolism;Glycoprotein;Glycosyltransferase;Manganese;Notchsignalingpathway;Referenceproteome;Signal;Transferase
A2AMH5;A2AMH4;Q6X893;Q6X893-2;A2AMH3;A2AMH8	A2AMH5;A2AMH4;Q6X893;Q6X893-2;A2AMH3;A2AMH8	Choline transporter-like protein 1	Slc44a1	29.3565	29.5577	29.5611	30.1636	30.0314	28.9056	28.7721	29.723	29.7698	29.3104	+	2.13032	0.0131862	-0.652921	8	8	8	15.7	15.7	15.7	73.044	0	67.903	16804000000	98		active transmembrane transporter activity;amine transmembrane transporter activity;choline transmembrane transporter activity;substrate-specific transmembrane transporter activity;substrate-specific transporter activity;transmembrane transporter activity;transporter activity	cell part;cytoplasmic part;integral to membrane;intracellular organelle part;intracellular part;intrinsic to membrane;membrane;membrane part;mitochondrial membrane;mitochondrial outer membrane;mitochondrial part;organelle membrane;organelle outer membrane;organelle part;outer membrane;plasma membrane		Alternativesplicing;Cellmembrane;Completeproteome;Lipoprotein;Membrane;Mitochondrion;Mitochondrionoutermembrane;Myristate;Referenceproteome;Transmembrane;Transmembranehelix;Transport
Q80XI3;Z4YKC4;A2AMI2;Q80XI3-2;Q80XI3-4;Q80XI3-3;A2AMI7;A2AMI6	Q80XI3;Z4YKC4;A2AMI2;Q80XI3-2;Q80XI3-4;Q80XI3-3;A2AMI7	Eukaryotic translation initiation factor 4 gamma 3	Eif4g3	25.4142	25.5284	25.6378	25.3159	NaN	26.0124	26.051	25.8468	25.3952	25.8176	+	2.02696	0.0144496	0.504924	13	11	11	9.4	8.4	8.4	174.89	0	21.595	2919300000	47	biological regulation;cellular macromolecule metabolic process;cellular metabolic process;cellular nitrogen compound metabolic process;cellular process;gamete generation;macromolecule metabolic process;male gamete generation;metabolic process;multicellular organismal process;multicellular organismal reproductive process;nitrogen compound metabolic process;nucleic acid metabolic process;nucleobase…	binding;DNA binding;nucleic acid binding;RNA binding;translation factor activity, nucleic acid binding;translation initiation factor activity		RNA transport;Viral myocarditis	Alternativesplicing;Coiledcoil;Completeproteome;Initiationfactor;Phosphoprotein;Proteinbiosynthesis;Referenceproteome;Repeat;RNA-binding;Translationregulation
A2AMM0	A2AMM0	Muscle-related coiled-coil protein	Murc	NaN	NaN	NaN	NaN	NaN	NaN	NaN	NaN	NaN	NaN		-4.34294e-08	1	0	2	2	2	7.5	7.5	7.5	41.008	0	4.2592	649740000	11	actin cytoskeleton organization;actin filament-based process;actomyosin structure organization;anatomical structure development;anatomical structure formation involved in morphogenesis;biological regulation;biosynthetic process;cardiac myofibril assembly;cellular biosynthetic process;cellular component assembly;cellular component assembly at cellular level;cellular component assembly involved in …	enzyme activator activity;enzyme regulator activity;GTPase activator activity;GTPase regulator activity;nucleoside-triphosphatase regulator activity;Ras GTPase activator activity;Rho GTPase activator activity;small GTPase regulator activity	cell part;contractile fiber part;cytoplasmic part;intracellular part;organelle part;Z disc		Activator;Coiledcoil;Completeproteome;Cytoplasm;Developmentalprotein;Differentiation;Myogenesis;Referenceproteome;Transcription;Transcriptionregulation
Q99L43;A2AMQ5;F6S4G2;Q6PBC0	Q99L43;A2AMQ5;F6S4G2	Phosphatidate cytidylyltransferase 2;Phosphatidate cytidylyltransferase	Cds2	29.6967	29.5382	29.3897	29.5607	29.3067	28.9594	29.1534	28.9904	29.0377	29.3702	+	1.42956	0.0325854	-0.485134	5	5	5	17.8	17.8	17.8	51.313	0	112.85	11243000000	104	acylglycerol biosynthetic process;acylglycerol metabolic process;biological regulation;biosynthetic process;carbohydrate metabolic process;CDP-diacylglycerol biosynthetic process;CDP-diacylglycerol metabolic process;cellular biosynthetic process;cellular lipid metabolic process;cellular metabolic process;cellular process;cellular response to stimulus;detection of abiotic stimulus;detection of ext…	catalytic activity;cytidylyltransferase activity;nucleotidyltransferase activity;phosphatidate cytidylyltransferase activity;transferase activity;transferase activity, transferring phosphorus-containing groups	cell part;cytoplasmic part;endoplasmic reticulum;integral to membrane;intracellular membrane-bounded organelle;intracellular organelle;intracellular organelle part;intracellular part;intrinsic to membrane;membrane;membrane part;membrane-bounded organelle;mitochondrial inner membrane;mitochondrial membrane;mitochondrial part;organelle;organelle inner membrane;organelle membrane;organelle part	Glycerophospholipid metabolism;Phosphatidylinositol signaling system	Completeproteome;Lipidbiosynthesis;Lipidmetabolism;Membrane;Mitochondrion;Mitochondrioninnermembrane;Nucleotidyltransferase;Phospholipidbiosynthesis;Phospholipidmetabolism;Phosphoprotein;Referenceproteome;Transferase;Transmembrane;Transmembranehelix
Q9D0I8;A2AMV1;D6RCI7	Q9D0I8;A2AMV1	mRNA turnover protein 4 homolog	Mrto4	25.9595	25.7993	25.9032	NaN	NaN	26.891	25.9999	26.011	26.0912	25.8688		0.705945	0.118052	0.558119	4	4	4	18	18	18	27.545	0	4.5151	2406700000	18	cellular component biogenesis;cellular component biogenesis at cellular level;cellular component organization or biogenesis;cellular component organization or biogenesis at cellular level;cellular process;ribonucleoprotein complex biogenesis;ribosome biogenesis		cell part;cytoplasmic part;intracellular non-membrane-bounded organelle;intracellular organelle;intracellular organelle part;intracellular part;macromolecular complex;membrane;non-membrane-bounded organelle;nuclear membrane;nuclear part;nucleolus;organelle;organelle membrane;organelle part;ribonucleoprotein complex;ribosome		Completeproteome;Nucleus;Referenceproteome;Ribonucleoprotein;Ribosomalprotein;Ribosomebiogenesis
P47757-2;A2AMW0;P47757-4;F7CAZ6;A0A0A0MQI9	P47757-2;A2AMW0;P47757-4;F7CAZ6	F-actin-capping protein subunit beta	Capzb	29.6404	29.602	29.6053	29.621	29.5319	29.7918	30.0538	29.82	29.5165	29.566	+	1.27413	0.0801042	0.306856	15	15	2	57.4	57.4	5.9	30.628	0	323.31	39873000000	125	actin cytoskeleton organization;actin filament capping;actin filament-based process;anatomical structure development;barbed-end actin filament capping;biological regulation;cell development;cell projection assembly;cell projection organization;cellular component assembly;cellular component assembly at cellular level;cellular component organization;cellular component organization at cellular level…		cell cortex part;cell junction;cell part;cell projection;cell-cell contact zone;cell-cell junction;contractile fiber part;cortical cytoskeleton;cytoplasmic part;cytoskeletal calyx;cytoskeletal part;cytoskeleton;F-actin capping protein complex;intercalated disc;intracellular non-membrane-bounded organelle;intracellular organelle;intracellular organelle part;intracellular part;lamellipodium;macromo…		Acetylation;Actin-binding;Actincapping;Alternativesplicing;Completeproteome;Cytoplasm;Cytoskeleton;Directproteinsequencing;Phosphoprotein;Referenceproteome
A2AN08;A2AN08-5;A2AN08-3;A2AN08-2;Z4YMA7;F6SSP6;A2AN08-4	A2AN08;A2AN08-5;A2AN08-3;A2AN08-2	E3 ubiquitin-protein ligase UBR4	Ubr4	27.5505	27.2607	26.8957	27.4527	27.057	27.7403	27.8394	27.8318	27.3902	27.4663	+	0.955076	0.0769644	0.554193	23	23	23	5.3	5.3	5.3	572.28	0	54.273	6703800000	56	cellular macromolecule metabolic process;cellular metabolic process;cellular process;cellular protein metabolic process;macromolecule metabolic process;macromolecule modification;metabolic process;primary metabolic process;protein metabolic process;protein modification by small protein conjugation;protein modification by small protein conjugation or removal;protein modification process;protein ub…	acid-amino acid ligase activity;binding;catalytic activity;cation binding;ion binding;ligase activity;ligase activity, forming carbon-nitrogen bonds;metal ion binding;small conjugating protein ligase activity;transition metal ion binding;ubiquitin-protein ligase activity;zinc ion binding	cell part;cytoplasm;cytoskeleton;integral to membrane;intracellular membrane-bounded organelle;intracellular non-membrane-bounded organelle;intracellular organelle;intracellular part;intrinsic to membrane;membrane part;membrane-bounded organelle;non-membrane-bounded organelle;nucleus;organelle		Acetylation;Alternativesplicing;Calmodulin-binding;Completeproteome;Cytoplasm;Cytoskeleton;Ligase;Membrane;Metal-binding;Nucleus;Phosphoprotein;Referenceproteome;Transmembrane;Transmembranehelix;Ublconjugationpathway;Zinc;Zinc-finger
Q3UIU2;A2AP32	Q3UIU2;A2AP32	NADH dehydrogenase [ubiquinone] 1 beta subcomplex subunit 6	Ndufb6	29.3271	28.9538	29.135	28.9448	28.8109	28.3816	27.7706	29.2954	29.2723	29.3872	+	1.54751	0.0130357	-1.06249	4	4	4	36.7	36.7	36.7	15.515	0	4.8108	13360000000	27	cellular metabolic process;cellular process;electron transport chain;generation of precursor metabolites and energy;metabolic process;oxidation-reduction process		cell part;cytoplasmic part;integral to membrane;intracellular membrane-bounded organelle;intracellular organelle;intracellular organelle part;intracellular part;intrinsic to membrane;macromolecular complex;membrane part;membrane-bounded organelle;mitochondrial membrane part;mitochondrial part;mitochondrial respiratory chain complex I;mitochondrion;NADH dehydrogenase complex;nucleus;organelle;orga…	Alzheimer's disease;Huntington's disease;Oxidative phosphorylation;Parkinson's disease	Acetylation;Completeproteome;Electrontransport;Membrane;Mitochondrion;Mitochondrioninnermembrane;Referenceproteome;Respiratorychain;Transmembrane;Transmembranehelix;Transport
O54879;A2AP78	O54879;A2AP78	High mobility group protein B3	Hmgb3	26.7632	27.117	27.2456	27.0793	27.2208	27.589	27.1301	27.3408	27.3838	27.0274		0.525751	0.230415	0.317571	2	2	2	13	13	13	23.01	0	3.8484	2281800000	32	biological regulation;negative regulation of B cell activation;negative regulation of B cell differentiation;negative regulation of biological process;negative regulation of cell activation;negative regulation of cell differentiation;negative regulation of cellular process;negative regulation of developmental process;negative regulation of immune system process;negative regulation of leukocyte ac…	binding;DNA binding;nucleic acid binding	cell part;chromosome;intracellular membrane-bounded organelle;intracellular non-membrane-bounded organelle;intracellular organelle;intracellular part;membrane-bounded organelle;non-membrane-bounded organelle;nucleus;organelle		Chromosome;Completeproteome;DNA-binding;Nucleus;Referenceproteome;Repeat
Q9QY24;A2APF7;Q9QY24-2	Q9QY24;A2APF7;Q9QY24-2	Z-DNA-binding protein 1	Zbp1	NaN	NaN	NaN	NaN	NaN	NaN	NaN	NaN	NaN	NaN		-4.34294e-08	1	0	4	4	4	12.7	12.7	12.7	44.331	0	9.8291	422880000	8	biological regulation;defense response;defense response to virus;immune effector process;immune response;immune system process;innate immune response;interaction with host;interspecies interaction between organisms;multi-organism process;positive regulation of biological process;positive regulation of cell communication;positive regulation of cellular process;positive regulation of cytokine-media…	adenosine deaminase activity;binding;catalytic activity;deaminase activity;DNA binding;double-stranded RNA adenosine deaminase activity;hydrolase activity;hydrolase activity, acting on carbon-nitrogen (but not peptide) bonds;hydrolase activity, acting on carbon-nitrogen (but not peptide) bonds, in cyclic amidines;left-handed Z-DNA binding;nucleic acid binding;RNA binding;structure-specific DNA bi…	cell part;cytoplasm;cytoplasmic part;cytosol;intracellular membrane-bounded organelle;intracellular organelle;intracellular part;membrane-bounded organelle;nucleus;organelle	Cytosolic DNA-sensing pathway	3D-structure;Alternativesplicing;Antiviraldefense;Completeproteome;DNA-binding;Host-virusinteraction;Immunity;Innateimmunity;Referenceproteome;Repeat
P15379;P15379-2;Q3U8S1;A2APM5;A2APM3;A2APM4;E9QKM8;Q80X37;A2APM1;A2APM2;P15379-3;P15379-6;P15379-11;P15379-5;P15379-10;P15379-9;P15379-4;P15379-8;P15379-7	P15379;P15379-2;Q3U8S1;A2APM5;A2APM3;A2APM4;E9QKM8;Q80X37;A2APM1;A2APM2;P15379-3;P15379-6;P15379-11;P15379-5;P15379-10;P15379-9;P15379-4;P15379-8;P15379-7	CD44 antigen	Cd44	NaN	NaN	NaN	NaN	NaN	25.5505	NaN	NaN	NaN	NaN		0	0.95847	NaN	2	2	2	3.1	3.1	3.1	85.616	0	9.7592	1510700000	21	amine metabolic process;aminoglycan catabolic process;aminoglycan metabolic process;anatomical structure development;anatomical structure morphogenesis;biological adhesion;biological regulation;branching involved in prostate gland morphogenesis;branching involved in ureteric bud morphogenesis;branching morphogenesis of a tube;carbohydrate catabolic process;carbohydrate metabolic process;cartilage…	binding;carbohydrate binding;catalytic activity;glycosaminoglycan binding;hexosaminidase activity;hyaluronic acid binding;hyalurononglucosaminidase activity;hydrolase activity;hydrolase activity, acting on glycosyl bonds;hydrolase activity, hydrolyzing O-glycosyl compounds;molecular transducer activity;pattern binding;polysaccharide binding;receptor activity;signal transducer activity;signaling r…	basolateral plasma membrane;cell part;external side of plasma membrane;integral to membrane;intrinsic to membrane;membrane part;plasma membrane part	ECM-receptor interaction;Hematopoietic cell lineage;Shigellosis	3D-structure;Alternativesplicing;Celladhesion;Completeproteome;Disulfidebond;Glycoprotein;Membrane;Phosphoprotein;Proteoglycan;Receptor;Referenceproteome;Signal;Sulfation;Transmembrane;Transmembranehelix
A2APV2;E9PXE6;F8VPR2;A2APV2-2;A2APV2-3;F6XR20;A2AQW2;Q9JL26;Q9JL26-2;A2AB60	A2APV2;E9PXE6;F8VPR2;A2APV2-2;A2APV2-3	Formin-like protein 2	Fmnl2	28.626	28.2682	28.818	28.9405	28.9748	28.1715	28.2395	28.4575	28.5523	28.521		0.745671	0.137221	-0.365262	18	18	12	16.6	16.6	11.3	123.1	0	21.124	12682000000	133	actin cytoskeleton organization;actin filament severing;actin filament-based process;biological regulation;cell migration;cell motility;cellular component movement;cellular component organization;cellular component organization at cellular level;cellular component organization or biogenesis;cellular component organization or biogenesis at cellular level;cellular process;cortical actin cytoskeleto…	actin binding;actin filament binding;binding;cytoskeletal protein binding;enzyme binding;GTPase activating protein binding;GTPase binding;profilin binding;protein binding;Rac GTPase binding;Ras GTPase binding;Rho GTPase binding;small GTPase binding	cell part;cytoplasm;cytoplasmic membrane-bounded vesicle;cytoplasmic part;cytoplasmic vesicle;cytosol;endocytic vesicle;intracellular membrane-bounded organelle;intracellular organelle;intracellular part;membrane;membrane-bounded organelle;membrane-bounded vesicle;organelle;phagocytic vesicle;plasma membrane;vesicle		Alternativesplicing;Cellmembrane;Completeproteome;Cytoplasm;Cytoplasmicvesicle;Lipoprotein;Membrane;Myristate;Phosphoprotein;Referenceproteome
P21460;A2APX3	P21460;A2APX3	Cystatin-C	Cst3	NaN	NaN	NaN	NaN	NaN	NaN	NaN	NaN	NaN	NaN		-4.34294e-08	1	0	1	1	1	7.9	7.9	7.9	15.531	0.00052288	2.2148	319030000	7	anatomical structure development;apoptosis;behavior;biological regulation;brain development;cell activation;cell death;cell development;cellular component organization;cellular component organization at cellular level;cellular component organization or biogenesis;cellular component organization or biogenesis at cellular level;cellular developmental process;cellular process;cellular process involv…	beta-amyloid binding;binding;cysteine-type endopeptidase inhibitor activity;endopeptidase inhibitor activity;endopeptidase regulator activity;enzyme inhibitor activity;enzyme regulator activity;peptidase inhibitor activity;peptidase regulator activity;protein binding	basement membrane;cell body;cell part;cell projection;contractile fiber;cytoplasmic part;endoplasmic reticulum;endosome;extracellular matrix part;extracellular region part;extracellular space;intracellular membrane-bounded organelle;intracellular non-membrane-bounded organelle;intracellular organelle;intracellular organelle part;intracellular part;late endosome;lysosome;lytic vacuole;membrane;mem…	Salivary secretion	Completeproteome;Disulfidebond;Proteaseinhibitor;Referenceproteome;Secreted;Signal;Thiolproteaseinhibitor
Q80TY0;Q80TY0-4;Q80TY0-3;A2AQ43;A2AQ44;A2AQ42;A2AQ45;A2AQ41;Q80TY0-2;A0A0A6YWT1;Q80TY0-5;A2AQ47;F6VVN1	Q80TY0;Q80TY0-4;Q80TY0-3;A2AQ43;A2AQ44;A2AQ42;A2AQ45;A2AQ41;Q80TY0-2;A0A0A6YWT1;Q80TY0-5	Formin-binding protein 1	Fnbp1	NaN	NaN	NaN	NaN	NaN	NaN	NaN	NaN	NaN	NaN		-4.34294e-08	1	0	3	3	3	4.9	4.9	4.9	71.343	0	3.3849	944120000	7	cellular component organization;cellular component organization or biogenesis;cellular membrane organization;cellular process;endocytosis;establishment of localization;membrane invagination;membrane organization;transport;vesicle-mediated transport	binding;lipid binding	cell cortex;cell part;coated pit;cytoplasmic membrane-bounded vesicle;cytoplasmic part;cytoplasmic vesicle;cytoskeleton;intracellular membrane-bounded organelle;intracellular non-membrane-bounded organelle;intracellular organelle;intracellular part;lysosome;lytic vacuole;membrane;membrane part;membrane-bounded organelle;membrane-bounded vesicle;non-membrane-bounded organelle;organelle;plasma memb…		Acetylation;Alternativesplicing;Cellmembrane;Coatedpit;Coiledcoil;Completeproteome;Cytoplasm;Cytoplasmicvesicle;Cytoskeleton;Endocytosis;Lipid-binding;Lysosome;Membrane;Phosphoprotein;Referenceproteome;SH3domain
A2AQ53;Q61554	A2AQ53;Q61554	Fibrillin-1	Fbn1	26.2194	NaN	NaN	26.0474	NaN	25.9512	26.0892	25.862	26.4256	26.1495		0	0.958044	-0.199216	9	9	9	3.3	3.3	3.3	312.3	0	10.306	4768800000	37	anatomical structure development;biological regulation;cellular process;developmental process;extracellular sequestering of receptor ligand;heart development;maintenance of location;maintenance of location in cell;maintenance of protein localization to organelle;maintenance of protein location;maintenance of protein location in cell;maintenance of protein location in extracellular region;negative…	binding;calcium ion binding;cation binding;extracellular matrix structural constituent;ion binding;metal ion binding;structural molecule activity	basement membrane;extracellular matrix part;extracellular region part;extracellular space;fibril;microfibril		Calcium;Completeproteome;Disulfidebond;EGF-likedomain;Extracellularmatrix;Glycoprotein;Phosphoprotein;Referenceproteome;Repeat;Secreted;Signal
A2AQ92;A2AQ99	A2AQ92		Duox1	NaN	NaN	NaN	NaN	NaN	NaN	NaN	NaN	NaN	NaN		-4.34294e-08	1	0	4	4	4	4	4	4	177.13	0	4.0571	373600000	4	adenohypophysis morphogenesis;alcohol metabolic process;amine metabolic process;anatomical structure development;anatomical structure morphogenesis;benzene-containing compound metabolic process;biological regulation;biomineral tissue development;bone mineralization;carboxylic acid metabolic process;cell surface receptor linked signaling pathway;cellular amine metabolic process;cellular amino acid…	antioxidant activity;binding;calcium ion binding;catalytic activity;cation binding;heme binding;ion binding;iron ion binding;metal ion binding;NAD(P)H oxidase activity;oxidoreductase activity;oxidoreductase activity, acting on NADH or NADPH;oxidoreductase activity, acting on NADH or NADPH, oxygen as acceptor;oxidoreductase activity, acting on peroxide as acceptor;peroxidase activity;tetrapyrrole …	cell part;integral to membrane;intrinsic to membrane;membrane;membrane part;plasma membrane		Completeproteome;Membrane;Oxidoreductase;Referenceproteome;Transmembrane;Transmembranehelix
Q8CFQ3;A2AQA7	Q8CFQ3;A2AQA7	Intron-binding protein aquarius	Aqr	NaN	NaN	NaN	NaN	NaN	25.6623	NaN	NaN	NaN	NaN		0	0.957619	NaN	4	4	4	3.5	3.5	3.5	170.29	0	3.1157	735200000	10	cellular macromolecule metabolic process;cellular metabolic process;cellular nitrogen compound metabolic process;cellular process;macromolecule metabolic process;metabolic process;mRNA metabolic process;mRNA processing;nitrogen compound metabolic process;nuclear mRNA splicing, via spliceosome;nucleic acid metabolic process;nucleobase-containing compound metabolic process;primary metabolic process…		catalytic step 2 spliceosome;cell part;intracellular organelle part;intracellular part;macromolecular complex;nuclear part;organelle part;ribonucleoprotein complex;spliceosomal complex	Spliceosome	Acetylation;Completeproteome;mRNAprocessing;mRNAsplicing;Nucleus;Referenceproteome;RNA-binding;Spliceosome
A2AQB2;G3UWS1;F6X9B6;F6RM14	A2AQB2		Neb	NaN	NaN	NaN	NaN	NaN	NaN	NaN	NaN	NaN	25.2182		-4.34294e-08	1	0	25	3	3	8.5	1	1	353.16	0	3.7537	1793600000	14	actin cytoskeleton organization;actin filament-based process;actomyosin structure organization;biological regulation;cellular component organization;cellular component organization at cellular level;cellular component organization or biogenesis;cellular component organization or biogenesis at cellular level;cellular process;cytoskeleton organization;organelle organization;regulation of actin cyto…		cell part;contractile fiber part;cytoplasmic part;cytoskeletal part;intracellular organelle part;intracellular part;macromolecular complex;organelle part;protein complex;striated muscle thin filament;Z disc		Completeproteome;Referenceproteome;SH3domain
P61202;A2AQE4;P61202-2	P61202;A2AQE4;P61202-2	COP9 signalosome complex subunit 2	Cops2	27.9819	27.7991	27.5975	27.7233	27.3771	27.6834	27.5714	27.6092	27.556	27.4176		0.457831	0.362633	-0.16545	9	9	9	21.9	21.9	21.9	51.596	0	115.62	8949700000	93	biological regulation;cell differentiation;cell proliferation;cellular developmental process;cellular macromolecule metabolic process;cellular metabolic process;cellular process;cellular protein metabolic process;cullin deneddylation;developmental process;macromolecule metabolic process;macromolecule modification;metabolic process;muscle cell differentiation;negative regulation of biological proc…	protein binding transcription factor activity;transcription cofactor activity;transcription corepressor activity;transcription factor binding transcription factor activity	cell part;cytoplasm;intracellular organelle part;intracellular part;macromolecular complex;nuclear part;organelle part;protein complex;signalosome		Alternativesplicing;Completeproteome;Cytoplasm;Nucleus;Phosphoprotein;Referenceproteome;Signalosome
Q8BXN9;A2AQJ7;A2AQJ5;A2AQJ6;Q8BXN9-3;Q8BXN9-2	Q8BXN9;A2AQJ7;A2AQJ5;A2AQJ6;Q8BXN9-3;Q8BXN9-2	Transmembrane protein 87A	Tmem87a	NaN	NaN	NaN	NaN	22.6566	NaN	NaN	NaN	NaN	NaN		-4.34294e-08	1	0	1	1	1	2.2	2.2	2.2	63.379	0.00026582	2.3567	122370000	4			cell part;integral to membrane;intrinsic to membrane;membrane part		Alternativesplicing;Completeproteome;Glycoprotein;Membrane;Phosphoprotein;Referenceproteome;Signal;Transmembrane;Transmembranehelix
Q8BVW0;A2AQJ8;Q8BVW0-2	Q8BVW0;A2AQJ8;Q8BVW0-2	Neutral alpha-glucosidase C	Ganc	NaN	NaN	NaN	NaN	NaN	NaN	NaN	NaN	NaN	NaN		-4.34294e-08	1	0	1	1	1	1.3	1.3	1.3	102.01	0.0033573	1.4946	124420000	2	alcohol metabolic process;carbohydrate metabolic process;cellular carbohydrate metabolic process;cellular metabolic process;cellular process;glucose metabolic process;hexose metabolic process;metabolic process;monosaccharide metabolic process;primary metabolic process;small molecule metabolic process	alpha-glucosidase activity;binding;carbohydrate binding;catalytic activity;glucosidase activity;hydrolase activity;hydrolase activity, acting on glycosyl bonds;hydrolase activity, hydrolyzing O-glycosyl compounds		Galactose metabolism;Starch and sucrose metabolism	Alternativesplicing;Completeproteome;Glycosidase;Hydrolase;Referenceproteome
Q9QXG4;A2AQN4;A2AQN5;F7CU63	Q9QXG4;A2AQN4;A2AQN5;F7CU63	Acetyl-coenzyme A synthetase, cytoplasmic	Acss2	NaN	NaN	NaN	NaN	NaN	NaN	NaN	NaN	NaN	NaN		-4.34294e-08	1	0	2	2	2	3.9	3.9	3.9	78.861	0	5.9575	402180000	8	acetate biosynthetic process;acetate metabolic process;acetyl-CoA biosynthetic process;acetyl-CoA metabolic process;biosynthetic process;carboxylic acid biosynthetic process;carboxylic acid metabolic process;cellular biosynthetic process;cellular ketone metabolic process;cellular metabolic process;cellular process;coenzyme biosynthetic process;coenzyme metabolic process;cofactor biosynthetic proc…	acetate-CoA ligase activity;acid-thiol ligase activity;adenyl nucleotide binding;adenyl ribonucleotide binding;ATP binding;binding;catalytic activity;CoA-ligase activity;ligase activity;ligase activity, forming carbon-sulfur bonds;nucleotide binding;purine nucleotide binding;purine ribonucleoside triphosphate binding;purine ribonucleotide binding;ribonucleotide binding	cell part;cytoplasm;intracellular membrane-bounded organelle;intracellular organelle;intracellular part;membrane-bounded organelle;nucleus;organelle	Carbon fixation pathways in prokaryotes;Glycolysis / Gluconeogenesis;Methane metabolism;Propanoate metabolism;Pyruvate metabolism	Acetylation;ATP-binding;Completeproteome;Cytoplasm;Ligase;Nucleotide-binding;Phosphoprotein;Referenceproteome
A2AQV2;Q80V53	A2AQV2;Q80V53	Carbohydrate sulfotransferase 14	Chst14	NaN	NaN	NaN	NaN	NaN	NaN	NaN	NaN	NaN	NaN		-4.34294e-08	1	0	3	3	3	9.1	9.1	9.1	40.068	0	5.5742	280060000	6	biosynthetic process;carbohydrate biosynthetic process;carbohydrate metabolic process;cellular macromolecule metabolic process;cellular metabolic process;cellular process;chondroitin sulfate proteoglycan metabolic process;dermatan sulfate proteoglycan metabolic process;glycoprotein metabolic process;macromolecule metabolic process;metabolic process;primary metabolic process;proteoglycan metabolic…	catalytic activity;N-acetylgalactosamine 4-O-sulfotransferase activity;sulfotransferase activity;transferase activity;transferase activity, transferring sulfur-containing groups	cell part;cytoplasmic part;Golgi apparatus part;Golgi membrane;integral to membrane;intracellular organelle part;intracellular part;intrinsic to membrane;membrane;membrane part;organelle membrane;organelle part	Glycosaminoglycan biosynthesis - chondroitin sulfate	Carbohydratemetabolism;Completeproteome;Glycoprotein;Golgiapparatus;Membrane;Referenceproteome;Signal-anchor;Transferase;Transmembrane;Transmembranehelix
A2ARA8;G3UYV5;G3UYN5;A2ARA8-2	A2ARA8	Integrin alpha-8;Integrin alpha-8 heavy chain;Integrin alpha-8 light chain	Itga8	29.0811	29.0338	28.8167	28.5785	28.7895	28.1965	28.6369	28.657	28.4359	28.5739	+	1.19565	0.0420894	-0.560511	7	7	7	7.3	7.3	7.3	117.55	0	9.2237	9233000000	76	anatomical structure development;anatomical structure morphogenesis;behavior;biological adhesion;biological regulation;cell adhesion;cell projection organization;cell surface receptor linked signaling pathway;cellular component organization;cellular component organization at cellular level;cellular component organization or biogenesis;cellular component organization or biogenesis at cellular leve…	binding;cation binding;ion binding;metal ion binding	apical part of cell;cell part;integrin complex;macromolecular complex;membrane part;plasma membrane part;protein complex;receptor complex	Arrhythmogenic right ventricular cardiomyopathy (ARVC);Cell adhesion molecules (CAMs);Dilated cardiomyopathy;ECM-receptor interaction;Focal adhesion;Hypertrophic cardiomyopathy (HCM);Regulation of actin cytoskeleton	Alternativesplicing;Calcium;Celladhesion;Cleavageonpairofbasicresidues;Completeproteome;Developmentalprotein;Differentiation;Disulfidebond;Glycoprotein;Integrin;Membrane;Metal-binding;Neurogenesis;Receptor;Referenceproteome;Repeat;Signal;Transmembrane;Transmembranehelix
Q9QYR6;A2ARP8;Q9QYR6-2	Q9QYR6;A2ARP8;Q9QYR6-2	Microtubule-associated protein 1A;MAP1A heavy chain;MAP1 light chain LC2	Map1a	26.8065	26.6633	26.5336	26.5583	NaN	27.0884	26.6248	27.0274	26.132	26.7827		0.381042	0.390964	0.188802	20	19	19	9.3	8.9	8.9	300.14	0	63.333	5628400000	85	cellular component organization;cellular component organization at cellular level;cellular component organization or biogenesis;cellular component organization or biogenesis at cellular level;cellular process;cytoskeleton organization;microtubule cytoskeleton organization;microtubule-based process;multicellular organismal process;neurological system process;organelle organization;sensory percepti…	binding;catalytic activity;cytoskeletal protein binding;hydrolase activity;microtubule binding;protein binding;tubulin binding	cell part;cytoplasmic part;cytoskeletal part;cytosol;intracellular organelle part;intracellular part;macromolecular complex;microtubule;organelle part;protein complex		Alternativesplicing;Completeproteome;Cytoplasm;Cytoskeleton;Microtubule;Phosphoprotein;Referenceproteome;Repeat
P28660;A2AS98;P28660-2;Q8K1X4	P28660;A2AS98;P28660-2	Nck-associated protein 1	Nckap1	28.1539	27.9929	27.8502	27.9486	28.0533	28.0012	28.019	28.038	27.977	27.9361		0.0322953	0.935631	0.0110846	14	14	14	13.8	13.8	13.8	128.78	0	56.338	8777100000	133	actin cytoskeleton organization;actin filament-based process;actin polymerization-dependent cell motility;activation of immune response;ameboidal cell migration;anatomical structure development;anatomical structure formation involved in morphogenesis;anatomical structure morphogenesis;anterior/posterior axis specification;anterior/posterior axis specification, embryo;anterior/posterior pattern sp…	binding;enzyme activator activity;enzyme regulator activity;GTPase activator activity;GTPase regulator activity;kinase activator activity;kinase regulator activity;nucleoside-triphosphatase regulator activity;protein binding;protein complex binding;protein kinase activator activity;protein kinase regulator activity;Rac GTPase activator activity;Ras GTPase activator activity;Rho GTPase activator a…	cell part;cell projection;cell projection membrane;cell projection part;cytoplasm;cytoplasmic part;cytosol;integral to membrane;intracellular part;intrinsic to membrane;lamellipodium;lamellipodium membrane;leading edge membrane;macromolecular complex;membrane part;plasma membrane part;protein complex;SCAR complex	Regulation of actin cytoskeleton	Acetylation;Alternativesplicing;Cellmembrane;Cellprojection;Completeproteome;Cytoplasm;Membrane;Referenceproteome;Transmembrane;Transmembranehelix
A2ASS6;E9Q8N1;E9Q8K5;A2ASS6-2;F7CR78;A2ASS6-3;A2AT70;F6RSJ3;Q8BUJ6;A2AT68;A2AT65;A2AT64;A2AT67;A2AT66	A2ASS6;E9Q8N1;E9Q8K5;A2ASS6-2	Titin	Ttn	28.1563	28.7011	27.6118	28.2296	28.1934	30.6596	31.0321	31.2419	32.2284	32.7529	+	2.08644	0	2.68943	254	254	254	8.6	8.6	8.6	3906.4	0	323.31	102850000000	786	actin cytoskeleton organization;actin filament organization;actin filament-based process;actomyosin structure organization;adult heart development;anatomical structure development;anatomical structure formation involved in morphogenesis;anatomical structure morphogenesis;anterior/posterior pattern specification;biological regulation;cardiac muscle contraction;cardiac muscle fiber development;card…	adenyl nucleotide binding;adenyl ribonucleotide binding;ATP binding;binding;calcium ion binding;catalytic activity;cation binding;enzyme regulator activity;GTPase regulator activity;guanyl-nucleotide exchange factor activity;ion binding;kinase activity;metal ion binding;nucleic acid binding;nucleoside-triphosphatase regulator activity;nucleotide binding;phosphotransferase activity, alcohol group …	cell part;chromosome;condensed chromosome;condensed nuclear chromosome;contractile fiber part;cytoplasmic part;cytoskeletal part;Golgi apparatus;intracellular membrane-bounded organelle;intracellular non-membrane-bounded organelle;intracellular organelle;intracellular organelle part;intracellular part;M band;macromolecular complex;membrane-bounded organelle;muscle myosin complex;myosin complex;my…	Dilated cardiomyopathy;Hypertrophic cardiomyopathy (HCM)	Alternativesplicing;ATP-binding;Calcium;Calmodulin-binding;Coiledcoil;Completeproteome;Cytoplasm;Directproteinsequencing;Disulfidebond;Immunoglobulindomain;Isopeptidebond;Kelchrepeat;Kinase;Magnesium;Metal-binding;Nucleotide-binding;Nucleus;Phosphoprotein;Referenceproteome;Repeat;Serine/threonine-proteinkinase;TPRrepeat;Transferase;Ublconjugation;WDrepeat
A2ASZ8;A2ASZ8-4;A2ASZ8-5;A2ASZ8-2;A2ASZ8-3	A2ASZ8;A2ASZ8-4;A2ASZ8-5;A2ASZ8-2;A2ASZ8-3	Calcium-binding mitochondrial carrier protein SCaMC-2	Slc25a25	NaN	NaN	NaN	NaN	NaN	NaN	NaN	NaN	NaN	NaN		-4.34294e-08	1	0	2	2	2	4.1	4.1	4.1	52.62	0.00050826	2.0058	248390000	8	cellular process;establishment of localization;transmembrane transport;transport	binding;calcium ion binding;cation binding;ion binding;metal ion binding	cell part;cytoplasmic part;integral to membrane;intracellular membrane-bounded organelle;intracellular organelle;intracellular organelle part;intracellular part;intrinsic to membrane;membrane;membrane part;membrane-bounded organelle;mitochondrial inner membrane;mitochondrial membrane;mitochondrial part;mitochondrion;organelle;organelle inner membrane;organelle membrane;organelle part		Alternativesplicing;Calcium;Completeproteome;Membrane;Metal-binding;Mitochondrion;Mitochondrioninnermembrane;Referenceproteome;Repeat;Transmembrane;Transmembranehelix;Transport
Q99JX3;A2ATI9;A2ATI8;A2ATI6;Q99JX3-2	Q99JX3;A2ATI9;A2ATI8;A2ATI6;Q99JX3-2	Golgi reassembly-stacking protein 2	Gorasp2	NaN	NaN	NaN	NaN	NaN	26.6088	27.0055	27.0114	26.7225	26.9222		0	0.957194	NaN	7	7	7	22.4	22.4	22.4	47.038	0	56.185	5944700000	23	cellular component organization;cellular component organization at cellular level;cellular component organization or biogenesis;cellular component organization or biogenesis at cellular level;cellular process;organelle organization		cell part;cytoplasmic part;Golgi apparatus part;Golgi membrane;intracellular organelle part;intracellular part;membrane;organelle membrane;organelle part		Alternativesplicing;Completeproteome;Golgiapparatus;Lipoprotein;Membrane;Methylation;Myristate;Palmitate;Phosphoprotein;Referenceproteome
Q8C854;A2ATP5;A2ATP6;Q8C854-3;G8JL68;Q8C854-2;F6XJA1;Q8C854-1	Q8C854;A2ATP5;A2ATP6;Q8C854-3;G8JL68;Q8C854-2;F6XJA1;Q8C854-1	Myelin expression factor 2	Myef2	26.0241	25.6855	25.9544	26.6305	NaN	26.9584	26.7849	26.6191	26.5231	26.5735	+	2.15767	0.00546032	0.983689	5	5	5	9.8	9.8	9.8	63.294	0	177.48	2361600000	41	biosynthetic process;cellular biosynthetic process;cellular macromolecule biosynthetic process;cellular macromolecule metabolic process;cellular metabolic process;cellular nitrogen compound metabolic process;cellular process;macromolecule biosynthetic process;macromolecule metabolic process;metabolic process;nitrogen compound metabolic process;nucleic acid metabolic process;nucleobase-containing …	binding;DNA binding;nucleic acid binding;nucleotide binding;RNA binding	cell part;intracellular membrane-bounded organelle;intracellular organelle;intracellular part;membrane-bounded organelle;nucleus;organelle		Alternativesplicing;Completeproteome;DNA-binding;Nucleus;Phosphoprotein;Referenceproteome;Repeat;Repressor;RNA-binding;Transcription
P97290;A2ATR8	P97290;A2ATR8	Plasma protease C1 inhibitor	Serping1	25.6662	25.3399	25.359	NaN	24.8258	25.5761	NaN	25.032	25.4735	26.1034		0	0.956769	0.121087	4	4	4	10.1	10.1	10.1	55.584	0	12.146	1933400000	25	activation of immune response;biological regulation;blood coagulation;coagulation;complement activation;complement activation, classical pathway;defense response;fibrinolysis;hemostasis;humoral immune response;immune effector process;immune response;immune system process;innate immune response;macromolecule metabolic process;metabolic process;multicellular organismal process;negative regulation o…	endopeptidase inhibitor activity;endopeptidase regulator activity;enzyme inhibitor activity;enzyme regulator activity;peptidase inhibitor activity;peptidase regulator activity;serine-type endopeptidase inhibitor activity	extracellular region part;extracellular space	Complement and coagulation cascades	Bloodcoagulation;Complementpathway;Completeproteome;Disulfidebond;Fibrinolysis;Glycoprotein;Hemostasis;Immunity;Innateimmunity;Phosphoprotein;Proteaseinhibitor;Referenceproteome;Secreted;Serineproteaseinhibitor;Signal
Q8BY71;A2ATU9	Q8BY71;A2ATU9	Histone acetyltransferase type B catalytic subunit	Hat1	NaN	NaN	NaN	NaN	NaN	NaN	21.4145	NaN	NaN	NaN		0	0.956344	NaN	1	1	1	6.2	6.2	6.2	49.278	0.00050327	1.9151	40845000	1	biological regulation;cellular process;chromatin silencing;chromatin silencing at telomere;gene silencing;negative regulation of biological process;negative regulation of biosynthetic process;negative regulation of cellular biosynthetic process;negative regulation of cellular macromolecule biosynthetic process;negative regulation of cellular metabolic process;negative regulation of cellular proce…	acetyltransferase activity;catalytic activity;histone acetyltransferase activity;lysine N-acetyltransferase activity;N-acetyltransferase activity;N-acyltransferase activity;transferase activity;transferase activity, transferring acyl groups;transferase activity, transferring acyl groups other than amino-acyl groups	cell part;intracellular membrane-bounded organelle;intracellular organelle;intracellular organelle part;intracellular part;membrane-bounded organelle;nuclear matrix;nuclear part;nucleus;organelle;organelle part		Acyltransferase;Completeproteome;Nucleus;Referenceproteome;Transferase
A2AU52;Q8BG94	A2AU52;Q8BG94	COMM domain-containing protein 7	Commd7	24.0745	NaN	24.3827	NaN	24.4338	24.4346	24.6979	NaN	NaN	24.3301		0.624176	0.185381	0.337675	4	4	4	34.1	34.1	34.1	14.683	0	10.187	1172600000	33	biological regulation;cell surface receptor linked signaling pathway;cellular process;cellular response to chemical stimulus;cellular response to cytokine stimulus;cellular response to organic substance;cellular response to stimulus;cellular response to tumor necrosis factor;cytokine-mediated signaling pathway;negative regulation of biological process;negative regulation of biosynthetic process;n…				Completeproteome;Referenceproteome
Q64012;Q64012-2;A2AU62;A2AU61;A2AU60	Q64012;Q64012-2;A2AU62;A2AU61;A2AU60	RNA-binding protein Raly	Raly	29.2146	29.1914	29.2255	28.7872	29.2884	29.4744	29.2453	29.2706	29.0236	28.952		0.739529	0.282933	0.149354	14	14	14	44.9	44.9	44.9	33.188	0	98.685	19413000000	155	cellular macromolecule metabolic process;cellular metabolic process;cellular nitrogen compound metabolic process;cellular process;macromolecule metabolic process;metabolic process;mRNA metabolic process;mRNA processing;nitrogen compound metabolic process;nucleic acid metabolic process;nucleobase-containing compound metabolic process;primary metabolic process;RNA metabolic process;RNA processing;R…	binding;nucleic acid binding;nucleotide binding;RNA binding	catalytic step 2 spliceosome;cell part;intracellular organelle part;intracellular part;macromolecular complex;nuclear part;organelle part;ribonucleoprotein complex;spliceosomal complex		Acetylation;Alternativesplicing;Completeproteome;mRNAprocessing;mRNAsplicing;Nucleus;Phosphoprotein;Referenceproteome;Ribonucleoprotein;RNA-binding;Spliceosome
A2AUC9	A2AUC9	Kelch-like protein 41	Klhl41	NaN	NaN	NaN	NaN	NaN	NaN	26.5466	25.7224	26.916	26.9247		0	0.95592	NaN	4	4	4	8.6	8.6	8.6	68.189	0	15.737	2063200000	22	actin cytoskeleton organization;actin filament-based process;actomyosin structure organization;anatomical structure formation involved in morphogenesis;biological regulation;cell differentiation;cellular component assembly;cellular component assembly at cellular level;cellular component assembly involved in morphogenesis;cellular component organization;cellular component organization at cellular …		cell part;cell projection;centrosome;contractile fiber part;cytoplasmic part;cytoskeletal part;cytoskeleton;intracellular non-membrane-bounded organelle;intracellular organelle;intracellular organelle part;intracellular part;M band;membrane;microtubule organizing center;non-membrane-bounded organelle;nuclear part;nucleolus;organelle;organelle part;plasma membrane;pseudopodium;ruffle		Cellprojection;Completeproteome;Cytoplasm;Cytoskeleton;Kelchrepeat;Referenceproteome;Repeat;Ublconjugation
Q9CYZ2;A2AUD5;V9GWU5;Q3TAI4	Q9CYZ2;A2AUD5;V9GWU5;Q3TAI4	Tumor protein D54	Tpd52l2	29.0371	28.6302	29.0832	28.8589	28.3829	28.8532	28.7553	28.7226	28.8842	28.8126		0.226192	0.587021	-0.112565	8	8	3	35.9	35.9	12.7	24.043	0	301.18	23419000000	112			cell part;cytoplasmic part;intracellular part;perinuclear region of cytoplasm		Acetylation;Coiledcoil;Completeproteome;Phosphoprotein;Referenceproteome
P60904;A2AUE1;G5E8T0	P60904;A2AUE1;G5E8T0	DnaJ homolog subfamily C member 5	Dnajc5	26.1411	NaN	NaN	26.5672	NaN	26.5057	26.7279	26.379	26.5486	26.6084		0	0.955496	0.47575	2	2	2	12.1	12.1	12.1	22.101	0	156.48	3111700000	32	biological regulation;negative regulation of apoptosis;negative regulation of biological process;negative regulation of cell death;negative regulation of cellular process;negative regulation of neuron apoptosis;negative regulation of programmed cell death;regulation of apoptosis;regulation of biological process;regulation of cell death;regulation of cellular process;regulation of neuron apoptosis…		cell part;clathrin-coated vesicle;coated vesicle;cytoplasmic membrane-bounded vesicle;cytoplasmic part;cytoplasmic vesicle;intracellular membrane-bounded organelle;intracellular organelle;intracellular part;melanosome;membrane;membrane-bounded organelle;membrane-bounded vesicle;organelle;pigment granule;plasma membrane;synapse part;synaptic vesicle;vesicle	Protein processing in endoplasmic reticulum	3D-structure;Acetylation;Cellmembrane;Chaperone;Completeproteome;Directproteinsequencing;Lipoprotein;Membrane;Palmitate;Phosphoprotein;Referenceproteome
A2AUK5;A2AUK8;Q9Z2H5;E9PV14;A2AUK6;A2AUK7;Q9Z2H5-3;Q9Z2H5-2;A2A842;P48193-2	A2AUK5;A2AUK8;Q9Z2H5;E9PV14;A2AUK6;A2AUK7;Q9Z2H5-3;Q9Z2H5-2	Band 4.1-like protein 1	Epb4.1l1;Epb41l1	NaN	NaN	NaN	NaN	NaN	NaN	NaN	NaN	NaN	26.2457		-4.34294e-08	1	0	4	3	2	5.7	4.3	2.6	98.314	0.0021834	1.6015	1386800000	4	actin cytoskeleton organization;actin filament-based process;biological regulation;cellular component organization;cellular component organization at cellular level;cellular component organization or biogenesis;cellular component organization or biogenesis at cellular level;cellular process;cortical actin cytoskeleton organization;cortical cytoskeleton organization;cytoskeleton organization;organ…	1-phosphatidylinositol binding;actin binding;binding;cytoskeletal protein binding;lipid binding;phosphatidylinositol binding;phospholipid binding;protein binding;spectrin binding;structural molecule activity	actin cytoskeleton;cell cortex part;cell part;cortical cytoskeleton;cytoplasm;cytoplasmic part;cytoskeleton;extrinsic to membrane;Golgi apparatus;intracellular membrane-bounded organelle;intracellular non-membrane-bounded organelle;intracellular organelle;intracellular part;macromolecular complex;membrane;membrane part;membrane-bounded organelle;non-membrane-bounded organelle;nucleus;organelle;pl…	Tight junction	Actin-binding;Alternativesplicing;Calmodulin-binding;Completeproteome;Cytoplasm;Cytoskeleton;Directproteinsequencing;Glycoprotein;Nucleus;Phosphoprotein;Referenceproteome
P16254;A2AUM6	P16254;A2AUM6	Signal recognition particle 14 kDa protein;Signal recognition particle 14 kDa protein, N-terminally processed	Srp14	NaN	NaN	NaN	NaN	NaN	NaN	NaN	NaN	NaN	NaN		-4.34294e-08	1	0	1	1	1	10.9	10.9	10.9	12.51	0	6.2918	490480000	9	cotranslational protein targeting to membrane;establishment of localization;establishment of localization in cell;establishment of protein localization;establishment of protein localization in endoplasmic reticulum;establishment of protein localization to organelle;intracellular protein transport;intracellular transport;protein targeting;protein targeting to ER;protein targeting to membrane;prote…	7S RNA binding;binding;endoplasmic reticulum signal peptide binding;nucleic acid binding;peptide binding;RNA binding;signal sequence binding	cell part;cytoplasmic part;intracellular part;macromolecular complex;ribonucleoprotein complex;signal recognition particle;signal recognition particle, endoplasmic reticulum targeting	Protein export	3D-structure;Completeproteome;Cytoplasm;Directproteinsequencing;Phosphoprotein;Referenceproteome;Ribonucleoprotein;RNA-binding;Signalrecognitionparticle
Q60866;A2AUR3;Q60866-2;A2AUR5	Q60866;A2AUR3;Q60866-2;A2AUR5	Phosphotriesterase-related protein	Pter	24.3715	24.6424	NaN	NaN	NaN	24.4317	23.9907	24.8632	NaN	24.5934		0.430144	0.298625	-0.29577	4	4	4	14	14	14	39.218	0	10.466	793660000	21	catabolic process;metabolic process	binding;catalytic activity;cation binding;hydrolase activity;hydrolase activity, acting on ester bonds;ion binding;metal ion binding;transition metal ion binding;zinc ion binding			Alternativesplicing;Completeproteome;Hydrolase;Metal-binding;Referenceproteome
Q3UHC7;F6QQP6;F6RK07;A2AUX5;A2AUX3;B7ZD29;Q3UHC7-2;Q3UHC7-4;Q3UHC7-3;F6SEU4;E9PW37;D3YUS5;A0A0A6YVS6;J3QQ18	Q3UHC7;F6QQP6;F6RK07;A2AUX5;A2AUX3;B7ZD29;Q3UHC7-2;Q3UHC7-4;Q3UHC7-3;F6SEU4;E9PW37;D3YUS5;A0A0A6YVS6;J3QQ18	Disabled homolog 2-interacting protein;Ras/Rap GTPase-activating protein SynGAP	Dab2ip;Syngap1;Rasal2	NaN	23.2536	23.6413	24.0003	NaN	23.805	NaN	23.8919	24.2123	23.8124		0	0.955073	0.357521	2	2	2	1.7	1.7	1.7	131.72	0.00027293	2.6107	176790000	12	activation of MAPKKK activity;activation of protein kinase activity;anatomical structure development;anatomical structure formation involved in morphogenesis;anatomical structure morphogenesis;angiogenesis;apoptosis;apoptosis in response to endoplasmic reticulum stress;associative learning;behavior;biological regulation;catabolic process;cell cycle;cell death;cell motility;cell motility involved …	binding;enzyme activator activity;enzyme regulator activity;GTPase activator activity;GTPase regulator activity;lipid binding;nucleoside-triphosphatase regulator activity;phosphatidylinositol binding;phosphatidylinositol-3-phosphate binding;phosphatidylinositol-4-phosphate binding;phospholipid binding;protein binding;protein complex binding;protein domain specific binding;Rab GTPase activator act…	axon;cell body membrane;cell junction;cell part;cell projection;cell projection part;cerebellar mossy fiber;climbing fiber;cytoplasm;cytoplasmic membrane-bounded vesicle;cytoplasmic part;cytoplasmic vesicle;dendrite;dendritic shaft;endocytic vesicle;intracellular membrane-bounded organelle;intracellular organelle;intracellular part;intrinsic to internal side of plasma membrane;intrinsic to membra…		Alternativesplicing;Angiogenesis;Apoptosis;Cellcycle;Celljunction;Cellmembrane;Cellprojection;Coiledcoil;Completeproteome;Cytoplasm;Developmentalprotein;Growthregulation;GTPaseactivation;Immunity;Inflammatoryresponse;Innateimmunity;Membrane;Phosphoprotein;Referenceproteome;SH3-binding;Stressresponse;Synapse;Tumorsuppressor;Unfoldedproteinresponse
Q8VBV3;A2AV19	Q8VBV3;A2AV19	Exosome complex component RRP4	Exosc2	NaN	NaN	NaN	NaN	NaN	NaN	NaN	NaN	NaN	NaN		-4.34294e-08	1	0	1	1	1	5.1	5.1	5.1	32.631	0.0021892	1.62	231910000	10	biological regulation;cellular macromolecule metabolic process;cellular metabolic process;cellular nitrogen compound metabolic process;cellular process;macromolecule metabolic process;metabolic process;ncRNA metabolic process;ncRNA processing;nitrogen compound metabolic process;nucleic acid metabolic process;nucleobase-containing compound metabolic process;positive regulation of biological proces…	binding;nucleic acid binding;RNA binding	cell part;cytoplasm;exosome (RNase complex);intracellular non-membrane-bounded organelle;intracellular organelle;intracellular organelle part;intracellular part;macromolecular complex;non-membrane-bounded organelle;nuclear part;nucleolus;organelle;organelle part;protein complex	RNA degradation	Completeproteome;Cytoplasm;Exosome;Nucleus;Phosphoprotein;Referenceproteome;RNA-binding;rRNAprocessing
Q99PL5;A2AVJ7;Q99PL5-3;Q99PL5-2;Q99PL5-4;Q99PL5-5;Q99PL5-7;Q99PL5-8;Q99PL5-6;Q99PL5-9;Q99PL5-11;Q99PL5-10;Q99PL5-12	Q99PL5;A2AVJ7	Ribosome-binding protein 1	Rrbp1	31.1301	30.9095	31.0102	30.8673	30.7549	31.5386	31.4294	31.5002	31.0997	31.3307	+	1.8341	0.0212486	0.467434	63	63	63	41.2	41.2	41.2	172.88	0	323.31	289200000000	710	biological regulation;cellular process;cellular response to stimulus;establishment of localization;establishment of protein localization;protein transport;regulation of biological process;regulation of cellular process;response to stimulus;signal transduction;transport		cell part;cytoplasmic part;endoplasmic reticulum part;integral to endoplasmic reticulum membrane;integral to membrane;integral to organelle membrane;intracellular organelle part;intracellular part;intrinsic to endoplasmic reticulum membrane;intrinsic to membrane;intrinsic to organelle membrane;membrane part;organelle part	Protein processing in endoplasmic reticulum	Alternativesplicing;Completeproteome;Endoplasmicreticulum;Membrane;Phosphoprotein;Proteintransport;Referenceproteome;Repeat;Translocation;Transmembrane;Transmembranehelix;Transport
P62627;A2AVR9	P62627;A2AVR9	Dynein light chain roadblock-type 1	Dynlrb1	26.2952	26.1882	26.3413	26.512	26.1881	26.274	26.4117	26.5699	26.4707	26.3386		0.349961	0.592904	0.0680011	2	2	2	29.2	29.2	29.2	10.99	0	54.313	3714800000	40	behavior;establishment of localization;multicellular organismal process;response to abiotic stimulus;response to light stimulus;response to radiation;response to stimulus;transport;visual behavior	catalytic activity;hydrolase activity;hydrolase activity, acting on acid anhydrides;hydrolase activity, acting on acid anhydrides, in phosphorus-containing anhydrides;motor activity;nucleoside-triphosphatase activity;pyrophosphatase activity	cell part;centrosome;cytoplasmic dynein complex;cytoplasmic part;cytoskeletal part;dynein complex;intracellular non-membrane-bounded organelle;intracellular organelle;intracellular organelle part;intracellular part;macromolecular complex;microtubule;microtubule associated complex;microtubule organizing center;non-membrane-bounded organelle;organelle;organelle part;protein complex		3D-structure;Acetylation;Completeproteome;Cytoplasm;Cytoskeleton;Dynein;Microtubule;Motorprotein;Referenceproteome;Transport
Q08943;A2AW05;Q08943-2	Q08943;A2AW05;Q08943-2	FACT complex subunit SSRP1	Ssrp1	26.771	27.137	27.3132	27.1094	27.1904	27.9856	27.7704	27.5815	27.4491	27.5116	+	1.44557	0.0203386	0.804248	9	9	9	13.8	13.8	13.8	80.859	0	22.37	5927100000	109	biological regulation;biosynthetic process;cellular biosynthetic process;cellular macromolecule biosynthetic process;cellular macromolecule metabolic process;cellular metabolic process;cellular nitrogen compound metabolic process;cellular process;cellular response to stimulus;cellular response to stress;DNA metabolic process;DNA repair;DNA replication;macromolecule biosynthetic process;macromolec…	binding;chromatin binding;DNA binding;nucleic acid binding	cell part;chromosome;cytoplasm;intracellular membrane-bounded organelle;intracellular non-membrane-bounded organelle;intracellular organelle;intracellular organelle part;intracellular part;membrane-bounded organelle;non-membrane-bounded organelle;nuclear part;nucleolus;nucleus;organelle;organelle part		Acetylation;Alternativesplicing;Chromosome;Completeproteome;DNA-binding;DNAdamage;DNArepair;DNAreplication;Nucleus;Phosphoprotein;Referenceproteome;Transcription;Transcriptionregulation;Ublconjugation
A2AWA9;A2AWA9-2;A2AWA7;A6H6A9-3;A0A0A6YWT4;A0A0A6YY35;A2AWA9-3	A2AWA9;A2AWA9-2	Rab GTPase-activating protein 1	Rabgap1	NaN	NaN	NaN	NaN	25.3038	25.3929	25.5141	NaN	NaN	NaN		0	0.95465	NaN	7	7	6	7.1	7.1	6.3	120.8	0	6.0534	1188400000	15	anatomical structure development;biological regulation;cell cycle;cell development;cellular developmental process;cellular process;developmental process;megakaryocyte development;positive regulation of catalytic activity;positive regulation of GTPase activity;positive regulation of hydrolase activity;positive regulation of molecular function;positive regulation of Rab GTPase activity;positive reg…	enzyme activator activity;enzyme regulator activity;GTPase activator activity;GTPase regulator activity;nucleoside-triphosphatase regulator activity;Rab GTPase activator activity;Ras GTPase activator activity;small GTPase regulator activity	cell part;cytoplasmic part;cytoskeletal part;cytosol;early endosome;endosome;Golgi apparatus;intracellular membrane-bounded organelle;intracellular organelle;intracellular organelle part;intracellular part;membrane-bounded organelle;microtubule organizing center;nucleus;organelle;organelle part		Alternativesplicing;Cellcycle;Coiledcoil;Completeproteome;Cytoplasm;Cytoskeleton;GTPaseactivation;Phosphoprotein;Referenceproteome
Q8R3V5;A2AWI9;A2AWI7;Q8R3V5-3;Q8R3V5-1	Q8R3V5;A2AWI9;A2AWI7;Q8R3V5-3;Q8R3V5-1	Endophilin-B2	Sh3glb2	26.3084	26.5656	25.7273	26.473	26.4959	26.0292	25.8436	26.3613	25.9929	26.2785		0.319622	0.398465	-0.264069	7	6	6	19	17	17	44.503	0	10.468	2356000000	51			cell part;cytoplasm;intracellular membrane-bounded organelle;intracellular organelle;intracellular part;membrane-bounded organelle;nucleus;organelle	Endocytosis	Alternativesplicing;Coiledcoil;Completeproteome;Cytoplasm;Referenceproteome;SH3domain
P25976;A2AWT6;A2AWT7;A2AWT5;P25976-2;E9Q4A8;G3UZW9	P25976;A2AWT6;A2AWT7;A2AWT5;P25976-2	Nucleolar transcription factor 1	Ubtf	28.4722	28.7434	28.7735	28.666	28.3855	28.7452	28.567	28.4511	28.2691	28.4564		0.0159817	0.953505	-0.00690365	14	14	14	21.3	21.3	21.3	89.508	0	82.897	13089000000	189	biological regulation;biosynthetic process;cellular biosynthetic process;cellular macromolecule biosynthetic process;cellular macromolecule metabolic process;cellular metabolic process;cellular nitrogen compound metabolic process;cellular process;chromatin silencing;chromatin silencing at rDNA;gene silencing;macromolecule biosynthetic process;macromolecule metabolic process;metabolic process;nega…	binding;DNA binding;nucleic acid binding	cell part;intracellular non-membrane-bounded organelle;intracellular organelle;intracellular organelle part;intracellular part;non-membrane-bounded organelle;nuclear part;nucleolus;organelle;organelle part		3D-structure;Acetylation;Activator;Alternativesplicing;Completeproteome;DNA-binding;Nucleus;Phosphoprotein;Referenceproteome;Repeat;Transcription;Transcriptionregulation
A2BDX0;Q9Z103	A2BDX0;Q9Z103	Activity-dependent neuroprotector homeobox protein	Adnp	NaN	NaN	25.9368	NaN	NaN	26.1794	25.9658	25.8321	25.9029	25.9943		0	0.954228	0.135775	8	8	8	9	9	9	124.31	0	11.539	1946700000	9	biological regulation;biosynthetic process;cellular biosynthetic process;cellular macromolecule biosynthetic process;cellular macromolecule metabolic process;cellular metabolic process;cellular nitrogen compound metabolic process;cellular process;macromolecule biosynthetic process;macromolecule metabolic process;metabolic process;negative regulation of apoptosis;negative regulation of biological …	binding;cation binding;chromatin binding;DNA binding;ion binding;metal ion binding;nucleic acid binding;nucleic acid binding transcription factor activity;sequence-specific DNA binding;sequence-specific DNA binding transcription factor activity;transition metal ion binding;zinc ion binding	cell part;extracellular region part;extracellular space;intracellular membrane-bounded organelle;intracellular organelle;intracellular part;membrane-bounded organelle;nucleus;organelle		Acetylation;Completeproteome;DNA-binding;Homeobox;Metal-binding;Nucleus;Phosphoprotein;Referenceproteome;Repeat;Transcription;Transcriptionregulation;Zinc;Zinc-finger
A2BDX3	A2BDX3	Adenylyltransferase and sulfurtransferase MOCS3;Molybdopterin-synthase adenylyltransferase;Molybdopterin-synthase sulfurtransferase	Mocs3	27.9307	NaN	NaN	NaN	NaN	NaN	NaN	NaN	NaN	NaN		0	0.953805	NaN	1	1	1	2	2	2	49.374	0.0072532	1.281	1896800000	9	aromatic compound biosynthetic process;biosynthetic process;cellular aromatic compound metabolic process;cellular biosynthetic process;cellular macromolecule metabolic process;cellular metabolic process;cellular nitrogen compound biosynthetic process;cellular nitrogen compound metabolic process;cellular process;cellular protein metabolic process;coenzyme biosynthetic process;coenzyme metabolic pr…	adenyl nucleotide binding;adenyl ribonucleotide binding;ATP binding;binding;catalytic activity;cation binding;ion binding;metal ion binding;nucleotide binding;nucleotidyltransferase activity;purine nucleotide binding;purine ribonucleoside triphosphate binding;purine ribonucleotide binding;ribonucleotide binding;small protein activating enzyme activity;sulfurtransferase activity;thiosulfate sulfur…	cell part;cytoplasmic part;cytosol;intracellular part	Sulfur relay system	ATP-binding;Completeproteome;Cytoplasm;Disulfidebond;Metal-binding;Molybdenumcofactorbiosynthesis;Multifunctionalenzyme;Nucleotide-binding;Referenceproteome;Transferase;tRNAprocessing;Zinc
A2BE28;A2BE28-2	A2BE28;A2BE28-2	Ribosomal biogenesis protein LAS1L	Las1l	NaN	NaN	NaN	NaN	NaN	NaN	NaN	NaN	NaN	NaN		-4.34294e-08	1	0	2	2	2	2.8	2.8	2.8	89.413	0	21.173	833160000	3	cellular macromolecule metabolic process;cellular metabolic process;cellular nitrogen compound metabolic process;cellular process;macromolecule metabolic process;metabolic process;ncRNA metabolic process;ncRNA processing;nitrogen compound metabolic process;nucleic acid metabolic process;nucleobase-containing compound metabolic process;primary metabolic process;RNA metabolic process;RNA processing…		cell part;cytoplasm;histone methyltransferase complex;intracellular non-membrane-bounded organelle;intracellular organelle;intracellular organelle part;intracellular part;macromolecular complex;methyltransferase complex;MLL1 complex;non-membrane-bounded organelle;nuclear part;nucleolus;nucleoplasm part;organelle;organelle part;protein complex		Alternativesplicing;Completeproteome;Cytoplasm;Nucleus;Phosphoprotein;Referenceproteome;rRNAprocessing
O88487;Q3TPJ8;A2BFF9;A2BFF8;A2BFF5	O88487;Q3TPJ8;A2BFF9;A2BFF8;A2BFF5	Cytoplasmic dynein 1 intermediate chain 2	Dync1i2	28.6036	28.5157	28.5222	28.8102	28.8798	28.8184	28.7842	28.8039	28.6096	28.6361	+	2.14535	0.0492475	0.254165	10	10	10	24.3	24.3	24.3	68.393	0	299.9	14660000000	134	cellular component movement;cellular process;establishment of localization;microtubule-based movement;microtubule-based process;transport	catalytic activity;hydrolase activity;hydrolase activity, acting on acid anhydrides;hydrolase activity, acting on acid anhydrides, in phosphorus-containing anhydrides;motor activity;nucleoside-triphosphatase activity;pyrophosphatase activity	cell part;centrosome;cytoplasmic dynein complex;cytoplasmic part;cytoskeletal part;dynein complex;intracellular non-membrane-bounded organelle;intracellular organelle;intracellular organelle part;intracellular part;macromolecular complex;microtubule;microtubule associated complex;microtubule organizing center;non-membrane-bounded organelle;organelle;organelle part;protein complex;vesicle	Phagosome;Vasopressin-regulated water reabsorption	Completeproteome;Cytoplasm;Cytoskeleton;Dynein;Microtubule;Motorprotein;Phosphoprotein;Referenceproteome;Repeat;Transport;WDrepeat
P97863;P97863-3;A2BG76;I7HIP8;A2BG75;A2BG77;P97863-2;A2ADI3	P97863;P97863-3;A2BG76;I7HIP8;A2BG75;A2BG77;P97863-2;A2ADI3	Nuclear factor 1 B-type;Nuclear factor 1	Nfib	27.8885	27.6272	27.794	27.5977	27.7448	27.1981	27.2707	26.6461	27.5098	27.1877	+	1.86799	0.0170072	-0.53552	7	4	4	13	7.5	7.5	63.506	0	6.0398	6470400000	50	anatomical structure development;anatomical structure morphogenesis;anterior commissure morphogenesis;axon guidance;axonogenesis;biological regulation;biosynthetic process;cell differentiation;cell part morphogenesis;cell projection morphogenesis;cell projection organization;cellular biosynthetic process;cellular component morphogenesis;cellular component organization;cellular component organizat…	binding;DNA binding;nucleic acid binding;nucleic acid binding transcription factor activity;protein binding transcription factor activity;RNA polymerase II core promoter proximal region sequence-specific DNA binding transcription factor activity;RNA polymerase II core promoter proximal region sequence-specific DNA binding transcription factor activity involved in positive regulation of transcript…	axon;cell part;cell projection;cerebellar mossy fiber;intracellular membrane-bounded organelle;intracellular non-membrane-bounded organelle;intracellular organelle;intracellular organelle part;intracellular part;membrane-bounded organelle;neuron projection;non-membrane-bounded organelle;nuclear part;nucleolus;nucleus;organelle;organelle part		Acetylation;Activator;Alternativesplicing;Completeproteome;DNA-binding;DNAreplication;Nucleus;Phosphoprotein;Referenceproteome;Transcription;Transcriptionregulation
A2BGN7;Q9D8X0	A2BGN7;Q9D8X0	Protein MANBAL	Manbal	NaN	NaN	NaN	NaN	NaN	NaN	NaN	24.9421	NaN	25.2072		-4.34294e-08	1	0	1	1	1	14.1	14.1	14.1	9.3679	0	27.117	1038700000	21			cell part;integral to membrane;intrinsic to membrane;membrane part		Completeproteome;Membrane;Referenceproteome;Transmembrane;Transmembranehelix
A2BH40;E9QAQ7;A2BH40-4;A2BH40-2;A2BH40-3	A2BH40;E9QAQ7;A2BH40-4;A2BH40-2;A2BH40-3	AT-rich interactive domain-containing protein 1A	Arid1a	25.3907	NaN	25.2309	25.2686	25.5336	25.7316	25.2801	25.3581	25.3026	25.3461		0.30022	0.455139	0.195025	6	5	5	2.8	2.5	2.5	242.09	0	3.5463	1435100000	20	anatomical structure development;anatomical structure formation involved in morphogenesis;androgen receptor signaling pathway;ATP-dependent chromatin remodeling;biological regulation;biosynthetic process;blood vessel development;cardiac chamber development;cellular biosynthetic process;cellular component disassembly;cellular component disassembly at cellular level;cellular component organization;…	binding;DNA binding;nucleic acid binding	cell part;chromatin;chromatin remodeling complex;chromosomal part;intracellular organelle part;intracellular part;macromolecular complex;nBAF complex;npBAF complex;nuclear chromatin;nuclear chromosome part;nuclear part;organelle part;protein complex;SWI/SNF complex;SWI/SNF-type complex		Acetylation;Alternativesplicing;Chromatinregulator;Completeproteome;DNA-binding;Neurogenesis;Nucleus;Phosphoprotein;Referenceproteome;Transcription;Transcriptionregulation
G5E8W8;A2BI37;Q62394	G5E8W8;A2BI37;Q62394	Zinc finger protein 185	Zfp185;Znf185	NaN	NaN	NaN	NaN	NaN	NaN	NaN	NaN	24.7499	24.9373		-4.34294e-08	1	0	4	4	4	11.9	11.9	11.9	52.871	0	23.249	973350000	11		binding;cation binding;ion binding;metal ion binding;transition metal ion binding;zinc ion binding	adherens junction;anchoring junction;cell junction;cell part;cell-substrate adherens junction;cell-substrate junction;cytoplasm;cytoskeleton;focal adhesion;intracellular non-membrane-bounded organelle;intracellular organelle;intracellular part;non-membrane-bounded organelle;organelle		Celljunction;Completeproteome;Cytoplasm;Cytoskeleton;LIMdomain;Metal-binding;Referenceproteome;Zinc
P11589;A2BIN1;P11588;A9R9W0;A2BIM8;P02762;B5X0G2;A2CEK9;A2BIN0;B8JI96;Q58EV3;B5TE77;A2CEL1;A2CEK7;A2CEK6;A2AKN9;A2AKN8;P04938;P11591	P11589;A2BIN1;P11588;A9R9W0;A2BIM8;P02762;B5X0G2;A2CEK9;A2BIN0;B8JI96;Q58EV3;B5TE77;A2CEL1;A2CEK7;A2CEK6;A2AKN9;A2AKN8;P04938;P11591	Major urinary protein 2;Major urinary protein 1;Major urinary protein 6;Major urinary protein 17;Major urinary proteins 11 and 8;Major urinary protein 5	Mup2;Mup10;Mup1;Mup15;Mup9;Mup6;Mup17;Mup11;Mup14;Mup5;Mup13;Mup4;Mup8	NaN	NaN	NaN	NaN	NaN	NaN	NaN	NaN	NaN	NaN		-4.34294e-08	1	0	2	2	2	12.2	12.2	12.2	20.663	0	3.6632	288600000	6	aerobic respiration;anatomical structure morphogenesis;behavior;biological regulation;carbohydrate homeostasis;cell communication;cell part morphogenesis;cellular component morphogenesis;cellular component organization;cellular component organization at cellular level;cellular component organization or biogenesis;cellular component organization or biogenesis at cellular level;cellular development…	binding;catalytic activity;insulin-activated receptor activity;kinase activity;molecular transducer activity;odorant binding;pheromone binding;phosphotransferase activity, alcohol group as acceptor;protein kinase activity;protein tyrosine kinase activity;receptor activity;signal transducer activity;signaling receptor activity;transferase activity;transferase activity, transferring phosphorus-cont…	cell part;cytoplasmic part;cytosol;extracellular region;extracellular region part;extracellular space;intracellular membrane-bounded organelle;intracellular organelle;intracellular part;membrane-bounded organelle;nucleus;organelle		3D-structure;Acetylation;Allergen;Completeproteome;Disulfidebond;Pheromone-binding;Referenceproteome;Secreted;Signal;Transport
P35283;A2CG35	P35283;A2CG35	Ras-related protein Rab-12	Rab12	NaN	25.6961	NaN	NaN	NaN	25.2734	NaN	NaN	NaN	25.335		0	0.953383	-0.42271	4	4	4	18.1	18.1	18.1	27.328	0	4.0628	1067400000	19	biological regulation;catabolic process;cellular catabolic process;cellular macromolecule catabolic process;cellular macromolecule metabolic process;cellular metabolic process;cellular process;cellular protein catabolic process;cellular protein metabolic process;cellular response to stimulus;endosome to lysosome transport;endosome transport;establishment of localization;establishment of localizat…	binding;GDP binding;GTP binding;guanyl nucleotide binding;guanyl ribonucleotide binding;nucleotide binding;purine nucleotide binding;purine ribonucleoside triphosphate binding;purine ribonucleotide binding;ribonucleotide binding	cell part;cytoplasmic part;endosomal part;endosome membrane;Golgi apparatus part;Golgi membrane;intracellular membrane-bounded organelle;intracellular organelle;intracellular organelle part;intracellular part;lysosomal membrane;lysosome;lytic vacuole;membrane;membrane-bounded organelle;organelle;organelle membrane;organelle part;recycling endosome membrane;vacuolar membrane;vacuolar part;vacuole		Completeproteome;Endosome;Golgiapparatus;GTP-binding;Lipoprotein;Lysosome;Membrane;Nucleotide-binding;Phosphoprotein;Prenylation;Proteintransport;Referenceproteome;Transport
A2RSX9;E9Q3G5;E9QAY5	A2RSX9;E9Q3G5;E9QAY5		Arfip1	NaN	NaN	NaN	NaN	NaN	NaN	NaN	NaN	NaN	NaN		-4.34294e-08	1	0	6	1	1	28.2	4.1	4.1	38.416	0.00050981	2.0309	147170000	1	biological regulation;establishment of localization;establishment of localization in cell;establishment of protein localization;intracellular protein transport;intracellular transport;protein transport;regulation of biological process;regulation of cellular localization;regulation of cellular process;regulation of establishment of protein localization;regulation of localization;regulation of prot…		cell part;cytoplasmic part;cytosol;Golgi apparatus part;Golgi membrane;intracellular organelle part;intracellular part;membrane;organelle membrane;organelle part		Completeproteome;Referenceproteome
A3KFM7;A3KFM7-2;Q09XV5;A2AJK6;Q8BYH8;F7AL76;Q8BYH8-2;A2AJK6-3	A3KFM7;A3KFM7-2;Q09XV5;A2AJK6;Q8BYH8;F7AL76;Q8BYH8-2;A2AJK6-3	Chromodomain-helicase-DNA-binding protein 6;Chromodomain-helicase-DNA-binding protein 8;Chromodomain-helicase-DNA-binding protein 7;Chromodomain-helicase-DNA-binding protein 9	Chd6;Chd8;Chd7;Chd9	NaN	NaN	NaN	27.7948	NaN	NaN	NaN	NaN	27.6509	NaN		-4.34294e-08	1	0	2	2	2	0.7	0.7	0.7	305.39	0.002416	1.5731	4235400000	6	adult behavior;adult heart development;adult locomotory behavior;adult walking behavior;anatomical structure development;anatomical structure morphogenesis;appendage morphogenesis;artery morphogenesis;ATP-dependent chromatin remodeling;behavior;biological regulation;biosynthetic process;blood circulation;blood vessel morphogenesis;camera-type eye development;canonical Wnt receptor signaling pathw…	adenyl nucleotide binding;adenyl ribonucleotide binding;ATP binding;ATPase activity;ATPase activity, coupled;ATP-dependent helicase activity;beta-catenin binding;binding;catalytic activity;chromatin binding;DNA binding;DNA helicase activity;DNA-dependent ATPase activity;helicase activity;histone binding;hydrolase activity;hydrolase activity, acting on acid anhydrides;hydrolase activity, acting on…	cell part;cytoplasm;histone methyltransferase complex;intracellular membrane-bounded organelle;intracellular organelle;intracellular organelle part;intracellular part;macromolecular complex;membrane-bounded organelle;methyltransferase complex;MLL1 complex;nuclear part;nucleoplasm part;nucleus;organelle;organelle part;protein complex	Wnt signaling pathway	Acetylation;Activator;Alternativesplicing;ATP-binding;Chromatinregulator;Coiledcoil;Completeproteome;Cytoplasm;DNA-binding;Helicase;Hydrolase;Isopeptidebond;Nucleotide-binding;Nucleus;Phosphoprotein;Referenceproteome;Repeat;Repressor;rRNAprocessing;Transcription;Transcriptionregulation;Ublconjugation;Wntsignalingpathway
Q6PHQ9;Q91YZ8;D3Z5M2;A3KFU5;A3KFU8;V9GXG3;G5E8X2;A0A0A6YWT2	Q6PHQ9;Q91YZ8;D3Z5M2;A3KFU5;A3KFU8	Polyadenylate-binding protein	Pabpc4;Gm10110	26.3047	26.011	26.3867	25.7084	26.532	27.5168	27.0445	27.0071	26.7028	26.605	+	1.70393	0.0129	1.04648	13	9	8	21.7	14.2	12.9	72.242	0	45.328	4915300000	61		binding;nucleic acid binding;nucleotide binding;RNA binding		mRNA surveillance pathway;RNA degradation;RNA transport	Completeproteome;Referenceproteome
P54763;A3KG01;A3KG02;A3KG00;P54763-2;Q8CBF3	P54763;A3KG01;A3KG02;A3KG00;P54763-2;Q8CBF3	Ephrin type-B receptor 2;Receptor protein-tyrosine kinase;Ephrin type-B receptor 1	Ephb2;Ephb1	27.8811	28.0933	NaN	NaN	NaN	NaN	NaN	NaN	NaN	NaN		0	0.952962	NaN	3	2	2	3.4	2.6	2.6	110.76	0	3.4066	1708400000	8	anatomical structure development;anatomical structure formation involved in morphogenesis;anatomical structure morphogenesis;angiogenesis;axon guidance;axonal fasciculation;axonogenesis;behavior;biological adhesion;biological regulation;camera-type eye morphogenesis;cell adhesion;cell chemotaxis;cell migration;cell motility;cell part morphogenesis;cell projection morphogenesis;cell projection org…	adenyl nucleotide binding;adenyl ribonucleotide binding;ATP binding;axon guidance receptor activity;binding;catalytic activity;ephrin receptor activity;kinase activity;molecular transducer activity;nucleotide binding;phosphotransferase activity, alcohol group as acceptor;protein kinase activity;protein tyrosine kinase activity;purine nucleotide binding;purine ribonucleoside triphosphate binding;p…	axon;cell body;cell part;cell projection;cytoplasmic part;dendrite;early endosome membrane;endosomal part;endosome membrane;integral to membrane;integral to plasma membrane;intracellular organelle part;intracellular part;intrinsic to membrane;intrinsic to plasma membrane;membrane;membrane part;membrane raft;neuron projection;neuronal cell body;organelle membrane;organelle part;plasma membrane par…	Axon guidance	3D-structure;Alternativesplicing;ATP-binding;Celladhesion;Cellmembrane;Cellprojection;Completeproteome;Developmentalprotein;Disulfidebond;Endosome;Glycoprotein;Kinase;Membrane;Neurogenesis;Nucleotide-binding;Phosphoprotein;Receptor;Referenceproteome;Repeat;Signal;Transferase;Transmembrane;Transmembranehelix;Tyrosine-proteinkinase;Ublconjugation
Q8VBX6;A3KG81;D3YUX2;Q8VBX6-2;Q8VBX6-4;Q8VBX6-3;A3KG82;A3KG83;A3KG84	Q8VBX6;A3KG81;D3YUX2;Q8VBX6-2;Q8VBX6-4;Q8VBX6-3;A3KG82;A3KG83;A3KG84	Multiple PDZ domain protein	Mpdz	NaN	24.2279	NaN	NaN	NaN	NaN	NaN	NaN	NaN	NaN		0	0.952541	NaN	2	2	2	1.2	1.2	1.2	218.71	0.0033565	1.4935	222510000	2	axon ensheathment;biological adhesion;cell adhesion;cellular process;ensheathment of neurons;myelination		apical plasma membrane;apicolateral plasma membrane;cell junction;cell part;cell-cell junction;cytoplasmic part;cytoplasmic vesicle;cytoskeletal part;intracellular organelle;intracellular organelle part;intracellular part;membrane;membrane part;occluding junction;organelle;organelle part;plasma membrane part;postsynaptic density;postsynaptic membrane;Schmidt-Lanterman incisure;synapse part;synapt…	Tight junction	Alternativesplicing;Celljunction;Cellmembrane;Cellprojection;Completeproteome;Membrane;Phosphoprotein;Postsynapticcellmembrane;Referenceproteome;Repeat;Synapse;Synaptosome;Tightjunction
Q6ZQ88;A3KG93;F6Z4I3;G8JL40;F6ZC60	Q6ZQ88;A3KG93;F6Z4I3;G8JL40	Lysine-specific histone demethylase 1A	Kdm1a	NaN	NaN	NaN	NaN	NaN	24.8701	24.6886	NaN	NaN	NaN		0	0.95212	NaN	7	7	7	8.6	8.6	8.6	92.849	0	8.1064	763330000	12	anatomical structure development;biological regulation;biosynthetic process;cell development;cell differentiation;cell proliferation;cellular biosynthetic process;cellular component organization;cellular component organization at cellular level;cellular component organization or biogenesis;cellular component organization or biogenesis at cellular level;cellular developmental process;cellular macr…	androgen receptor binding;binding;catalytic activity;chromatin binding;coenzyme binding;cofactor binding;demethylase activity;DNA binding;flavin adenine dinucleotide binding;histone demethylase activity;histone demethylase activity (H3-dimethyl-K4 specific);histone demethylase activity (H3-K4 specific);histone demethylase activity (H3-K9 specific);hormone receptor binding;ligand-dependent nuclear…	cell part;chromatin;chromosomal part;intracellular organelle part;intracellular part;macromolecular complex;nuclear chromatin;nuclear chromosome part;nuclear part;nucleoplasm part;organelle part;protein complex;transcription factor complex		Chromatinregulator;Coiledcoil;Completeproteome;Developmentalprotein;FAD;Nucleus;Oxidoreductase;Phosphoprotein;Referenceproteome;Repressor;Transcription;Transcriptionregulation
A3KGB4	A3KGB4	TBC1 domain family member 8B	Tbc1d8b	NaN	NaN	NaN	NaN	NaN	NaN	NaN	NaN	NaN	NaN		-4.34294e-08	1	0	8	8	8	8.6	8.6	8.6	127.89	0	85.171	1292500000	24	biological regulation;positive regulation of catalytic activity;positive regulation of GTPase activity;positive regulation of hydrolase activity;positive regulation of molecular function;positive regulation of Rab GTPase activity;positive regulation of Ras GTPase activity;regulation of biological process;regulation of catabolic process;regulation of catalytic activity;regulation of cellular catab…	binding;calcium ion binding;cation binding;enzyme activator activity;enzyme regulator activity;GTPase activator activity;GTPase regulator activity;ion binding;metal ion binding;nucleoside-triphosphatase regulator activity;Rab GTPase activator activity;Ras GTPase activator activity;small GTPase regulator activity	cell part;intracellular		Completeproteome;GTPaseactivation;Referenceproteome;Repeat
P09602;E9Q2Z4;A3KGL9;B7ZCQ3;F6W687;Q5XK38;J3QM43;A0A087WR34	P09602;E9Q2Z4;A3KGL9;B7ZCQ3;F6W687;Q5XK38;J3QM43	Non-histone chromosomal protein HMG-17	Hmgn2;Gm16494;Gm6594	NaN	29.3671	29.6532	NaN	NaN	27.7303	28.6849	29.5585	29.3939	29.7354	+	0.919207	0.0465529	-1.30258	3	3	3	30	30	30	9.4226	0	30.403	15644000000	39		binding;chromatin binding;chromatin DNA binding;DNA binding;nucleic acid binding;nucleosomal DNA binding;nucleosome binding;structure-specific DNA binding	cell part;chromatin;chromosomal part;cytoplasm;intracellular membrane-bounded organelle;intracellular organelle;intracellular organelle part;intracellular part;membrane-bounded organelle;nucleus;organelle;organelle part		Acetylation;Completeproteome;Cytoplasm;Directproteinsequencing;DNA-binding;Nucleus;Phosphoprotein;Referenceproteome
Q9D898;A3KGQ6	Q9D898;A3KGQ6	Actin-related protein 2/3 complex subunit 5-like protein;Actin-related protein 2/3 complex subunit 5	Arpc5l	NaN	NaN	NaN	NaN	NaN	NaN	NaN	NaN	NaN	NaN		-4.34294e-08	1	0	1	1	1	7.8	7.8	7.8	16.98	0.0076424	1.2176	688730000	6	biological regulation;cellular component organization;cellular component organization or biogenesis;regulation of actin cytoskeleton organization;regulation of actin filament length;regulation of actin filament polymerization;regulation of actin filament-based process;regulation of actin polymerization or depolymerization;regulation of anatomical structure size;regulation of biological process;re…		cell part;cytoplasm;cytoskeleton;intracellular non-membrane-bounded organelle;intracellular organelle;intracellular part;non-membrane-bounded organelle;organelle	Bacterial invasion of epithelial cells;Fc gamma R-mediated phagocytosis;Pathogenic Escherichia coli infection;Regulation of actin cytoskeleton;Shigellosis	Actin-binding;Completeproteome;Cytoplasm;Cytoskeleton;Directproteinsequencing;Phosphoprotein;Referenceproteome
E9Q447;A3KGU5;A3KGU9;A3KGU4	E9Q447;A3KGU5		Sptan1	33.8808	33.6912	33.8712	34.0663	33.887	33.5629	33.7501	33.6044	33.7107	33.6787		0.633821	0.300553	-0.157962	128	128	0	58.9	58.9	0	285.34	0	323.31	773650000000	2377		binding;calcium ion binding;cation binding;cytoskeletal protein binding;ion binding;metal ion binding;protein binding;protein dimerization activity;protein heterodimerization activity;spectrin binding	adherens junction;anchoring junction;cell cortex part;cell junction;cell part;cell-cell adherens junction;cell-cell junction;contractile fiber part;cuticular plate;cytoplasmic part;cytoskeletal part;cytoskeleton;fascia adherens;intracellular membrane-bounded organelle;intracellular non-membrane-bounded organelle;intracellular organelle;intracellular organelle part;intracellular part;lateral plasm…		Calcium;Completeproteome;Referenceproteome;Repeat;SH3domain
A3KGU7	A3KGU7		Sptan1	NaN	24.6853	NaN	NaN	NaN	NaN	NaN	NaN	NaN	NaN		0	0.9517	NaN	128	1	0	58.6	0.4	0	285.15	0.00052002	2.1657	1133300000	2		binding;calcium ion binding;cation binding;cytoskeletal protein binding;ion binding;metal ion binding;protein binding;protein dimerization activity;protein heterodimerization activity;spectrin binding	adherens junction;anchoring junction;cell cortex part;cell junction;cell part;cell-cell adherens junction;cell-cell junction;contractile fiber part;cuticular plate;cytoplasmic part;cytoskeletal part;fascia adherens;intracellular organelle part;intracellular part;lateral plasma membrane;membrane part;organelle part;plasma membrane part;Z disc		Completeproteome;Referenceproteome;Repeat
A3KGW5	A3KGW5	Probable inactive glycosyltransferase 25 family member 3	Cercam	NaN	25.9477	26.1931	NaN	NaN	25.2584	24.6416	NaN	NaN	NaN	+	1.10973	0.0275263	-1.12038	4	4	4	7.9	7.9	7.9	67.671	0	3.0709	1390400000	13	biological adhesion;biosynthetic process;carbohydrate biosynthetic process;carbohydrate metabolic process;cell adhesion;cellular biosynthetic process;cellular carbohydrate biosynthetic process;cellular carbohydrate metabolic process;cellular lipid metabolic process;cellular macromolecule biosynthetic process;cellular macromolecule metabolic process;cellular metabolic process;cellular polysacchari…		cell part;cytoplasmic part;endoplasmic reticulum lumen;endoplasmic reticulum part;intracellular organelle lumen;intracellular organelle part;intracellular part;membrane-enclosed lumen;organelle lumen;organelle part		Celladhesion;Completeproteome;Endoplasmicreticulum;Glycoprotein;Referenceproteome;Signal
A3KMP2;A3KMP2-2;D6RH59	A3KMP2;A3KMP2-2	Tetratricopeptide repeat protein 38	Ttc38	NaN	NaN	NaN	NaN	25.5085	25.3609	NaN	NaN	NaN	NaN		0	0.95128	NaN	4	4	4	8.8	8.8	8.8	52.223	0	5.9925	1312300000	16					Alternativesplicing;Completeproteome;Referenceproteome;Repeat;TPRrepeat
Q7M6W1;A3QM89	Q7M6W1;A3QM89	Reticulon	Rtn1	NaN	NaN	NaN	NaN	NaN	NaN	NaN	NaN	NaN	NaN		-4.34294e-08	1	0	6	1	1	28.8	4.8	4.8	23.557	0.0002713	2.557	908610000	19			cell part;cytoplasmic part;endoplasmic reticulum;intracellular membrane-bounded organelle;intracellular organelle;intracellular part;membrane-bounded organelle;organelle		Completeproteome;Referenceproteome
P21844;A4QPC5	P21844;A4QPC5	Chymase	Cma1	NaN	NaN	NaN	NaN	NaN	NaN	NaN	NaN	NaN	NaN		-4.34294e-08	1	0	1	1	1	6.1	6.1	6.1	27.586	0.00051507	2.0896	277970000	4	anatomical structure development;biological regulation;carbohydrate homeostasis;cellular chemical homeostasis;cellular glucose homeostasis;cellular homeostasis;cellular metabolic process;cellular process;cellular response to carbohydrate stimulus;cellular response to chemical stimulus;cellular response to glucose stimulus;cellular response to hexose stimulus;cellular response to monosaccharide st…	binding;catalytic activity;endopeptidase activity;hydrolase activity;peptidase activity;peptidase activity, acting on L-amino acid peptides;peptide binding;serine hydrolase activity;serine-type endopeptidase activity;serine-type peptidase activity	cell part;extracellular matrix;extracellular region;extracellular region part;intracellular	Renin-angiotensin system	Completeproteome;Directproteinsequencing;Disulfidebond;Glycoprotein;Hydrolase;Protease;Referenceproteome;Secreted;Serineprotease;Signal;Zymogen
A6H584	A6H584	Collagen alpha-5(VI) chain	Col6a5	NaN	NaN	NaN	NaN	NaN	NaN	NaN	NaN	NaN	NaN		-4.34294e-08	1	0	4	2	2	1.9	0.7	0.7	289.57	0.00026788	2.414	49709000	2	biological adhesion;cell adhesion;cellular process		collagen;extracellular matrix part;extracellular region;extracellular region part		Celladhesion;Collagen;Completeproteome;Extracellularmatrix;Glycoprotein;Hydroxylation;Referenceproteome;Repeat;Secreted;Signal
A6H5X4;A6H5X4-2;A6H5X4-3;B4XVP9	A6H5X4;A6H5X4-2;A6H5X4-3;B4XVP9	PHD finger protein 11	Phf11;Phf11c	NaN	NaN	NaN	NaN	NaN	NaN	NaN	NaN	NaN	NaN		-4.34294e-08	1	0	2	2	2	7.4	7.4	7.4	37.728	0.0019589	1.674	593950000	6	biological regulation;biosynthetic process;cellular biosynthetic process;cellular macromolecule biosynthetic process;cellular macromolecule metabolic process;cellular metabolic process;cellular nitrogen compound metabolic process;cellular process;macromolecule biosynthetic process;macromolecule metabolic process;metabolic process;nitrogen compound metabolic process;nucleic acid metabolic process;…	binding;cation binding;ion binding;metal ion binding;transition metal ion binding;zinc ion binding	cell part;intracellular membrane-bounded organelle;intracellular organelle;intracellular part;membrane-bounded organelle;nucleus;organelle		Activator;Alternativesplicing;Completeproteome;Metal-binding;Nucleus;Referenceproteome;Transcription;Transcriptionregulation;Zinc;Zinc-finger
A6H5Z3;A6H5Z3-2	A6H5Z3;A6H5Z3-2	Exocyst complex component 6B	Exoc6b	NaN	NaN	NaN	NaN	NaN	NaN	24.8222	24.9689	NaN	NaN		0	0.95086	NaN	4	4	4	6.9	6.9	6.9	94.128	0	15.896	1120200000	16	cellular process;membrane docking;vesicle docking;vesicle docking involved in exocytosis		cell cortex part;cell part;cytoplasmic part;exocyst;intracellular part;macromolecular complex;protein complex		Alternativesplicing;Coiledcoil;Completeproteome;Referenceproteome
Q8BG95;A6H644	Q8BG95;A6H644	Protein phosphatase 1 regulatory subunit 12B;Protein phosphatase 1 regulatory subunit	Ppp1r12b	28.7477	28.2735	28.4079	27.4774	27.7405	28.1024	28.0891	28.15	27.9193	27.7338		0.892884	0.106675	-0.380611	5	4	4	6.5	4.9	4.9	109.05	0	126.95	4693400000	50			actin cytoskeleton;cell part;cytoplasm;cytoskeleton;intracellular non-membrane-bounded organelle;intracellular organelle;intracellular part;membrane;non-membrane-bounded organelle;organelle;plasma membrane	Vascular smooth muscle contraction	Alternativesplicing;ANKrepeat;Completeproteome;Cytoplasm;Phosphoprotein;Referenceproteome;Repeat
A6H6A9;A6H6A9-2	A6H6A9	Rab GTPase-activating protein 1-like	Rabgap1l	NaN	NaN	NaN	NaN	NaN	NaN	NaN	NaN	NaN	NaN		-4.34294e-08	1	0	3	2	2	3.7	2.6	2.6	92.403	0	3.0821	286330000	4	anatomical structure development;biological regulation;cell development;cellular developmental process;cellular process;developmental process;megakaryocyte development;regulation of biological process;regulation of localization;regulation of protein localization	enzyme activator activity;enzyme regulator activity;GTPase activator activity;GTPase regulator activity;nucleoside-triphosphatase regulator activity;Rab GTPase activator activity;Ras GTPase activator activity;small GTPase regulator activity	cell part;cytoplasmic part;early endosome;endosome;Golgi apparatus;intracellular membrane-bounded organelle;intracellular organelle;intracellular part;membrane-bounded organelle;nucleus;organelle		Alternativesplicing;Completeproteome;GTPaseactivation;Phosphoprotein;Referenceproteome
A6H8H2;A6H8H2-2;E9Q449	A6H8H2;A6H8H2-2;E9Q449	DENN domain-containing protein 4C	Dennd4c	24.8118	NaN	NaN	24.6198	NaN	NaN	25.2953	24.7889	25.1772	NaN		0	0.950441	0.483511	8	8	8	5.4	5.4	5.4	211.46	0	8.7703	2226700000	14	cellular component organization;cellular component organization or biogenesis;cellular localization;cellular macromolecule localization;cellular membrane organization;cellular process;cellular protein localization;cellular response to chemical stimulus;cellular response to endogenous stimulus;cellular response to hormone stimulus;cellular response to insulin stimulus;cellular response to organic …	enzyme regulator activity;GTPase regulator activity;guanyl-nucleotide exchange factor activity;nucleoside-triphosphatase regulator activity;Rab guanyl-nucleotide exchange factor activity;Ras guanyl-nucleotide exchange factor activity;small GTPase regulator activity	cell part;cytoplasmic membrane-bounded vesicle;cytoplasmic part;cytoplasmic vesicle;cytoplasmic vesicle membrane;cytoplasmic vesicle part;cytosol;insulin-responsive compartment;intracellular membrane-bounded organelle;intracellular organelle;intracellular organelle part;intracellular part;macromolecular complex;membrane;membrane part;membrane-bounded organelle;membrane-bounded vesicle;organelle;o…		Alternativesplicing;Cellmembrane;Completeproteome;Cytoplasm;Cytoplasmicvesicle;Guanine-nucleotidereleasingfactor;Membrane;Phosphoprotein;Proteintransport;Referenceproteome;Transport
Q9CWU6;A6PWX7;F6V305;A6PWX9	Q9CWU6;A6PWX7;F6V305;A6PWX9	Ubiquinol-cytochrome-c reductase complex assembly factor 1	Uqcc1	NaN	NaN	NaN	NaN	NaN	NaN	23.5276	NaN	NaN	NaN		0	0.950022	NaN	1	1	1	3.1	3.1	3.1	34.299	0.00050684	1.9823	50312000	1			cell part;cytoplasmic membrane-bounded vesicle;cytoplasmic part;cytoplasmic vesicle;intracellular membrane-bounded organelle;intracellular organelle;intracellular part;membrane-bounded organelle;membrane-bounded vesicle;mitochondrion;organelle;vesicle		Alternativesplicing;Completeproteome;Cytoplasmicvesicle;Referenceproteome
A6X919;A6X919-2	A6X919	Probable C-mannosyltransferase DPY19L1	Dpy19l1	NaN	NaN	24.7832	25.3735	NaN	24.3154	NaN	24.5922	24.1619	24.0971		0	0.949604	-0.46776	3	3	3	5.8	5.8	5.8	84.186	0	3.726	1046800000	26		catalytic activity;transferase activity;transferase activity, transferring glycosyl groups	cell part;integral to membrane;intrinsic to membrane;membrane part		Alternativesplicing;Completeproteome;Glycosyltransferase;Membrane;Referenceproteome;Transferase;Transmembrane;Transmembranehelix
A8DUK4;E9Q223;P02104	A8DUK4;E9Q223		Hbbt1;Hbb-bs	31.3297	32.9782	32.5666	32.9101	31.8691	31.7916	33.1289	31.2921	34.1675	33.6661		0.0713717	0.8	0.168746	11	11	3	93.2	93.2	23.1	15.748	0	185.23	185510000000	362	biological regulation;negative regulation of biological process;negative regulation of biosynthetic process;negative regulation of cellular biosynthetic process;negative regulation of cellular macromolecule biosynthetic process;negative regulation of cellular metabolic process;negative regulation of cellular process;negative regulation of gene expression;negative regulation of macromolecule biosy…	binding;cation binding;heme binding;ion binding;iron ion binding;metal ion binding;oxygen binding;oxygen transporter activity;substrate-specific transporter activity;tetrapyrrole binding;transition metal ion binding;transporter activity	cell part;cytoplasmic part;cytosolic part;hemoglobin complex;intracellular part;macromolecular complex;protein complex	African trypanosomiasis;Malaria	Completeproteome;Directproteinsequencing;Heme;Iron;Metal-binding;Oxygentransport;Referenceproteome;Transport
A8Y5E9;B2KGA7;Q505B7-2;Q505B7	A8Y5E9;B2KGA7;Q505B7-2;Q505B7	Protein archease	Zbtb8os	23.3712	NaN	NaN	NaN	NaN	NaN	NaN	NaN	NaN	NaN		0	0.949185	NaN	1	1	1	7.4	7.4	7.4	15.677	0.0019743	1.7262	57713000	1					Acetylation;Alternativesplicing;Completeproteome;Referenceproteome
A8Y5G7;O35654	A8Y5G7;O35654	DNA polymerase delta subunit 2	Pold2	NaN	NaN	NaN	NaN	NaN	22.8412	NaN	NaN	NaN	NaN		0	0.948768	NaN	1	1	1	5.8	5.8	5.8	26.355	0.0033589	1.4986	51491000	2	biosynthetic process;cellular biosynthetic process;cellular macromolecule biosynthetic process;cellular macromolecule metabolic process;cellular metabolic process;cellular nitrogen compound metabolic process;cellular process;DNA metabolic process;DNA replication;DNA-dependent DNA replication;macromolecule biosynthetic process;macromolecule metabolic process;metabolic process;nitrogen compound met…	binding;catalytic activity;DNA binding;DNA polymerase activity;DNA-directed DNA polymerase activity;nucleic acid binding;nucleotidyltransferase activity;transferase activity;transferase activity, transferring phosphorus-containing groups	cell part;intracellular membrane-bounded organelle;intracellular organelle;intracellular part;membrane-bounded organelle;nucleus;organelle	Base excision repair;DNA replication;Homologous recombination;Mismatch repair;Nucleotide excision repair;Purine metabolism;Pyrimidine metabolism	Completeproteome;DNA-directedDNApolymerase;DNAreplication;Nucleotidyltransferase;Nucleus;Referenceproteome;Transferase
P63044;B0QZN5	P63044;B0QZN5	Vesicle-associated membrane protein 2	Vamp2	NaN	NaN	NaN	NaN	NaN	NaN	NaN	NaN	NaN	NaN		-4.34294e-08	1	0	4	1	1	45.7	25	25	12.691	0	4.4692	67160000	3	biological regulation;calcium ion-dependent exocytosis;cellular component assembly;cellular component organization;cellular component organization or biogenesis;cellular membrane fusion;cellular membrane organization;cellular process;cellular response to chemical stimulus;cellular response to endogenous stimulus;cellular response to hormone stimulus;cellular response to insulin stimulus;cellular …	binding;calmodulin binding;lipid binding;phospholipid binding;protein binding;SNARE binding;syntaxin binding;syntaxin-1 binding	cell junction;cell part;cell projection;clathrin coated vesicle membrane;coated vesicle membrane;cytoplasmic part;cytoplasmic vesicle membrane;cytoplasmic vesicle part;Golgi apparatus part;integral to membrane;intracellular organelle part;intracellular part;intrinsic to membrane;macromolecular complex;membrane;membrane part;neuron projection;organelle membrane;organelle part;perinuclear region of…	Salivary secretion;SNARE interactions in vesicular transport;Vasopressin-regulated water reabsorption	Acetylation;Celljunction;Coiledcoil;Completeproteome;Cytoplasmicvesicle;Directproteinsequencing;Membrane;Phosphoprotein;Referenceproteome;Synapse;Synaptosome;Transmembrane;Transmembranehelix
H3BJY1;H3BJ78;H3BKF4;H3BIZ8;B0QZP8;O55101	H3BJY1;H3BJ78;H3BKF4;H3BIZ8;B0QZP8;O55101	Synaptogyrin-2	Syngr2;Gm20708	NaN	NaN	NaN	NaN	NaN	NaN	NaN	NaN	24.2674	NaN		-4.34294e-08	1	0	1	1	1	21.7	21.7	21.7	4.6893	0.0076602	1.2332	373100000	8	establishment of localization;establishment of localization in cell;establishment of protein localization;intracellular protein transport;intracellular transport;protein targeting;protein transport;transport		cell part;clathrin-coated vesicle;coated vesicle;cytoplasmic membrane-bounded vesicle;cytoplasmic part;cytoplasmic vesicle;integral to membrane;intracellular membrane-bounded organelle;intracellular organelle;intracellular part;intrinsic to membrane;membrane part;membrane-bounded organelle;membrane-bounded vesicle;organelle;synapse part;synaptic vesicle;vesicle		Acetylation;Completeproteome;Cytoplasmicvesicle;Membrane;Polymorphism;Referenceproteome;Transmembrane;Transmembranehelix
Q99MK9;Q99MK9-2;B0QZV7	Q99MK9;Q99MK9-2;B0QZV7	Ras association domain-containing protein 1	Rassf1	NaN	NaN	NaN	NaN	NaN	NaN	NaN	NaN	NaN	NaN		-4.34294e-08	1	0	1	1	1	2.4	2.4	2.4	38.789	0.0097506	1.1007	546040000	1	biological regulation;cell cycle arrest;cell cycle process;cellular process;cellular response to stimulus;cellular response to stress;intracellular signal transduction;negative regulation of biological process;negative regulation of cell cycle;negative regulation of cell cycle arrest;negative regulation of cell cycle process;negative regulation of cellular process;positive regulation of biologica…	binding;cation binding;ion binding;metal ion binding	cell part;cytoplasm;cytoplasmic part;cytoskeletal part;cytoskeleton;intracellular membrane-bounded organelle;intracellular non-membrane-bounded organelle;intracellular organelle;intracellular organelle part;intracellular part;macromolecular complex;membrane;membrane-bounded organelle;microtubule;microtubule cytoskeleton;microtubule organizing center;non-membrane-bounded organelle;nucleus;organell…	Bladder cancer;Non-small cell lung cancer;Pathways in cancer	Acetylation;Alternativepromoterusage;Cellcycle;Completeproteome;Cytoplasm;Cytoskeleton;Metal-binding;Microtubule;Nucleus;Phosphoprotein;Referenceproteome;Tumorsuppressor;Zinc;Zinc-finger
O09044;B0R030;Q9D3L3;B0R029;E9Q8A1;P60879	O09044;B0R030;Q9D3L3;B0R029;E9Q8A1	Synaptosomal-associated protein 23;Synaptosomal-associated protein	Snap23	26.9624	26.8343	26.864	26.6429	26.6898	26.835	26.8914	26.7841	26.556	26.7846		0.159701	0.830253	-0.0236429	5	5	5	26.2	26.2	26.2	23.261	0	132.93	3807600000	67	biological regulation;cellular process;establishment of localization;establishment of localization in cell;establishment of protein localization;exocytosis;neurotransmitter secretion;neurotransmitter transport;protein transport;regulation of biological quality;regulation of neurotransmitter levels;secretion;secretion by cell;signal release;transport;vesicle-mediated transport	binding;protein binding;SNARE binding;syntaxin binding;syntaxin-1 binding	axon part;axonal growth cone;azurophil granule;BLOC complex;BLOC-1 complex;cell junction;cell part;cell projection;cell projection part;cytoplasmic membrane-bounded vesicle;cytoplasmic part;cytoplasmic vesicle;cytosolic part;Golgi apparatus;Golgi apparatus part;growth cone;intracellular membrane-bounded organelle;intracellular organelle;intracellular organelle part;intracellular part;lysosome;lyt…	SNARE interactions in vesicular transport	3D-structure;Acetylation;Alternativesplicing;Celljunction;Cellmembrane;Coiledcoil;Completeproteome;Cytoplasm;Directproteinsequencing;Lipoprotein;Membrane;Palmitate;Phosphoprotein;Proteintransport;Referenceproteome;Repeat;Synapse;Synaptosome;Transport
P61022;B0R091;B0R092	P61022;B0R091	Calcineurin B homologous protein 1	Chp1	26.7718	26.5815	26.8514	26.8769	26.7367	26.6409	26.7613	26.8663	26.797	26.9153		0.105804	0.826415	-0.0338058	5	5	5	29.7	29.7	29.7	22.432	0	30.83	3618100000	79	biological regulation;calcium ion-dependent exocytosis;cation homeostasis;cellular cation homeostasis;cellular chemical homeostasis;cellular component assembly;cellular component organization;cellular component organization at cellular level;cellular component organization or biogenesis;cellular component organization or biogenesis at cellular level;cellular homeostasis;cellular ion homeostasis;c…	binding;calcium ion binding;calcium-dependent protein binding;cation binding;cytoskeletal protein binding;enzyme binding;enzyme inhibitor activity;enzyme regulator activity;ion binding;kinase binding;kinase inhibitor activity;kinase regulator activity;metal ion binding;microtubule binding;protein binding;protein kinase inhibitor activity;protein kinase regulator activity;transporter activity;tubu…	cell part;cytoplasmic membrane-bounded vesicle;cytoplasmic part;cytoplasmic vesicle;cytoskeleton;cytosol;endoplasmic reticulum;endoplasmic reticulum-Golgi intermediate compartment;Golgi apparatus part;Golgi membrane;intracellular membrane-bounded organelle;intracellular non-membrane-bounded organelle;intracellular organelle;intracellular organelle part;intracellular part;membrane;membrane-bounded…	Alzheimer's disease;Amyotrophic lateral sclerosis (ALS);Apoptosis;Axon guidance;B cell receptor signaling pathway;Calcium signaling pathway;ko05152;Long-term potentiation;MAPK signaling pathway;Natural killer cell mediated cytotoxicity;Oocyte meiosis;T cell receptor signaling pathway;VEGF signaling pathway;Wnt signaling pathway	Calcium;Cellmembrane;Completeproteome;Cytoplasm;Cytoskeleton;Endoplasmicreticulum;Lipoprotein;Membrane;Metal-binding;Myristate;Nucleus;Phosphoprotein;Proteinkinaseinhibitor;Proteintransport;Referenceproteome;Repeat;Transport
P70349;B0R1E3	P70349;B0R1E3	Histidine triad nucleotide-binding protein 1	Hint1	NaN	NaN	NaN	NaN	28.5378	27.7505	26.7897	NaN	NaN	NaN		0	0.94835	NaN	3	3	3	32.5	32.5	32.5	13.777	0	15.604	11164000000	38	biological regulation;biosynthetic process;catabolic process;cellular biosynthetic process;cellular catabolic process;cellular macromolecule biosynthetic process;cellular macromolecule metabolic process;cellular metabolic process;cellular nitrogen compound catabolic process;cellular nitrogen compound metabolic process;cellular process;cellular response to stimulus;heterocycle catabolic process;he…	binding;catalytic activity;hydrolase activity;nucleotide binding	cell part;chromatin remodeling complex;cytoplasm;histone deacetylase complex;intracellular membrane-bounded organelle;intracellular organelle;intracellular organelle part;intracellular part;macromolecular complex;membrane;membrane-bounded organelle;nuclear part;nucleoplasm part;nucleus;organelle;organelle part;plasma membrane;protein complex		Acetylation;Apoptosis;Completeproteome;Cytoplasm;Directproteinsequencing;Hydrolase;Nucleotide-binding;Nucleus;Referenceproteome;Transcription;Transcriptionregulation
Q64008;Q0PD20;B1AQD4;F7BE32;B1AQD3	Q64008;Q0PD20;B1AQD4;F7BE32;B1AQD3	Ras-related protein Rab-34	Rab34	NaN	NaN	NaN	NaN	NaN	25.5514	26.5942	NaN	NaN	NaN		0	0.947933	NaN	4	4	4	18.5	18.5	18.5	29.1	0	3.7557	2967100000	10	biological regulation;cellular component organization;cellular component organization at cellular level;cellular component organization or biogenesis;cellular component organization or biogenesis at cellular level;cellular membrane organization;cellular process;cellular response to stimulus;endocytosis;establishment of localization;establishment of protein localization;intracellular signal transd…	binding;catalytic activity;GTP binding;GTPase activity;guanyl nucleotide binding;guanyl ribonucleotide binding;hydrolase activity;hydrolase activity, acting on acid anhydrides;hydrolase activity, acting on acid anhydrides, in phosphorus-containing anhydrides;nucleoside-triphosphatase activity;nucleotide binding;purine nucleotide binding;purine ribonucleoside triphosphate binding;purine ribonucleo…	cell part;cell projection;cytoplasmic membrane-bounded vesicle;cytoplasmic part;cytoplasmic vesicle;cytoplasmic vesicle membrane;cytoplasmic vesicle part;early endosome;endocytic vesicle;endocytic vesicle membrane;endosome;Golgi apparatus;intracellular membrane-bounded organelle;intracellular organelle;intracellular organelle part;intracellular part;membrane;membrane-bounded organelle;membrane-bo…		Completeproteome;Cytoplasm;Cytoplasmicvesicle;Golgiapparatus;GTP-binding;Lipoprotein;Membrane;Nucleotide-binding;Phosphoprotein;Prenylation;Proteintransport;Referenceproteome;Transport
Q9D7X3;B1AQF4;H3BKL8;Q3V2Y9;H3BKD1	Q9D7X3;B1AQF4;H3BKL8;Q3V2Y9;H3BKD1	Dual specificity protein phosphatase 3	Dusp3	27.8172	27.8015	27.5154	27.8011	27.3498	27.1896	27.7719	27.4819	27.5156	27.4191		0.370182	0.369879	-0.230602	4	4	4	26.5	26.5	26.5	20.472	0	323.31	6476900000	94	biological regulation;cellular macromolecule metabolic process;cellular metabolic process;cellular process;cellular protein metabolic process;dephosphorylation;macromolecule metabolic process;macromolecule modification;metabolic process;negative regulation of antigen receptor-mediated signaling pathway;negative regulation of biological process;negative regulation of cell activation;negative regul…	catalytic activity;hydrolase activity;hydrolase activity, acting on ester bonds;MAP kinase phosphatase activity;phosphatase activity;phosphoprotein phosphatase activity;phosphoric ester hydrolase activity;protein tyrosine phosphatase activity;protein tyrosine/serine/threonine phosphatase activity	cell part;cytoplasmic part;cytosol;immunological synapse;intracellular organelle part;intracellular part;membrane part;nuclear part;nucleoplasm;organelle part;plasma membrane part	MAPK signaling pathway	Completeproteome;Directproteinsequencing;Hydrolase;Nucleus;Proteinphosphatase;Referenceproteome
O08573;B1AQR8;G3X9T7;O08573-2	O08573;B1AQR8;G3X9T7;O08573-2	Galectin-9;Galectin	Lgals9	NaN	NaN	NaN	NaN	NaN	25.4603	25.5598	25.7577	NaN	NaN		0	0.947516	NaN	6	6	6	18.1	18.1	18.1	40.035	0	28.319	2490300000	27	biological adhesion;cell adhesion;cell-cell adhesion;cellular process;heterophilic cell-cell adhesion	binding;carbohydrate binding;galactoside binding;monosaccharide binding;sugar binding	cell part;cytoplasm;extracellular region;intracellular part		3D-structure;Alternativesplicing;Completeproteome;Cytoplasm;Lectin;Referenceproteome;Repeat;Secreted
Q8CHH9;B1AQZ0;B7ZC46;B1AQY9;Q8CHH9-2;E0CYM4	Q8CHH9;B1AQZ0;B7ZC46;B1AQY9;Q8CHH9-2	Septin-8	2008-09-01	29.729	29.4507	29.4631	29.5702	29.5274	29.4034	29.5108	29.4519	29.4215	29.4847		0.28582	0.575627	-0.0904903	8	7	7	25.2	20.7	20.7	49.812	0	323.31	23870000000	146	cell cycle;cellular process	binding;GTP binding;guanyl nucleotide binding;guanyl ribonucleotide binding;nucleotide binding;purine nucleotide binding;purine ribonucleoside triphosphate binding;purine ribonucleotide binding;ribonucleotide binding	cell cortex part;cell part;cytoplasm;cytoplasmic part;cytoskeletal part;intracellular organelle part;intracellular part;macromolecular complex;organelle part;protein complex;septin complex		Acetylation;Alternativesplicing;Coiledcoil;Completeproteome;Cytoplasm;Cytoskeleton;Directproteinsequencing;GTP-binding;Nucleotide-binding;Phosphoprotein;Referenceproteome
P28741;Q3TET1;Q3UI47;B1AQZ2;P33174;E9PX57;F6V6Z9;B1AQZ5	P28741;Q3TET1;Q3UI47;B1AQZ2	Kinesin-like protein KIF3A;Kinesin-like protein	Kif3a	NaN	NaN	NaN	NaN	NaN	NaN	NaN	NaN	NaN	NaN		-4.34294e-08	1	0	4	4	4	7.7	7.7	7.7	80.169	0	12.022	334130000	4	anatomical structure development;anatomical structure formation involved in morphogenesis;anterior/posterior pattern specification;biological regulation;cell projection assembly;cell projection organization;cell surface receptor linked signaling pathway;cellular component assembly;cellular component assembly at cellular level;cellular component assembly involved in morphogenesis;cellular componen…	adenyl nucleotide binding;adenyl ribonucleotide binding;ATP binding;binding;catalytic activity;cytoskeletal protein binding;DNA binding;hydrolase activity;hydrolase activity, acting on acid anhydrides;hydrolase activity, acting on acid anhydrides, in phosphorus-containing anhydrides;microtubule binding;microtubule motor activity;motor activity;nucleic acid binding;nucleoside-triphosphatase activi…	cell part;cell projection;centrosome;chromosome;cilium;cytoplasmic part;cytoskeletal part;cytosol;intracellular membrane-bounded organelle;intracellular non-membrane-bounded organelle;intracellular organelle;intracellular organelle part;intracellular part;kinesin complex;kinesin II complex;macromolecular complex;membrane-bounded organelle;microtubule;microtubule associated complex;microtubule org…		3D-structure;ATP-binding;Cellprojection;Chromosome;Cilium;Ciliumbiogenesis/degradation;Coiledcoil;Completeproteome;Cytoplasm;Cytoskeleton;DNA-binding;Microtubule;Motorprotein;Nucleotide-binding;Nucleus;Phosphoprotein;Referenceproteome
B1AR69;M0QWL0	B1AR69		Myh13	NaN	NaN	NaN	NaN	NaN	NaN	NaN	NaN	28.9357	NaN		-4.34294e-08	1	0	28	1	1	15.1	1.2	1.2	223.56	0.0012481	1.8261	32334000000	10	cell communication;cellular process;cellular response to external stimulus;cellular response to extracellular stimulus;cellular response to nutrient levels;cellular response to starvation;cellular response to stimulus;cellular response to stress;response to external stimulus;response to extracellular stimulus;response to nutrient levels;response to starvation;response to stimulus;response to stre…	adenyl nucleotide binding;adenyl ribonucleotide binding;ATP binding;binding;catalytic activity;hydrolase activity;hydrolase activity, acting on acid anhydrides;hydrolase activity, acting on acid anhydrides, in phosphorus-containing anhydrides;motor activity;nucleoside-triphosphatase activity;nucleotide binding;purine nucleotide binding;purine ribonucleoside triphosphate binding;purine ribonucleot…	cell part;contractile fiber;cytoplasmic part;cytoskeletal part;intracellular non-membrane-bounded organelle;intracellular organelle;intracellular organelle part;intracellular part;macromolecular complex;myofibril;myosin complex;non-membrane-bounded organelle;organelle;organelle part;protein complex	Tight junction;Viral myocarditis	Actin-binding;ATP-binding;Coiledcoil;Completeproteome;Motorprotein;Myosin;Nucleotide-binding;Referenceproteome
P61255;B1ARA3;B1ARA5	P61255;B1ARA3;B1ARA5	60S ribosomal protein L26	Rpl26	28.8674	28.7715	28.9049	28.8902	28.9589	29.635	29.2069	29.262	29.1626	28.9536	+	1.37805	0.0272952	0.573027	6	6	6	33.1	33.1	33.1	17.258	0	89.193	27610000000	98	biosynthetic process;cellular biosynthetic process;cellular component biogenesis;cellular component biogenesis at cellular level;cellular component organization or biogenesis;cellular component organization or biogenesis at cellular level;cellular macromolecule biosynthetic process;cellular macromolecule metabolic process;cellular metabolic process;cellular nitrogen compound metabolic process;cel…	structural constituent of ribosome;structural molecule activity	cell part;cytosolic large ribosomal subunit;intracellular organelle part;intracellular part;large ribosomal subunit;macromolecular complex;organelle part;ribonucleoprotein complex	Ribosome	Completeproteome;Phosphoprotein;Referenceproteome;Ribonucleoprotein;Ribosomalprotein
Q9QXZ0;E9QA63;B1ARU4;E9PVY8;F7ACR9;Q9QXZ0-4;A0A0A0MQA6;E9QNP1;Q9QXZ0-3;Q9QXZ0-2;B1ARU1;F6Q750;F6XCT0;F6SHS0;F6YKN8;F6RL59;A0A0A0MQH5;F6RCJ3	Q9QXZ0;E9QA63;B1ARU4;E9PVY8;F7ACR9;Q9QXZ0-4;A0A0A0MQA6;E9QNP1;Q9QXZ0-3;Q9QXZ0-2;B1ARU1;F6Q750	Microtubule-actin cross-linking factor 1	Macf1	31.427	31.2825	NaN	NaN	NaN	31.227	31.4782	NaN	32.2786	30.9639		0.00453679	0.969345	-0.00212955	16	15	15	2.8	2.7	2.7	831.87	0	17.053	67887000000	26	anatomical structure formation involved in morphogenesis;biological regulation;cell cycle arrest;cell cycle process;cell surface receptor linked signaling pathway;cellular component movement;cellular process;cellular response to stimulus;developmental process;establishment of localization;establishment of localization in cell;establishment of protein localization;establishment of protein localiza…	actin binding;ATPase activity;binding;calcium ion binding;catalytic activity;cation binding;cytoskeletal protein binding;hydrolase activity;hydrolase activity, acting on acid anhydrides;hydrolase activity, acting on acid anhydrides, in phosphorus-containing anhydrides;ion binding;metal ion binding;microtubule binding;nucleoside-triphosphatase activity;protein binding;pyrophosphatase activity;tubu…	actin cytoskeleton;cell part;cell projection membrane;cell projection part;cytoplasmic part;cytoskeletal part;cytoskeleton;Golgi apparatus;intracellular membrane-bounded organelle;intracellular non-membrane-bounded organelle;intracellular organelle;intracellular organelle part;intracellular part;leading edge membrane;macromolecular complex;membrane part;membrane-bounded organelle;microtubule;micr…		Acetylation;Actin-binding;Alternativesplicing;Calcium;Cellmembrane;Cellprojection;Completeproteome;Cytoplasm;Cytoskeleton;Directproteinsequencing;Golgiapparatus;Leucine-richrepeat;Membrane;Metal-binding;Microtubule;Phosphoprotein;Referenceproteome;Repeat;SH3domain;Wntsignalingpathway
Q9D032;Q9CYZ8;Q9CYZ8-2;B1AS34;Q3U4B1;B1AS37;Q9D032-2	Q9D032;Q9CYZ8;Q9CYZ8-2;B1AS34;Q3U4B1;B1AS37;Q9D032-2	Single-stranded DNA-binding protein 3;Single-stranded DNA-binding protein 2	Ssbp3;Ssbp2;Ssbp4	NaN	NaN	NaN	NaN	NaN	NaN	NaN	NaN	NaN	NaN		-4.34294e-08	1	0	1	1	1	2.6	2.6	2.6	40.421	0.0019637	1.6864	392560000	7	anatomical structure formation involved in morphogenesis;anatomical structure morphogenesis;biological regulation;biosynthetic process;cellular biosynthetic process;cellular component assembly;cellular component organization;cellular component organization or biogenesis;cellular macromolecule biosynthetic process;cellular macromolecule metabolic process;cellular metabolic process;cellular nitroge…	binding;DNA binding;nucleic acid binding;single-stranded DNA binding;structure-specific DNA binding	cell part;cytoplasm;intracellular membrane-bounded organelle;intracellular organelle;intracellular part;macromolecular complex;membrane-bounded organelle;nucleus;organelle;protein complex		Alternativesplicing;Completeproteome;DNA-binding;Nucleus;Phosphoprotein;Referenceproteome;Transcription;Transcriptionregulation
P52332;B1ASP2;Q9R117;E9QJS1	P52332;B1ASP2	Tyrosine-protein kinase JAK1;Tyrosine-protein kinase	Jak1	NaN	25.0152	NaN	NaN	24.967	24.8313	25.1381	25.1474	25.6352	NaN		0	0.9471	-0.0304642	4	4	4	3.6	3.6	3.6	133.37	0	17.626	1556900000	17	biological regulation;cell surface receptor linked signaling pathway;cellular macromolecule metabolic process;cellular metabolic process;cellular process;cellular protein metabolic process;cellular response to chemical stimulus;cellular response to cytokine stimulus;cellular response to organic substance;cellular response to stimulus;cytokine-mediated signaling pathway;enzyme linked receptor prot…	adenyl nucleotide binding;adenyl ribonucleotide binding;ATP binding;binding;catalytic activity;kinase activity;non-membrane spanning protein tyrosine kinase activity;nucleotide binding;phosphotransferase activity, alcohol group as acceptor;protein kinase activity;protein tyrosine kinase activity;purine nucleotide binding;purine ribonucleoside triphosphate binding;purine ribonucleotide binding;rib…	cell part;cytoplasm;cytoplasmic part;cytoskeleton;cytosol;endomembrane system;intracellular membrane-bounded organelle;intracellular non-membrane-bounded organelle;intracellular organelle;intracellular part;membrane;membrane-bounded organelle;non-membrane-bounded organelle;nucleus;organelle	Hepatitis C;Jak-STAT signaling pathway;ko05152;Leishmaniasis;Measles;Osteoclast differentiation;Pancreatic cancer;Pathways in cancer;Toxoplasmosis	3D-structure;Acetylation;ATP-binding;Completeproteome;Directproteinsequencing;Kinase;Membrane;Nucleotide-binding;Phosphoprotein;Referenceproteome;Repeat;SH2domain;Transferase;Tyrosine-proteinkinase
Q5NCF2;B1ASW5;B1ASW6	Q5NCF2;B1ASW5;B1ASW6	Trafficking protein particle complex subunit 1	Trappc1	NaN	NaN	NaN	NaN	NaN	24.4874	NaN	NaN	NaN	NaN		0	0.946684	NaN	2	2	2	12.4	12.4	12.4	16.881	0.0019685	1.7022	648430000	7	cellular process;ER to Golgi vesicle-mediated transport;establishment of localization;establishment of localization in cell;Golgi vesicle transport;intracellular transport;transport;vesicle-mediated transport		cell part;cis-Golgi network;cytoplasmic part;endoplasmic reticulum;Golgi apparatus;Golgi apparatus part;intracellular membrane-bounded organelle;intracellular organelle;intracellular organelle part;intracellular part;macromolecular complex;membrane-bounded organelle;organelle;organelle part;protein complex;TRAPP complex		3D-structure;Completeproteome;Endoplasmicreticulum;ER-Golgitransport;Golgiapparatus;Referenceproteome;Transport
Q64516;B1ASZ3;Q64516-1;Q64516-2;Q8C635;Q9WU65	Q64516;B1ASZ3;Q64516-1;Q64516-2	Glycerol kinase	Gk;Gyk	25.7804	25.9169	NaN	25.734	NaN	25.6022	25.5688	NaN	NaN	25.7303		1.19104	0.10451	-0.263165	6	6	6	12.3	12.3	12.3	61.227	0	7.1602	1105800000	19	acylglycerol metabolic process;alcohol biosynthetic process;alcohol catabolic process;alcohol metabolic process;alditol biosynthetic process;alditol catabolic process;alditol metabolic process;biosynthetic process;carbohydrate biosynthetic process;carbohydrate catabolic process;carbohydrate metabolic process;catabolic process;cellular biosynthetic process;cellular carbohydrate biosynthetic proces…	adenyl nucleotide binding;adenyl ribonucleotide binding;ATP binding;binding;catalytic activity;glycerol kinase activity;kinase activity;nucleotide binding;phosphotransferase activity, alcohol group as acceptor;purine nucleotide binding;purine ribonucleoside triphosphate binding;purine ribonucleotide binding;ribonucleotide binding;transferase activity;transferase activity, transferring phosphorus-…	cell part;cytoplasmic part;intracellular membrane-bounded organelle;intracellular organelle;intracellular organelle part;intracellular part;membrane;membrane-bounded organelle;mitochondrial membrane;mitochondrial outer membrane;mitochondrial part;mitochondrion;organelle;organelle membrane;organelle outer membrane;organelle part;outer membrane	Glycerolipid metabolism;Plant-pathogen interaction;PPAR signaling pathway	Alternativesplicing;ATP-binding;Completeproteome;Cytoplasm;Glycerolmetabolism;Kinase;Membrane;Mitochondrion;Mitochondrionoutermembrane;Nucleotide-binding;Referenceproteome;Transferase
Q920Q6;B1AT10;Q920Q6-3;Q920Q6-2;B1AT13	Q920Q6;B1AT10;Q920Q6-3;Q920Q6-2;B1AT13	RNA-binding protein Musashi homolog 2	Msi2	NaN	NaN	NaN	NaN	NaN	NaN	NaN	NaN	NaN	NaN		-4.34294e-08	1	0	2	2	2	9	9	9	36.938	0	5.8478	232220000	5	anatomical structure development;cell development;cellular developmental process;cellular process;developmental process;stem cell development	binding;nucleic acid binding;nucleotide binding;poly(U) RNA binding;poly-pyrimidine tract binding;RNA binding;single-stranded RNA binding	cell part;cytoplasm;intracellular part;macromolecular complex;polysome;ribonucleoprotein complex	mRNA surveillance pathway	Acetylation;Alternativesplicing;Completeproteome;Cytoplasm;Phosphoprotein;Referenceproteome;Repeat;RNA-binding
Q9D0M1;B1AT82;B1AT84;B1AT83	Q9D0M1;B1AT82	Phosphoribosyl pyrophosphate synthase-associated protein 1	Prpsap1	NaN	27.9585	27.8294	27.6355	27.7252	28.0925	27.9589	27.8466	27.8902	27.0685		0.534965	0.378045	0.131795	5	5	4	19.1	19.1	15.2	39.431	0	7.3428	7159800000	34	biological regulation;biosynthetic process;cellular biosynthetic process;cellular metabolic process;cellular nitrogen compound biosynthetic process;cellular nitrogen compound metabolic process;cellular process;metabolic process;negative regulation of catalytic activity;negative regulation of kinase activity;negative regulation of molecular function;negative regulation of transferase activity;nitr…	binding;catalytic activity;cation binding;diphosphotransferase activity;enzyme regulator activity;ion binding;magnesium ion binding;metal ion binding;ribose phosphate diphosphokinase activity;transferase activity;transferase activity, transferring phosphorus-containing groups	macromolecular complex;protein complex;ribose phosphate diphosphokinase complex		Acetylation;Completeproteome;Nucleotidebiosynthesis;Phosphoprotein;Referenceproteome
Q60631;B1AT92;Q60631-2;B1AT95	Q60631;B1AT92;Q60631-2	Growth factor receptor-bound protein 2	Grb2	26.6528	26.3361	26.4199	26.5278	26.2402	26.7031	26.2774	26.4656	26.2457	26.3507		0.0340934	0.921003	0.0206223	5	5	5	21.7	21.7	21.7	25.238	0	3.7363	2491600000	30	aging;anatomical structure formation involved in morphogenesis;anatomical structure morphogenesis;biological regulation;branching involved in embryonic placenta morphogenesis;cell differentiation;cell surface receptor linked signaling pathway;cellular component assembly;cellular component organization;cellular component organization or biogenesis;cellular developmental process;cellular macromolec…	binding;binding, bridging;protein binding;protein binding, bridging;protein domain specific binding;SH3 domain binding;SH3/SH2 adaptor activity;signaling adaptor activity	cell part;cytoplasm;cytoplasmic part;cytosol;endosome;Golgi apparatus;Grb2-EGFR complex;intracellular membrane-bounded organelle;intracellular organelle;intracellular organelle part;intracellular part;macromolecular complex;membrane;membrane part;membrane-bounded organelle;nuclear part;nucleus;organelle;organelle membrane;organelle part;plasma membrane;plasma membrane part;protein complex;signalo…	Acute myeloid leukemia;B cell receptor signaling pathway;Chemokine signaling pathway;Chronic myeloid leukemia;Dorso-ventral axis formation;Endometrial cancer;ErbB signaling pathway;Fc epsilon RI signaling pathway;Focal adhesion;Gap junction;Glioma;GnRH signaling pathway;Hepatitis C;Insulin signaling pathway;Jak-STAT signaling pathway;MAPK signaling pathway;MAPK signaling pathway - fly;Natural kil…	3D-structure;Acetylation;Alternativesplicing;Completeproteome;Cytoplasm;Directproteinsequencing;Endosome;Golgiapparatus;Nucleus;Phosphoprotein;Referenceproteome;Repeat;SH2domain;SH3domain
P47740;B1AV77;B1ATI0	P47740;B1AV77;B1ATI0	Fatty aldehyde dehydrogenase;Aldehyde dehydrogenase	Aldh3a2	28.4115	28.4193	28.5339	28.5231	28.4478	27.8468	28.3125	27.9146	28.2012	28.2844		0.887082	0.10873	-0.375232	7	7	6	17.4	17.4	14.9	53.97	0	145.11	10979000000	134	alcohol metabolic process;anatomical structure development;cellular aldehyde metabolic process;cellular lipid metabolic process;cellular metabolic process;cellular process;central nervous system development;developmental process;epidermis development;isoprenoid metabolic process;lipid metabolic process;metabolic process;peripheral nervous system development;phytol metabolic process;primary metabo…	aldehyde dehydrogenase [NAD(P)+] activity;catalytic activity;long-chain-alcohol oxidase activity;long-chain-aldehyde dehydrogenase activity;oxidoreductase activity;oxidoreductase activity, acting on CH-OH group of donors;oxidoreductase activity, acting on the aldehyde or oxo group of donors;oxidoreductase activity, acting on the aldehyde or oxo group of donors, NAD or NADP as acceptor;oxidoreduct…	cell part;cytoplasmic part;endoplasmic reticulum;endoplasmic reticulum membrane;endoplasmic reticulum part;integral to membrane;intracellular membrane-bounded organelle;intracellular organelle;intracellular organelle part;intracellular part;intrinsic to membrane;membrane;membrane part;membrane-bounded organelle;microbody;mitochondrial inner membrane;mitochondrial membrane;mitochondrial part;organ…	Arginine and proline metabolism;Ascorbate and aldarate metabolism;beta-Alanine metabolism;Chloroalkane and chloroalkene degradation;Fatty acid metabolism;Glycerolipid metabolism;Glycolysis / Gluconeogenesis;Histidine metabolism;Limonene and pinene degradation;Lysine degradation;Pentose and glucuronate interconversions;Propanoate metabolism;Pyruvate metabolism;Tryptophan metabolism;Valine, leucine…	Completeproteome;Endoplasmicreticulum;Membrane;NAD;Oxidoreductase;Referenceproteome;Transmembrane;Transmembranehelix
Q60780;B1ATI9;Q3U432;Q60780-2	Q60780;B1ATI9;Q3U432;Q60780-2	Growth arrest-specific protein 7	Gas7	NaN	NaN	NaN	NaN	NaN	24.4142	NaN	NaN	NaN	NaN		0	0.946269	NaN	3	3	3	7.8	7.8	7.8	48.173	0	239.58	1029300000	21	actin cytoskeleton organization;actin filament bundle assembly;actin filament organization;actin filament polymerization;actin filament-based process;actin polymerization or depolymerization;anatomical structure morphogenesis;biological regulation;cell part morphogenesis;cell projection morphogenesis;cell projection organization;cellular component assembly;cellular component assembly at cellular …	actin binding;actin filament binding;binding;cytoskeletal protein binding;protein binding	actin filament;cell part;cell projection;cytoplasm;cytoskeletal part;intracellular organelle part;intracellular part;macromolecular complex;organelle part;protein complex;ruffle		Alternativesplicing;Coiledcoil;Completeproteome;Cytoplasm;Developmentalprotein;Differentiation;Neurogenesis;Phosphoprotein;Referenceproteome
P47809;B1ATL6;M0QWR0;M0QWG5	P47809;B1ATL6	Dual specificity mitogen-activated protein kinase kinase 4	Map2k4	NaN	NaN	NaN	NaN	NaN	25.0153	25.1681	NaN	NaN	NaN		0	0.945853	NaN	3	3	3	10.3	10.3	10.3	44.113	0	6.2565	936740000	8	activation of JUN kinase activity;activation of MAPK activity;apoptosis;biological regulation;cell death;cellular macromolecule metabolic process;cellular metabolic process;cellular process;cellular protein metabolic process;cellular response to abiotic stimulus;cellular response to external stimulus;cellular response to mechanical stimulus;cellular response to stimulus;death;macromolecule metabo…	adenyl nucleotide binding;adenyl ribonucleotide binding;ATP binding;binding;catalytic activity;kinase activity;nucleotide binding;phosphotransferase activity, alcohol group as acceptor;protein kinase activity;protein serine/threonine kinase activity;protein tyrosine kinase activity;purine nucleotide binding;purine ribonucleoside triphosphate binding;purine ribonucleotide binding;ribonucleotide bi…	cell part;cytoplasmic part;cytosol;intracellular membrane-bounded organelle;intracellular organelle;intracellular part;membrane-bounded organelle;nucleus;organelle	Chagas disease (American trypanosomiasis);Epithelial cell signaling in Helicobacter pylori infection;ErbB signaling pathway;Fc epsilon RI signaling pathway;GnRH signaling pathway;MAPK signaling pathway;Toll-like receptor signaling pathway	Acetylation;Apoptosis;ATP-binding;Completeproteome;Cytoplasm;Kinase;Nucleotide-binding;Nucleus;Phosphoprotein;Referenceproteome;Serine/threonine-proteinkinase;Stressresponse;Transferase;Tyrosine-proteinkinase
P57787;B1ATM1;B1ATM2	P57787;B1ATM1;B1ATM2	Monocarboxylate transporter 4	Slc16a3	NaN	NaN	NaN	NaN	NaN	NaN	NaN	NaN	NaN	NaN		-4.34294e-08	1	0	1	1	1	1.7	1.7	1.7	50.373	0.0074609	1.2694	366190000	21	cellular process;establishment of localization;transmembrane transport;transport	active transmembrane transporter activity;carboxylic acid transmembrane transporter activity;monocarboxylic acid transmembrane transporter activity;organic acid transmembrane transporter activity;secondary active monocarboxylate transmembrane transporter activity;secondary active transmembrane transporter activity;substrate-specific transmembrane transporter activity;substrate-specific transporte…	actin cytoskeleton;cell part;cytoskeleton;integral to membrane;intracellular non-membrane-bounded organelle;intracellular organelle;intracellular organelle part;intracellular part;intrinsic to membrane;membrane;membrane part;non-membrane-bounded organelle;nuclear membrane;nuclear part;organelle;organelle membrane;organelle part;plasma membrane		Cellmembrane;Completeproteome;Membrane;Phosphoprotein;Referenceproteome;Symport;Transmembrane;Transmembranehelix;Transport
Q80Y81;B1ATP7;Q80Y81-2	Q80Y81;B1ATP7;Q80Y81-2	Zinc phosphodiesterase ELAC protein 2	Elac2	25.0511	NaN	NaN	24.8952	NaN	24.8838	24.7727	24.6934	NaN	24.8062		0	0.945439	-0.222865	3	3	3	3.6	3.6	3.6	92.718	0.00026831	2.4396	576000000	6	cellular macromolecule metabolic process;cellular metabolic process;cellular nitrogen compound metabolic process;cellular process;macromolecule metabolic process;metabolic process;ncRNA metabolic process;ncRNA processing;nitrogen compound metabolic process;nucleic acid metabolic process;nucleic acid phosphodiester bond hydrolysis;nucleobase-containing compound metabolic process;primary metabolic …	binding;catalytic activity;cation binding;endonuclease activity;hydrolase activity;hydrolase activity, acting on ester bonds;ion binding;metal ion binding;nuclease activity	cell part;cytoplasmic part;intracellular membrane-bounded organelle;intracellular organelle;intracellular part;membrane-bounded organelle;mitochondrion;nucleus;organelle	RNA transport	Alternativesplicing;Completeproteome;Endonuclease;Hydrolase;Metal-binding;Nuclease;Nucleus;Phosphoprotein;Referenceproteome;tRNAprocessing;Zinc
Q64518;B1ATS5;B1ATS4;E9Q559;Q64518-2;Q64518-3	Q64518;B1ATS5;B1ATS4;E9Q559;Q64518-2;Q64518-3	Sarcoplasmic/endoplasmic reticulum calcium ATPase 3;Calcium-transporting ATPase	Atp2a3	29.4174	28.3717	28.8404	28.3603	28.4851	28.8739	28.2711	28.4067	28.2147	29.013		0.261137	0.44765	-0.303983	17	10	10	19.8	11.5	11.5	113.64	0	18.22	4754500000	57		active transmembrane transporter activity;adenyl nucleotide binding;adenyl ribonucleotide binding;ATP binding;ATPase activity;ATPase activity, coupled;ATPase activity, coupled to movement of substances;ATPase activity, coupled to transmembrane movement of ions;ATPase activity, coupled to transmembrane movement of ions, phosphorylative mechanism;ATPase activity, coupled to transmembrane movement o…	cell part;cytoplasmic part;endoplasmic reticulum;endoplasmic reticulum membrane;endoplasmic reticulum part;integral to membrane;intracellular membrane-bounded organelle;intracellular organelle;intracellular organelle part;intracellular part;intrinsic to membrane;membrane;membrane part;membrane-bounded organelle;nuclear membrane;nuclear part;organelle;organelle membrane;organelle part;sarcoplasmic…	Alzheimer's disease;Calcium signaling pathway;Pancreatic secretion	Acetylation;Alternativesplicing;ATP-binding;Calcium;Calciumtransport;Completeproteome;Endoplasmicreticulum;Hydrolase;Iontransport;Magnesium;Membrane;Metal-binding;Nucleotide-binding;Nucleus;Phosphoprotein;Referenceproteome;Sarcoplasmicreticulum;Transmembrane;Transmembranehelix;Transport
Q99LI8;B1ATZ0;B1ATZ1;Q3UMA3;B1ATY9;F6VV02	Q99LI8;B1ATZ0;B1ATZ1;Q3UMA3	Hepatocyte growth factor-regulated tyrosine kinase substrate	Hgs	26.2483	25.9156	26.1792	26.2438	NaN	26.0037	25.9569	26.2328	26.318	25.8808		0.415047	0.429915	-0.134071	5	5	5	6.2	6.2	6.2	86.014	0	7.8116	2679300000	42	biological regulation;cellular process;endosome to lysosome transport;endosome transport;establishment of localization;establishment of localization in cell;establishment of protein localization;intracellular protein transport;intracellular transport;lysosomal transport;negative regulation of biological process;negative regulation of cell communication;negative regulation of cellular process;nega…	binding;cation binding;ion binding;metal ion binding	cell part;cytoplasm;cytoplasmic membrane-bounded vesicle;cytoplasmic part;cytoplasmic vesicle;cytosol;early endosome;early endosome membrane;endosomal part;endosome;endosome membrane;intracellular membrane-bounded organelle;intracellular organelle;intracellular organelle part;intracellular part;late endosome membrane;membrane;membrane-bounded organelle;membrane-bounded vesicle;multivesicular body…	Endocytosis;Phagosome	Acetylation;Completeproteome;Cytoplasm;Endosome;Membrane;Metal-binding;Phosphoprotein;Proteintransport;Referenceproteome;Transport;Ublconjugation;Zinc;Zinc-finger
Q9Z0X1;B1AU25	Q9Z0X1;B1AU25	Apoptosis-inducing factor 1, mitochondrial	Aifm1	29.1828	29.1374	29.1539	28.7467	28.9214	28.872	28.9488	28.838	28.8642	28.9795	+	2.29561	0.045274	-0.247665	15	15	14	29.4	29.4	27.6	66.765	0	127.86	13616000000	194	activation of caspase activity;apoptosis;apoptosis in response to endoplasmic reticulum stress;apoptotic mitochondrial changes;biological regulation;catabolic process;cell death;cell differentiation;cell redox homeostasis;cellular catabolic process;cellular component assembly;cellular component assembly at cellular level;cellular component biogenesis;cellular component organization;cellular compo…	binding;catalytic activity;coenzyme binding;cofactor binding;DNA binding;electron-transferring-flavoprotein dehydrogenase activity;flavin adenine dinucleotide binding;nucleic acid binding;oxidoreductase activity;oxidoreductase activity, acting on the CH-NH group of donors;oxidoreductase activity, acting on the CH-NH group of donors, quinone or similar compound as acceptor	cell part;cytoplasmic part;cytosol;intracellular membrane-bounded organelle;intracellular organelle;intracellular organelle part;intracellular part;membrane;membrane-bounded organelle;membrane-enclosed lumen;mitochondrial inner membrane;mitochondrial intermembrane space;mitochondrial membrane;mitochondrial outer membrane;mitochondrial part;nucleus;organelle;organelle envelope lumen;organelle inne…	Apoptosis	3D-structure;Acetylation;Apoptosis;Completeproteome;Cytoplasm;Directproteinsequencing;DNA-binding;FAD;Flavoprotein;Isopeptidebond;Membrane;Mitochondrion;Mitochondrioninnermembrane;NAD;Nucleus;Oxidoreductase;Phosphoprotein;Referenceproteome;Transitpeptide;Ublconjugation
Q9CWP6;B1AU74;Q9CWP6-4;Q9CWP6-2;Q9CWP6-3	Q9CWP6;B1AU74;Q9CWP6-4;Q9CWP6-2;Q9CWP6-3	Motile sperm domain-containing protein 2	Mospd2	NaN	NaN	NaN	NaN	NaN	NaN	NaN	NaN	NaN	NaN		-4.34294e-08	1	0	2	2	2	4.4	4.4	4.4	59.854	0	3.165	509860000	2		structural molecule activity	cell part;integral to membrane;intrinsic to membrane;membrane part		3D-structure;Alternativesplicing;Completeproteome;Membrane;Polymorphism;Referenceproteome;Transmembrane;Transmembranehelix
Q99MD9;B1AU75;B1AU76;Q99MD9-2	Q99MD9;B1AU75;B1AU76;Q99MD9-2	Nuclear autoantigenic sperm protein	Nasp	27.034	26.9705	27.4592	27.1376	26.974	28.438	27.856	27.8316	27.5011	27.4685	+	1.36517	0.0200506	0.992415	9	9	9	13.5	13.5	13.5	83.953	0	15.43	5785800000	66	anatomical structure development;ATP-dependent chromatin remodeling;biosynthetic process;blastocyst development;cell cycle;cell proliferation;cellular biosynthetic process;cellular component organization;cellular component organization at cellular level;cellular component organization or biogenesis;cellular component organization or biogenesis at cellular level;cellular macromolecular complex sub…	binding;heat shock protein binding;histone binding;Hsp90 protein binding;protein binding	cell part;cytoplasm;intracellular membrane-bounded organelle;intracellular organelle;intracellular part;membrane-bounded organelle;nucleus;organelle		Acetylation;Alternativesplicing;Cellcycle;Coiledcoil;Completeproteome;Cytoplasm;DNAreplication;Nucleus;Phosphoprotein;Proteintransport;Referenceproteome;Repeat;TPRrepeat;Transport
Q02780;B1AUB9;B1AUC0;Q02780-2;Q02780-3;Q02780-7;Q02780-4;B1AUB8;Q02780-5;Q02780-6;B1AUB6;F7CDR2	Q02780;B1AUB9;B1AUC0;Q02780-2;Q02780-3;Q02780-7;Q02780-4;B1AUB8;Q02780-5;Q02780-6;B1AUB6	Nuclear factor 1 A-type;Nuclear factor 1	Nfia	28.8648	28.9202	28.8303	28.8991	28.5611	28.1102	28.5457	28.323	28.4377	28.2167	+	1.33326	0.0331636	-0.54379	9	9	6	19	19	13.2	58.552	0	29.487	13921000000	87	biological regulation;biosynthetic process;cellular biosynthetic process;cellular macromolecule biosynthetic process;cellular macromolecule metabolic process;cellular metabolic process;cellular nitrogen compound metabolic process;cellular process;DNA metabolic process;DNA replication;macromolecule biosynthetic process;macromolecule metabolic process;metabolic process;nitrogen compound metabolic p…	binding;DNA binding;nucleic acid binding;nucleic acid binding transcription factor activity;sequence-specific DNA binding transcription factor activity	cell junction;cell part;intracellular membrane-bounded organelle;intracellular organelle;intracellular part;membrane-bounded organelle;nucleus;organelle		Activator;Alternativesplicing;Completeproteome;DNA-binding;DNAreplication;Nitration;Nucleus;Phosphoprotein;Referenceproteome;Transcription;Transcriptionregulation
Q3UKV0;B1AUN3;B1AUN2	Q3UKV0;B1AUN3;B1AUN2		Eif2b3	NaN	NaN	NaN	NaN	NaN	24.9399	24.6901	NaN	NaN	NaN		0	0.945024	NaN	4	4	4	10.8	10.8	10.8	49.801	0	5.0858	704080000	12	anatomical structure development;biological regulation;cell development;cellular developmental process;cellular process;cellular response to stimulus;cellular response to stress;developmental process;glial cell development;negative regulation of biological process;negative regulation of biosynthetic process;negative regulation of cellular biosynthetic process;negative regulation of cellular macro…	binding;catalytic activity;enzyme regulator activity;GTPase regulator activity;guanyl-nucleotide exchange factor activity;nucleic acid binding;nucleoside-triphosphatase regulator activity;nucleotidyltransferase activity;RNA binding;transferase activity;transferase activity, transferring phosphorus-containing groups;translation factor activity, nucleic acid binding;translation initiation factor ac…	cell part;cytoplasmic part;eukaryotic translation initiation factor 2B complex;intracellular part;macromolecular complex;protein complex	RNA transport	Completeproteome;Referenceproteome
Q05AA6;B1AV35	Q05AA6;B1AV35	Dystrophin-related protein 2	Drp2	29.984	30.0383	30.4586	30.5541	30.5295	29.3296	29.5383	29.6008	30.2172	30.1026	+	1.39766	0.0244324	-0.726298	15	15	15	21.8	21.8	21.8	108.05	0	90.162	20877000000	221		binding;calcium ion binding;cation binding;ion binding;metal ion binding;transition metal ion binding;zinc ion binding	cell part;cytoplasm;cytoskeleton;intracellular non-membrane-bounded organelle;intracellular organelle;intracellular part;membrane;non-membrane-bounded organelle;organelle;plasma membrane		Completeproteome;Cytoplasm;Cytoskeleton;Metal-binding;Phosphoprotein;Referenceproteome;Repeat;Zinc;Zinc-finger
Q8BR70;B1AV66	Q8BR70;B1AV66	Protein YIPF6;Protein YIPF	Yipf6	NaN	NaN	NaN	NaN	NaN	NaN	24.176	NaN	NaN	NaN		0	0.94461	NaN	1	1	1	5.9	5.9	5.9	26.087	0.00052083	2.1788	347400000	1	anatomical structure development;cell development;cellular developmental process;cellular process;columnar/cuboidal epithelial cell development;developmental process;epithelial cell development;intestinal epithelial cell development	binding;identical protein binding;protein binding	cell part;cis-Golgi network;coated vesicle;cytoplasmic membrane-bounded vesicle;cytoplasmic part;cytoplasmic vesicle;endoplasmic reticulum;ER to Golgi transport vesicle;Golgi apparatus part;integral to membrane;intracellular membrane-bounded organelle;intracellular organelle;intracellular organelle part;intracellular part;intrinsic to membrane;membrane;membrane part;membrane-bounded organelle;mem…		Completeproteome;Glycoprotein;Membrane;Referenceproteome;Transmembrane;Transmembranehelix
B1AVD1;B1AVD2;Q8BU59	B1AVD1;B1AVD2;Q8BU59		Xpnpep2	26.3065	NaN	26.4992	26.401	26.2079	26.0102	25.9722	NaN	26.0426	NaN	+	1.27993	0.0529772	-0.411591	6	6	6	9.3	9.3	9.3	76.433	0	12.605	1633700000	15	cellular process	aminopeptidase activity;binding;catalytic activity;cation binding;exopeptidase activity;hydrolase activity;ion binding;metal ion binding;peptidase activity;peptidase activity, acting on L-amino acid peptides		Protein digestion and absorption	Aminopeptidase;Completeproteome;Hydrolase;Metal-binding;Protease;Referenceproteome
B1AVZ0	B1AVZ0	Uracil phosphoribosyltransferase homolog	Uprt	NaN	NaN	NaN	NaN	NaN	NaN	NaN	NaN	NaN	NaN		-4.34294e-08	1	0	2	2	2	7.7	7.7	7.7	34.278	0	11.875	289110000	12	biological regulation;biosynthetic process;body fluid secretion;cellular biosynthetic process;cellular metabolic process;cellular nitrogen compound biosynthetic process;cellular nitrogen compound metabolic process;cellular process;establishment of localization;female pregnancy;heterocycle biosynthetic process;heterocycle metabolic process;lactation;metabolic process;multicellular organismal proce…		cell part;cytoplasm;intracellular membrane-bounded organelle;intracellular organelle;intracellular part;membrane-bounded organelle;nucleus;organelle	Pyrimidine metabolism	Completeproteome;Cytoplasm;Nucleus;Referenceproteome
B1AWE0;Q6PFA2;O08585;B1AWE1;B1AWD8;B1AWD9	B1AWE0;Q6PFA2;O08585;B1AWE1;B1AWD8;B1AWD9	Clathrin light chain A	Clta	28.9819	28.6119	28.5339	28.7745	28.0236	29.4647	29.1904	29.1368	28.8797	28.9835	+	1.24173	0.0344348	0.618323	7	7	7	29.2	29.2	29.2	23.478	0	315.48	25733000000	107	cellular component organization;cellular component organization or biogenesis;cellular membrane organization;cellular process;endocytosis;establishment of localization;establishment of localization in cell;establishment of protein localization;intracellular protein transport;intracellular transport;membrane invagination;membrane organization;protein transport;transport;vesicle-mediated transport	binding;peptide binding;structural molecule activity	cell part;clathrin coat;clathrin coat of coated pit;clathrin coat of trans-Golgi network vesicle;clathrin vesicle coat;cytoplasmic membrane-bounded vesicle;cytoplasmic part;cytoplasmic vesicle;cytoplasmic vesicle part;Golgi apparatus part;intracellular membrane-bounded organelle;intracellular organelle;intracellular organelle part;intracellular part;macromolecular complex;membrane coat;membrane p…	Bacterial invasion of epithelial cells;Endocrine and other factor-regulated calcium reabsorption;Endocytosis;Huntington's disease;Lysosome	Calcium;Coatedpit;Completeproteome;Cytoplasmicvesicle;Membrane;Phosphoprotein;Referenceproteome
B1AWN6;A2APX8;A2ASI5;A2APX7;A2APX6;Q9JJV9;Q9WTU3;Q62205;Q9ER60;F8VPQ7;F6U9Y2;F7AMU5;F7D6K4;F7D6J5;E9PW82;B1AYL0;F7D6H8;F6U329;K3W4N7;Q9WTU3-4;Q9WTU3-2;Q9WTU3-5;Q9WTU3-3;Q9JJV9-2	B1AWN6;A2APX8;A2ASI5;A2APX7;A2APX6	Sodium channel protein	Scn2a1;Scn1a;Scn3a	25.4954	NaN	NaN	25.8624	NaN	25.3441	NaN	25.5855	26.9864	NaN		0	0.944196	-0.151291	3	3	2	2.1	2.1	1.5	227.94	0	2.6619	728220000	6	adult behavior;adult locomotory behavior;adult walking behavior;anatomical structure development;apoptosis;behavior;behavioral response to pain;biological regulation;cardiac chamber development;cardiac ventricle development;cation transport;cell death;cellular chemical homeostasis;cellular homeostasis;cellular ion homeostasis;cellular process;cellular response to calcium ion;cellular response to …	adenyl nucleotide binding;adenyl ribonucleotide binding;alkali metal ion binding;ATP binding;binding;cation binding;cation channel activity;cation transmembrane transporter activity;channel activity;gated channel activity;ion binding;ion channel activity;ion transmembrane transporter activity;metal ion binding;nucleotide binding;passive transmembrane transporter activity;purine nucleotide binding…	axon part;cation channel complex;cell body;cell junction;cell part;cell projection;cell projection part;cell surface;cell-cell contact zone;cell-cell junction;contractile fiber part;cytoplasm;cytoplasmic part;dendrite;initial segment;integral to membrane;intercalated disc;intracellular part;intrinsic to membrane;ion channel complex;macromolecular complex;membrane;membrane part;neuron projection;n…		Alternativesplicing;ATP-binding;Calmodulin-binding;Coiledcoil;Completeproteome;Diseasemutation;Glycoprotein;Ionchannel;Iontransport;Membrane;Methylation;Nucleotide-binding;Phosphoprotein;Polymorphism;Referenceproteome;Repeat;Sodium;Sodiumchannel;Sodiumtransport;Transmembrane;Transmembranehelix;Transport;Ublconjugation;Voltage-gatedchannel
Q99K51;B1AX58;Q3V0K9	Q99K51;B1AX58	Plastin-3	Pls3	28.8827	28.7046	28.9261	28.9912	28.8661	28.9859	28.9142	28.8495	28.8245	28.9038		0.512368	0.424711	0.112241	22	22	19	38.9	38.9	34.6	70.741	0	293.32	43303000000	269		binding;calcium ion binding;cation binding;ion binding;metal ion binding	cell part;cytoplasm;intracellular part		Actin-binding;Calcium;Completeproteome;Cytoplasm;Directproteinsequencing;Isopeptidebond;Metal-binding;Phosphoprotein;Referenceproteome;Repeat;Ublconjugation
Q9DBS2;B1AX95	Q9DBS2;B1AX95	Tumor protein p63-regulated gene 1-like protein	Tprg1l;Tprgl	NaN	NaN	NaN	NaN	NaN	NaN	NaN	25.3035	NaN	NaN		-4.34294e-08	1	0	3	3	3	19.9	19.9	19.9	29.814	0	96.306	771780000	9			cell junction;cell part;clathrin-coated vesicle;coated vesicle;cytoplasmic membrane-bounded vesicle;cytoplasmic part;cytoplasmic vesicle;intracellular membrane-bounded organelle;intracellular organelle;intracellular part;membrane-bounded organelle;membrane-bounded vesicle;organelle;synapse part;synaptic vesicle;vesicle		Celljunction;Completeproteome;Cytoplasmicvesicle;Phosphoprotein;Referenceproteome;Synapse
P18654;B1AXN9;B1AXP0;P18653;E9PWV3;Q505N6;F6RQA2;F6Q8A4;Q7TPS0;B1AXN8;B1AXN5;G3UZI3;A2CEE6;A2CEE5;E9PUP0;A2CEE7;E9QK39;Q7TPS0-2;Q7TPS0-3;Q9WUT3;F6UG16;B2GVN8;Q811L6;Q9R1L5;Q3U214;Q8C0P0;B1AXN7;A2CEE8;B1B0X1;E9Q6Q5;E9Q6G0;E9Q4Q9;E9Q1M8;E9Q8S5;E9PWX8;E9QPR4;A0A0A6YXG1;Q8C0P0-2;Q811L6-2	P18654;B1AXN9	Ribosomal protein S6 kinase alpha-3	Rps6ka3	27.8385	28.1759	27.6972	28.1709	27.9091	28.2235	28.2048	28.2981	27.949	28.1494		0.722728	0.161642	0.310283	16	16	15	22.2	22.2	21.1	83.693	0	17.485	12266000000	121	activation of immune response;activation of innate immune response;anatomical structure development;apoptosis;biological regulation;brain renin-angiotensin system;cardiac muscle cell apoptosis;cell cycle;cell cycle phase;cell cycle process;cell death;cell division;cell maturation;cellular component organization;cellular component organization at cellular level;cellular component organization or b…	adenyl nucleotide binding;adenyl ribonucleotide binding;ATP binding;binding;caspase inhibitor activity;caspase regulator activity;catalytic activity;cation binding;cysteine-type endopeptidase inhibitor activity;endopeptidase inhibitor activity;endopeptidase regulator activity;enzyme binding;enzyme inhibitor activity;enzyme regulator activity;ion binding;kinase activity;magnesium ion binding;metal…	cell division site part;cell part;centrosome;cleavage furrow;cytoplasm;cytoplasmic part;cytoskeletal part;cytoskeleton;cytosol;intracellular membrane-bounded organelle;intracellular non-membrane-bounded organelle;intracellular organelle;intracellular organelle part;intracellular part;membrane;membrane-bounded organelle;microtubule organizing center;non-membrane-bounded organelle;nucleus;organelle…	Long-term potentiation;MAPK signaling pathway;mTOR signaling pathway;Neurotrophin signaling pathway;Oocyte meiosis;Progesterone-mediated oocyte maturation	3D-structure;Alternativesplicing;ATP-binding;Cellcycle;Celldivision;Cellmembrane;Completeproteome;Cytoplasm;Cytoskeleton;Isopeptidebond;Kinase;Magnesium;Membrane;Metal-binding;Mitosis;Nucleotide-binding;Nucleus;Phosphoprotein;Referenceproteome;Repeat;Serine/threonine-proteinkinase;Stressresponse;Transferase;Tumorsuppressor;Ublconjugation
Q9DC11;B1AY86;B1AY85	Q9DC11;B1AY86;B1AY85	Plexin domain-containing protein 2	Plxdc2	NaN	NaN	NaN	NaN	NaN	NaN	NaN	NaN	NaN	NaN		-4.34294e-08	1	0	2	2	2	5.3	5.3	5.3	59.616	0	3.6027	279840000	5			cell part;integral to membrane;intrinsic to membrane;membrane;membrane part;plasma membrane		Completeproteome;Glycoprotein;Membrane;Phosphoprotein;Referenceproteome;Signal;Transmembrane;Transmembranehelix
B1AYL1	B1AYL1	Sodium channel protein	Scn7a	25.6735	25.9093	25.9151	25.8077	25.1522	25.2058	NaN	NaN	NaN	NaN		0	0.943783	-0.626801	2	2	2	1.1	1.1	1.1	192.18	0.0076177	1.2068	580540000	10	cation transport;cellular process;establishment of localization;ion transmembrane transport;ion transport;metal ion transport;monovalent inorganic cation transport;sodium ion transmembrane transport;sodium ion transport;transmembrane transport;transport	cation channel activity;cation transmembrane transporter activity;channel activity;gated channel activity;ion channel activity;ion transmembrane transporter activity;passive transmembrane transporter activity;sodium channel activity;substrate-specific channel activity;substrate-specific transmembrane transporter activity;substrate-specific transporter activity;transmembrane transporter activity;t…	cation channel complex;cell part;ion channel complex;macromolecular complex;membrane part;plasma membrane part;protein complex;sodium channel complex;voltage-gated sodium channel complex		Completeproteome;Ionchannel;Iontransport;Membrane;Referenceproteome;Sodium;Sodiumchannel;Sodiumtransport;Transmembrane;Transport;Voltage-gatedchannel
Q8C5N3;B1AYU4;B1AYU7;Q8C5N3-2;A2AK44;A2AK42;J3QNR0;J3QM48	Q8C5N3;B1AYU4;B1AYU7;Q8C5N3-2;A2AK44;A2AK42	Pre-mRNA-splicing factor CWC22 homolog	Cwc22;Gm13695;Gm13697	NaN	NaN	NaN	NaN	NaN	25.1982	25.1233	NaN	NaN	NaN		0	0.94337	NaN	4	4	4	4.7	4.7	4.7	104.77	0	5.5611	941800000	15	cellular macromolecule metabolic process;cellular metabolic process;cellular nitrogen compound metabolic process;cellular process;macromolecule metabolic process;metabolic process;mRNA metabolic process;mRNA processing;nitrogen compound metabolic process;nucleic acid metabolic process;nucleobase-containing compound metabolic process;primary metabolic process;RNA metabolic process;RNA processing;R…	binding;DNA binding;nucleic acid binding;RNA binding	cell part;intracellular organelle part;intracellular part;macromolecular complex;nuclear part;organelle part;ribonucleoprotein complex;spliceosomal complex		Alternativesplicing;Completeproteome;mRNAprocessing;mRNAsplicing;Nucleus;Phosphoprotein;Referenceproteome;Spliceosome
Q3UMF0;Q3UMF0-2;B1AZ15;B1AZ14;Q3UMF0-3;Q3UMF0-4;B1AZ26;B1AZ25;B1AZ20	Q3UMF0;Q3UMF0-2;B1AZ15;B1AZ14;Q3UMF0-3;Q3UMF0-4	Cordon-bleu protein-like 1	Cobll1	28.7713	28.0286	28.0631	27.9697	27.783	28.083	28.0646	28.7157	28.0067	28.278		0.265296	0.477301	-0.213867	15	15	15	16.5	16.5	16.5	137.38	0	29.523	4845300000	73					Alternativesplicing;Completeproteome;Phosphoprotein;Referenceproteome
B1AZI6;E9Q5E2;F6SBF2	B1AZI6	THO complex subunit 2	Thoc2	25.9015	26.2959	26.3377	26.1506	26.1626	26.8861	26.4741	26.4368	26.321	26.4361	+	0.907984	0.0846617	0.501756	10	10	10	6.1	6.1	6.1	182.77	0	11.661	2771500000	55	cellular macromolecule metabolic process;cellular metabolic process;cellular nitrogen compound metabolic process;cellular process;establishment of localization;establishment of RNA localization;macromolecule metabolic process;metabolic process;mRNA metabolic process;mRNA processing;mRNA transport;nitrogen compound metabolic process;nucleic acid metabolic process;nucleic acid transport;nucleobase-…	binding;nucleic acid binding;RNA binding	cell part;intracellular membrane-bounded organelle;intracellular organelle;intracellular part;membrane-bounded organelle;nucleus;organelle	RNA transport;Spliceosome	Coiledcoil;Completeproteome;mRNAprocessing;mRNAsplicing;mRNAtransport;Nucleus;Phosphoprotein;Referenceproteome;RNA-binding;Transport
B1AZP2;B1AZP2-2;H3BJD4;I1E4X0;F6YMR0;E9PUF2;B7ZNS2;B1AZP2-3	B1AZP2;B1AZP2-2;H3BJD4;I1E4X0;F6YMR0;E9PUF2;B7ZNS2;B1AZP2-3	Disks large-associated protein 4	Dlgap4	NaN	NaN	NaN	NaN	NaN	NaN	NaN	NaN	NaN	NaN		-4.34294e-08	1	0	2	2	2	2	2	2	108.04	0.001241	1.7813	4874000000	2	cell communication;cell-cell signaling;cellular process;signaling		cell part;membrane;synapse		Alternativesplicing;Completeproteome;Membrane;Phosphoprotein;Referenceproteome
E9PZ16;Q05793;B1B0C7	E9PZ16;Q05793;B1B0C7	Basement membrane-specific heparan sulfate proteoglycan core protein;Endorepellin;LG3 peptide	Hspg2	26.2383	26.8219	26.8092	26.6799	26.7566	26.8872	26.9806	26.6479	26.9864	26.7806		0.517704	0.236669	0.310745	15	15	15	4	4	4	469.78	0	35.851	4109300000	77	anatomical structure development;anatomical structure formation involved in morphogenesis;anatomical structure morphogenesis;angiogenesis;brain development;cardiac muscle tissue development;cartilage development;cartilage development involved in endochondral bone morphogenesis;cell differentiation;cellular component organization;cellular component organization at cellular level;cellular component…	binding;cation binding;ion binding;metal ion binding	basal lamina;cell part;cytoplasmic part;extracellular matrix part;extracellular membrane-bounded organelle;extracellular organelle;extracellular region part;extracellular space;extracellular vesicular exosome;Golgi apparatus part;Golgi lumen;intracellular organelle lumen;intracellular organelle part;intracellular part;membrane-bounded organelle;membrane-bounded vesicle;membrane-enclosed lumen;org…	ECM-receptor interaction	3D-structure;Angiogenesis;Basementmembrane;Calcium;Completeproteome;Directproteinsequencing;Disulfidebond;EGF-likedomain;Extracellularmatrix;Glycoprotein;Heparansulfate;Immunoglobulindomain;LamininEGF-likedomain;Metal-binding;Proteoglycan;Referenceproteome;Repeat;Secreted;Signal
Q6PDN3;B1B1A8;Q6PDN3-3;Q6PDN3-4	Q6PDN3;B1B1A8;Q6PDN3-3	Myosin light chain kinase, smooth muscle;Myosin light chain kinase, smooth muscle, deglutamylated form	Mylk	33.5535	33.187	33.2609	32.6625	33.1576	33.0619	32.9161	33.0699	32.5891	32.928		0.952443	0.106354	-0.344808	37	37	16	21.3	21.3	9.1	212.92	0	323.31	128420000000	573	anatomical structure morphogenesis;aorta smooth muscle tissue morphogenesis;biological regulation;bleb assembly;cell projection assembly;cell projection organization;cellular component assembly;cellular component assembly at cellular level;cellular component organization;cellular component organization at cellular level;cellular component organization or biogenesis;cellular component organization…	adenyl nucleotide binding;adenyl ribonucleotide binding;ATP binding;binding;catalytic activity;cation binding;ion binding;kinase activity;metal ion binding;myosin light chain kinase activity;nucleotide binding;phosphotransferase activity, alcohol group as acceptor;protein kinase activity;protein serine/threonine kinase activity;purine nucleotide binding;purine ribonucleoside triphosphate binding;…	actin filament bundle;actomyosin;cell division site part;cell part;cell projection;cleavage furrow;cytoplasm;cytoskeletal part;cytoskeleton;intracellular non-membrane-bounded organelle;intracellular organelle;intracellular organelle part;intracellular part;lamellipodium;membrane;non-membrane-bounded organelle;organelle;organelle part;plasma membrane;stress fiber	Calcium signaling pathway;Focal adhesion;Gastric acid secretion;Regulation of actin cytoskeleton;Vascular smooth muscle contraction	Actin-binding;Alternativeinitiation;Alternativepromoterusage;Alternativesplicing;ATP-binding;Calcium;Calmodulin-binding;Cellprojection;Completeproteome;Cytoplasm;Cytoskeleton;Disulfidebond;Immunoglobulindomain;Kinase;Magnesium;Metal-binding;Nucleotide-binding;Phosphoprotein;Referenceproteome;Repeat;Serine/threonine-proteinkinase;Transferase
B2KF29;Q9CQC2	B2KF29;Q9CQC2	Colipase	Clps	NaN	NaN	NaN	NaN	NaN	NaN	NaN	NaN	NaN	NaN		-4.34294e-08	1	0	1	1	1	25	25	25	7.8912	0.0074471	1.2606	603030000	2	biological regulation;catabolic process;digestion;lipid catabolic process;lipid metabolic process;metabolic process;multicellular organismal process;positive regulation of catalytic activity;positive regulation of molecular function;primary metabolic process;regulation of biological process;regulation of catalytic activity;regulation of metabolic process;regulation of molecular function	enzyme activator activity;enzyme regulator activity	extracellular region	Fat digestion and absorption	Completeproteome;Digestion;Disulfidebond;Lipiddegradation;Lipidmetabolism;Referenceproteome;Secreted;Signal
P47811;B2KF35;P47811-2;P47811-4;P47811-3;B2KF34	P47811;B2KF35;P47811-2;P47811-4	Mitogen-activated protein kinase 14	Mapk14	NaN	NaN	NaN	NaN	NaN	NaN	NaN	NaN	NaN	NaN		-4.34294e-08	1	0	3	3	3	9.4	9.4	9.4	41.287	0	4.2654	1392700000	18	aging;alcohol metabolic process;anatomical structure development;anatomical structure formation involved in morphogenesis;anatomical structure morphogenesis;angiogenesis;apoptosis;biological adhesion;biological regulation;biosynthetic process;carbohydrate metabolic process;carboxylic acid metabolic process;cartilage condensation;cell adhesion;cell aging;cell cycle checkpoint;cell death;cell diffe…	adenyl nucleotide binding;adenyl ribonucleotide binding;ATP binding;binding;catalytic activity;kinase activity;MAP kinase activity;molecular transducer activity;nucleotide binding;phosphotransferase activity, alcohol group as acceptor;protein kinase activity;protein serine/threonine kinase activity;purine nucleotide binding;purine ribonucleoside triphosphate binding;purine ribonucleotide binding;…	cell part;cytoplasmic part;cytoskeletal part;cytosol;intracellular membrane-bounded organelle;intracellular organelle;intracellular organelle part;intracellular part;membrane-bounded organelle;mitochondrion;nucleus;organelle;organelle part;spindle pole	Amyotrophic lateral sclerosis (ALS);Chagas disease (American trypanosomiasis);Epithelial cell signaling in Helicobacter pylori infection;Fc epsilon RI signaling pathway;GnRH signaling pathway;Hepatitis C;ko05152;Leishmaniasis;Leukocyte transendothelial migration;MAPK signaling pathway;MAPK signaling pathway - yeast;Neurotrophin signaling pathway;NOD-like receptor signaling pathway;Osteoclast diff…	3D-structure;Acetylation;Alternativesplicing;Apoptosis;ATP-binding;Completeproteome;Cytoplasm;Directproteinsequencing;Kinase;Nucleotide-binding;Nucleus;Phosphoprotein;Referenceproteome;Serine/threonine-proteinkinase;Stressresponse;Transcription;Transcriptionregulation;Transferase;Ublconjugation
O89112;B2KGR2	O89112;B2KGR2	LanC-like protein 1	Lancl1	27.0977	26.9421	26.9929	27.5004	27.3698	26.5073	27.0239	26.5721	26.9105	26.9095		0.508252	0.273478	-0.245301	3	3	3	7.8	7.8	7.8	45.341	0	28.95	3632400000	41	metabolic process	amine binding;amino acid binding;binding;carboxylic acid binding;catalytic activity;cation binding;glutathione binding;ion binding;lipoprotein particle receptor binding;low-density lipoprotein particle receptor binding;metal ion binding;modified amino acid binding;peptide binding;protein binding;receptor binding;transition metal ion binding;zinc ion binding	cell part;cytoplasm;cytoskeleton;intracellular membrane-bounded organelle;intracellular non-membrane-bounded organelle;intracellular organelle;intracellular part;membrane;membrane-bounded organelle;microtubule cytoskeleton;non-membrane-bounded organelle;nucleus;organelle		Acetylation;Completeproteome;Cytoplasm;Membrane;Metal-binding;Nucleus;Referenceproteome;Zinc
B2M1R6;P61979-3;P61979;P61979-2;D3Z5X4;D3YWG1;H3BKD0;H3BLL4;H3BKI8;H3BK96;H3BJS9;Q8BT23;H3BJ43;H3BLP7	B2M1R6;P61979-3;P61979;P61979-2;D3Z5X4;D3YWG1;H3BKD0;H3BLL4;H3BKI8;H3BK96	Heterogeneous nuclear ribonucleoprotein K	Hnrnpk;Gm7964	32.3988	32.5157	32.3723	32.3711	32.4111	32.5539	32.4364	32.4365	32.2554	32.1204		0.372313	0.590783	0.0662111	18	18	18	50.5	50.5	50.5	48.562	0	323.31	173620000000	419	biological regulation;cellular macromolecule metabolic process;cellular metabolic process;cellular nitrogen compound metabolic process;cellular process;macromolecule metabolic process;metabolic process;mRNA metabolic process;mRNA processing;nitrogen compound metabolic process;nucleic acid metabolic process;nucleobase-containing compound metabolic process;positive regulation of biological process;…	binding;core promoter proximal region DNA binding;core promoter proximal region sequence-specific DNA binding;DNA binding;nucleic acid binding;nucleic acid binding transcription factor activity;regulatory region DNA binding;regulatory region nucleic acid binding;RNA binding;RNA polymerase II core promoter proximal region sequence-specific DNA binding;RNA polymerase II core promoter proximal regio…	catalytic step 2 spliceosome;cell junction;cell part;cell projection;chromatin;chromosomal part;cytoplasm;cytoskeletal part;intracellular non-membrane-bounded organelle;intracellular organelle;intracellular organelle part;intracellular part;macromolecular complex;non-membrane-bounded organelle;nuclear chromatin;nuclear chromosome part;nuclear part;nucleoplasm;organelle;organelle part;podosome;pro…	Spliceosome	Acetylation;Activator;Alternativesplicing;Celljunction;Cellprojection;Completeproteome;Cytoplasm;Directproteinsequencing;DNA-binding;Glycoprotein;Isopeptidebond;Methylation;mRNAprocessing;mRNAsplicing;Nucleus;Phosphoprotein;Referenceproteome;Repeat;Repressor;Ribonucleoprotein;RNA-binding;Spliceosome;Transcription;Transcriptionregulation;Ublconjugation;Viralnucleoprotein;Virion
B2RQC6;E9QAI5;G3UWN2;B2RQC6-2;E9QAT6;Q8C196	B2RQC6;E9QAI5;G3UWN2;B2RQC6-2	CAD protein;Glutamine-dependent carbamoyl-phosphate synthase;Aspartate carbamoyltransferase;Dihydroorotase	Cad	28.1023	28.5145	28.5203	28.1302	28.4221	29.0424	28.6539	28.6566	28.4263	28.4976	+	0.872806	0.0975925	0.469138	31	31	31	16.6	16.6	16.6	243.24	0	179.69	18270000000	234	acylglycerol catabolic process;acylglycerol metabolic process;amide biosynthetic process;amine catabolic process;amine metabolic process;anatomical structure development;anatomical structure morphogenesis;anion homeostasis;biological regulation;biosynthetic process;body fluid secretion;carbamoyl phosphate biosynthetic process;carbamoyl phosphate metabolic process;carbohydrate catabolic process;ca…	adenyl nucleotide binding;adenyl ribonucleotide binding;amine binding;amino acid binding;aspartate carbamoyltransferase activity;ATP binding;binding;calcium ion binding;carbamoyl-phosphate synthase (ammonia) activity;carbamoyl-phosphate synthase (glutamine-hydrolyzing) activity;carbon-nitrogen ligase activity, with glutamine as amido-N-donor;carboxyl- or carbamoyltransferase activity;carboxylic a…	axon part;cell body;cell part;cell projection part;cytoplasmic part;cytosol;intracellular membrane-bounded organelle;intracellular non-membrane-bounded organelle;intracellular organelle;intracellular organelle part;intracellular part;macromolecular complex;membrane;membrane-bounded organelle;mitochondrial inner membrane;mitochondrial membrane;mitochondrial nucleoid;mitochondrial part;mitochondrio…	Alanine, aspartate and glutamate metabolism;Arginine and proline metabolism;Nitrogen metabolism;Pyrimidine metabolism	Acetylation;Allostericenzyme;ATP-binding;Completeproteome;Directproteinsequencing;Ligase;Mitochondrion;Nucleotide-binding;Nucleus;Phosphoprotein;Referenceproteome;Repeat;Transitpeptide;Ureacycle
B2RQS1;Q9ERG2	B2RQS1;Q9ERG2	Striatin-3	Strn3	27.457	27.1977	27.2775	27.288	27.279	27.5449	27.3221	27.3077	27.3416	27.4174		0.384929	0.463143	0.122757	10	10	10	19.7	19.7	19.7	77.731	0	31.475	4786600000	86	biological regulation;negative regulation of biological process;negative regulation of biosynthetic process;negative regulation of cell communication;negative regulation of cellular biosynthetic process;negative regulation of cellular macromolecule biosynthetic process;negative regulation of cellular metabolic process;negative regulation of cellular process;negative regulation of estrogen recepto…	nucleic acid binding transcription factor activity;sequence-specific DNA binding transcription factor activity	cell body;cell part;cell projection;cytoplasmic part;dendrite;Golgi apparatus;intracellular membrane-bounded organelle;intracellular organelle;intracellular organelle part;intracellular part;macromolecular complex;membrane;membrane-bounded organelle;neuron projection;neuronal cell body;nuclear part;nucleoplasm;organelle;organelle part;plasma membrane;protein complex;protein phosphatase type 2A co…		Calmodulin-binding;Coiledcoil;Completeproteome;Cytoplasm;Membrane;Phosphoprotein;Referenceproteome;Repeat;WDrepeat
B2RR83	B2RR83	Probable ATP-dependent RNA helicase YTHDC2	Ythdc2	NaN	NaN	NaN	NaN	NaN	NaN	31.0777	NaN	NaN	NaN		0	0.942957	NaN	1	1	1	0.6	0.6	0.6	161.09	0.0076513	1.2299	42390000000	0		adenyl nucleotide binding;adenyl ribonucleotide binding;ATP binding;ATPase activity;ATPase activity, coupled;ATP-dependent helicase activity;binding;catalytic activity;helicase activity;hydrolase activity;hydrolase activity, acting on acid anhydrides;hydrolase activity, acting on acid anhydrides, in phosphorus-containing anhydrides;nucleic acid binding;nucleoside-triphosphatase activity;nucleotid…			ANKrepeat;ATP-binding;Completeproteome;Helicase;Hydrolase;Nucleotide-binding;Phosphoprotein;Referenceproteome;Repeat
Q9JMH9;Q9JMH9-6;Q9JMH9-4;K3W4L0;B2RRE2;E9QAX2;Q9JMH9-1;E9QA74;E9Q405;Q9JMH9-5;Q9JMH9-7;Q9JMH9-2	Q9JMH9;Q9JMH9-6;Q9JMH9-4;K3W4L0;B2RRE2;E9QAX2;Q9JMH9-1;E9QA74;E9Q405;Q9JMH9-5;Q9JMH9-7;Q9JMH9-2	Unconventional myosin-XVIIIa	Myo18a	29.3584	29.0396	29.1155	28.5721	29.7646	29.1481	28.0418	29.4142	28.1815	28.3365		0.563585	0.163825	-0.576283	7	7	7	3.5	3.5	3.5	232.75	0	16.204	13202000000	24	actin cytoskeleton organization;actin filament-based process;actomyosin structure organization;cell migration;cell motility;cellular component movement;cellular component organization;cellular component organization at cellular level;cellular component organization or biogenesis;cellular component organization or biogenesis at cellular level;cellular process;cytoskeleton organization;locomotion;o…	adenyl nucleotide binding;adenyl ribonucleotide binding;ATP binding;binding;catalytic activity;hydrolase activity;hydrolase activity, acting on acid anhydrides;hydrolase activity, acting on acid anhydrides, in phosphorus-containing anhydrides;motor activity;nucleoside-triphosphatase activity;nucleotide binding;purine nucleotide binding;purine ribonucleoside triphosphate binding;purine ribonucleot…	actomyosin;cell part;cytoplasmic part;cytoskeletal part;cytoskeleton;endoplasmic reticulum-Golgi intermediate compartment;intracellular membrane-bounded organelle;intracellular non-membrane-bounded organelle;intracellular organelle;intracellular organelle part;intracellular part;macromolecular complex;membrane-bounded organelle;myosin complex;non-membrane-bounded organelle;organelle;organelle par…		Alternativesplicing;ATP-binding;Coiledcoil;Completeproteome;Cytoplasm;Cytoskeleton;Motorprotein;Myosin;Nucleotide-binding;Phosphoprotein;Referenceproteome
B2RSH2;P20612;P50149;Q3V3I2;A2AE32;A0A0A6YXN0;A0A0A6YXC2;F6QPU5	B2RSH2	Guanine nucleotide-binding protein G(i) subunit alpha-1	Gnai1	27.2429	27.4012	27.4116	27.9171	27.7437	26.8963	27.2474	27.3204	27.5441	27.4321		0.807019	0.153434	-0.280073	12	4	4	41	15.8	15.8	40.361	0	95.082	3456300000	41	anatomical structure development;biological regulation;calcium ion homeostasis;cAMP-mediated signaling;cation homeostasis;cell cycle;cell development;cell division;cell proliferation;cell surface receptor linked signaling pathway;cellular calcium ion homeostasis;cellular cation homeostasis;cellular chemical homeostasis;cellular developmental process;cellular divalent inorganic cation homeostasis;…	binding;catalytic activity;cation binding;G-protein beta/gamma-subunit complex binding;G-protein-coupled receptor binding;GTP binding;GTPase activity;guanyl nucleotide binding;guanyl ribonucleotide binding;hydrolase activity;hydrolase activity, acting on acid anhydrides;hydrolase activity, acting on acid anhydrides, in phosphorus-containing anhydrides;ion binding;metabotropic serotonin receptor b…	apical plasma membrane;cell body;cell part;cell projection;centrosome;cilium;cytoplasm;cytoplasmic part;cytoskeletal part;extrinsic to internal side of plasma membrane;extrinsic to membrane;extrinsic to plasma membrane;heterotrimeric G-protein complex;intracellular membrane-bounded organelle;intracellular non-membrane-bounded organelle;intracellular organelle;intracellular organelle part;intracel…	Axon guidance;Chagas disease (American trypanosomiasis);Chemokine signaling pathway;Gap junction;Gastric acid secretion;Leukocyte transendothelial migration;Long-term depression;Melanogenesis;Phototransduction;Progesterone-mediated oocyte maturation;Tight junction;Toxoplasmosis	Cellcycle;Celldivision;Cellmembrane;Completeproteome;Cytoplasm;Cytoskeleton;Directproteinsequencing;GTP-binding;Lipoprotein;Magnesium;Membrane;Metal-binding;Myristate;Nucleotide-binding;Nucleus;Palmitate;Phosphoprotein;Referenceproteome;Sensorytransduction;Transducer;Vision
B2RUR8	B2RUR8	OTU domain-containing protein 7B	Otud7b	NaN	NaN	24.9896	NaN	NaN	NaN	24.9615	24.6658	24.7712	25.1363		0	0.942545	-0.0281696	4	4	2	6.1	6.1	3.1	91.982	0	5.344	747050000	17	biological regulation;cellular macromolecule metabolic process;cellular metabolic process;cellular process;cellular protein metabolic process;immune response;immune system process;macromolecule metabolic process;macromolecule modification;metabolic process;mucosal immune response;negative regulation of biological process;negative regulation of cell communication;negative regulation of cellular pr…	binding;catalytic activity;cation binding;cysteine-type peptidase activity;DNA binding;hydrolase activity;hydrolase activity, acting on ester bonds;ion binding;K63-linked polyubiquitin binding;metal ion binding;nucleic acid binding;peptidase activity;peptidase activity, acting on L-amino acid peptides;polyubiquitin binding;protein binding;small conjugating protein binding;thiolester hydrolase act…	cell part;cytoplasm;cytoskeleton;intracellular membrane-bounded organelle;intracellular non-membrane-bounded organelle;intracellular organelle;intracellular part;membrane-bounded organelle;microtubule cytoskeleton;non-membrane-bounded organelle;nucleus;organelle		Completeproteome;Cytoplasm;Hydrolase;Immunity;Metal-binding;Nucleus;Phosphoprotein;Protease;Referenceproteome;Thiolprotease;Ublconjugationpathway;Zinc;Zinc-finger
B2RXC1	B2RXC1	Trafficking protein particle complex subunit 11	Trappc11	25.2736	25.2464	25.3141	25.4848	NaN	25.3935	25.4626	NaN	NaN	25.4248		1.59418	0.159024	0.150026	6	6	6	5.5	5.5	5.5	128.39	0	4.9215	1450700000	17	cellular process;establishment of localization;transport;vesicle-mediated transport		cell part;cytoplasmic part;Golgi apparatus;intracellular membrane-bounded organelle;intracellular organelle;intracellular part;membrane-bounded organelle;organelle		Acetylation;Alternativesplicing;Completeproteome;ER-Golgitransport;Golgiapparatus;Referenceproteome;Transport
E9Q7H5;B2RXM2;J3QNY1;Q8BG05-2	E9Q7H5;B2RXM2;J3QNY1;Q8BG05-2	Heterogeneous nuclear ribonucleoprotein A3	Gm8991;Gm6793;Gm9242;Hnrnpa3	31.2179	31.234	31.0853	30.997	31.2362	31.7529	31.7744	31.4895	31.2381	31.3739	+	2.61025	0.00756044	0.584564	14	14	2	42.7	42.7	4.7	32.574	0	323.31	91133000000	219	cellular macromolecule metabolic process;cellular metabolic process;cellular nitrogen compound metabolic process;cellular process;macromolecule metabolic process;metabolic process;mRNA metabolic process;mRNA processing;nitrogen compound metabolic process;nucleic acid metabolic process;nucleobase-containing compound metabolic process;primary metabolic process;RNA metabolic process;RNA processing;R…	binding;nucleic acid binding;nucleotide binding;RNA binding	catalytic step 2 spliceosome;cell part;intracellular non-membrane-bounded organelle;intracellular organelle;intracellular organelle part;intracellular part;macromolecular complex;non-membrane-bounded organelle;nuclear part;nucleolus;organelle;organelle part;ribonucleoprotein complex;spliceosomal complex	Spliceosome	Acetylation;Alternativesplicing;Completeproteome;Directproteinsequencing;Methylation;mRNAprocessing;mRNAsplicing;Nucleus;Phosphoprotein;Referenceproteome;Repeat;Ribonucleoprotein;RNA-binding;Spliceosome
Q8BVU0;B7ZWM8;B2RXP1;E9QAU9;E9Q892	Q8BVU0;B7ZWM8;B2RXP1;E9QAU9	Leucine-rich repeat and calponin homology domain-containing protein 3	Lrch3	24.6469	NaN	24.2674	24.3448	24.6965	24.5037	24.9137	24.5286	24.5384	24.1776		0.33453	0.391718	0.25154	3	3	3	5.1	5.1	5.1	86.34	0	7.9272	836430000	37			extracellular region		Completeproteome;Leucine-richrepeat;Phosphoprotein;Referenceproteome;Repeat;Secreted;Signal
B2RXW8;B2RXQ2;P60469;Q8BSS9;S4R1I7;S4R1D4;F6UYF1;B8QI35;B8QI34	B2RXW8;B2RXQ2		Ppfia1	NaN	NaN	NaN	NaN	NaN	NaN	NaN	NaN	24.2348	NaN		-4.34294e-08	1	0	4	4	4	3.5	3.5	3.5	140.13	0	19.967	412030000	10			cell part;cell surface;cytoplasm;intracellular part;synapse		Coiledcoil;Completeproteome;Cytoplasm;Phosphoprotein;Referenceproteome;Repeat
B2RXS4;Q9QZC2;Q3UH93;Q8CJH3	B2RXS4	Plexin-B2	Plxnb2	26.6633	26.7183	26.4185	26.8661	26.7287	26.8164	26.9886	26.7505	26.7046	26.2713		0.954008	0.115498	0.302454	17	17	17	11.7	11.7	11.7	206.23	0	57.514	5644900000	72	anatomical structure development;anatomical structure formation involved in morphogenesis;anatomical structure morphogenesis;biological regulation;brain development;branching morphogenesis of a tube;cell migration;cell motility;cell part morphogenesis;cell projection morphogenesis;cell projection organization;cell proliferation;cellular component assembly;cellular component assembly at cellular l…	molecular transducer activity;receptor activity;semaphorin receptor activity;signal transducer activity;signaling receptor activity;transmembrane signaling receptor activity	cell part;integral to membrane;integral to plasma membrane;intracellular;intrinsic to membrane;intrinsic to plasma membrane;macromolecular complex;membrane part;plasma membrane part;protein complex;receptor complex;semaphorin receptor complex	Axon guidance	Angiogenesis;Cellmembrane;Coiledcoil;Completeproteome;Developmentalprotein;Disulfidebond;Glycoprotein;Membrane;Phosphoprotein;Receptor;Referenceproteome;Repeat;Signal;Transmembrane;Transmembranehelix
B2RY56;S4R2B0;S4R2J1;S4R2A4	B2RY56	RNA-binding protein 25	Rbm25	27.6614	28.1463	27.8577	27.7757	27.6314	28.1629	28.0364	27.9792	27.9289	27.6371		0.465075	0.319715	0.211173	12	12	12	16.9	16.9	16.9	99.551	0	132.51	8043100000	97	biological regulation;cellular macromolecule metabolic process;cellular metabolic process;cellular nitrogen compound metabolic process;cellular process;macromolecule metabolic process;metabolic process;mRNA metabolic process;mRNA processing;nitrogen compound metabolic process;nucleic acid metabolic process;nucleobase-containing compound metabolic process;primary metabolic process;regulation of al…	binding;mRNA binding;nucleic acid binding;nucleotide binding;RNA binding	cell part;cytoplasm;intracellular organelle part;intracellular part;nuclear body;nuclear part;nuclear speck;nucleoplasm part;organelle part	Spliceosome	Apoptosis;Completeproteome;Cytoplasm;Isopeptidebond;mRNAprocessing;mRNAsplicing;Nucleus;Phosphoprotein;Referenceproteome;RNA-binding;Ublconjugation
Q570Y9;B2ZRS5;Q570Y9-2;Q570Y9-3	Q570Y9;B2ZRS5;Q570Y9-2;Q570Y9-3	DEP domain-containing mTOR-interacting protein	Deptor	23.9983	NaN	NaN	NaN	NaN	23.5356	NaN	23.9506	23.639	23.5716		0	0.942133	-0.46262	2	2	2	5.6	5.6	5.6	46.119	0	3.2035	381910000	15	biological regulation;cellular component organization;cellular component organization or biogenesis;cellular process;cellular response to stimulus;intracellular signal transduction;negative regulation of biological process;negative regulation of catalytic activity;negative regulation of cell communication;negative regulation of cell size;negative regulation of cellular process;negative regulation…		cell part;intracellular		Acetylation;Alternativesplicing;Completeproteome;Phosphoprotein;Referenceproteome;Repeat
Q8BTM8;B7FAU9;B7FAV1;F6XC15;J3JS91;F6Z2C0;Q8BTM8-2;F7AVL7	Q8BTM8;B7FAU9;B7FAV1	Filamin-A	Flna	36.1364	35.8397	35.727	35.4842	35.6291	35.9556	35.8874	35.9188	35.505	35.7917		0.0428335	0.912084	0.0204735	118	118	106	58.3	58.3	54.7	281.22	0	323.31	1169500000000	2650	actin crosslink formation;actin cytoskeleton organization;actin cytoskeleton reorganization;actin filament organization;actin filament-based process;anatomical structure formation involved in morphogenesis;anatomical structure morphogenesis;biological regulation;cAMP-mediated signaling;cell cycle process;cell morphogenesis;cell morphogenesis involved in differentiation;cell projection assembly;ce…	actin binding;actin filament binding;binding;cytoskeletal protein binding;enzyme binding;Fc-gamma receptor I complex binding;glycoprotein binding;GTPase binding;immunoglobulin receptor binding;kinase binding;molecular transducer activity;protein binding;protein kinase binding;protein kinase C binding;Rac GTPase binding;Ras GTPase binding;receptor binding;Rho GTPase binding;signal transducer activ…	actin cytoskeleton;cell cortex;cell part;chromosomal part;cytoplasm;cytoplasmic part;cytoskeleton;extracellular membrane-bounded organelle;extracellular organelle;extracellular region part;extracellular vesicular exosome;Golgi apparatus part;intracellular membrane-bounded organelle;intracellular non-membrane-bounded organelle;intracellular organelle;intracellular organelle part;intracellular part…	Focal adhesion;MAPK signaling pathway	Acetylation;Actin-binding;Alternativesplicing;Ciliumbiogenesis/degradation;Completeproteome;Cytoplasm;Cytoskeleton;Phosphoprotein;Referenceproteome;Repeat
P70290;B7ZCL8;A2AN84;B7ZCL9;B7ZCM0;D6RFD5;B7ZCM1	P70290;B7ZCL8;A2AN84;B7ZCL9;B7ZCM0	55 kDa erythrocyte membrane protein	Mpp1	25.4793	25.0337	24.9882	25.5413	NaN	25.002	25.3165	24.995	24.9903	24.6765		0.0107781	0.957326	-0.00779819	6	6	6	18.5	18.5	18.5	52.227	0	12.076	2045600000	46	biological regulation;regulation of behavior;regulation of biological process;regulation of cell migration;regulation of cell motility;regulation of cellular component movement;regulation of cellular process;regulation of chemotaxis;regulation of immune system process;regulation of leukocyte chemotaxis;regulation of leukocyte migration;regulation of localization;regulation of locomotion;regulatio…		cell cortex part;cell part;cell projection;cortical cytoskeleton;cytoplasmic part;cytoskeleton;intracellular non-membrane-bounded organelle;intracellular organelle;intracellular part;membrane;microvillus;non-membrane-bounded organelle;organelle;organelle part;stereocilium		Cellprojection;Completeproteome;Lipoprotein;Membrane;Palmitate;Phosphoprotein;Referenceproteome;SH3domain
Q8CBW3;Q8CBW3-4;B7ZCU2;B7ZCU5;B7ZCU4;B7ZCU3;B7ZCU0;J3QNK8;Q8CBW3-5;Q8CBW3-2;Q8CBW3-3;P62484;A0A087WP64;A0A087WPE6;A0A087WNT3;A0A087WNU9;A0A087WRS3;A0A087WPP8;Q6AXH6;Q6AXD2	Q8CBW3;Q8CBW3-4;B7ZCU2;B7ZCU5;B7ZCU4;B7ZCU3;B7ZCU0;J3QNK8;Q8CBW3-5;Q8CBW3-2;Q8CBW3-3	Abl interactor 1	Abi1	NaN	NaN	26.1214	26.0192	NaN	NaN	25.9389	NaN	26.0247	26.1677		0	0.941721	-0.182491	3	3	3	7.5	7.5	7.5	52.287	0	6.967	2024100000	21	anatomical structure development;anatomical structure formation involved in morphogenesis;anatomical structure morphogenesis;anterior/posterior pattern specification;behavior;camera-type eye development;cell development;cell migration;cell motility;cell part morphogenesis;cell projection morphogenesis;cell projection organization;cellular component morphogenesis;cellular component movement;cellul…	enzyme activator activity;enzyme regulator activity;kinase activator activity;kinase regulator activity;protein kinase activator activity;protein kinase regulator activity;protein tyrosine kinase activator activity	adherens junction;anchoring junction;cell junction;cell part;cell projection;cell projection part;cell-cell adherens junction;cell-cell junction;cytoplasm;cytoplasmic part;cytoskeleton;cytosol;dendrite;filopodium;growth cone;intracellular;intracellular membrane-bounded organelle;intracellular non-membrane-bounded organelle;intracellular organelle;intracellular part;lamellipodium;membrane-bounded …	Regulation of actin cytoskeleton	Acetylation;Alternativesplicing;Celljunction;Cellprojection;Coiledcoil;Completeproteome;Cytoplasm;Cytoskeleton;Nucleus;Phosphoprotein;Referenceproteome;SH3domain;Synapse;Synaptosome
Q80X19;B7ZNH7;K3W4R4;Q80X19-2;F7D5Y4	Q80X19;B7ZNH7;K3W4R4;Q80X19-2	Collagen alpha-1(XIV) chain	Col14a1	NaN	NaN	NaN	NaN	NaN	NaN	NaN	NaN	NaN	NaN		-4.34294e-08	1	0	10	10	10	7.8	7.8	7.8	193.01	0	40.804	1631800000	22	anatomical structure development;anatomical structure homeostasis;biological adhesion;biological regulation;cardiac muscle tissue development;cell adhesion;cellular component organization;cellular component organization at cellular level;cellular component organization or biogenesis;cellular component organization or biogenesis at cellular level;cellular process;collagen fibril organization;devel…		collagen;extracellular matrix;extracellular matrix part;extracellular region part;extracellular space;interstitial matrix;proteinaceous extracellular matrix	Protein digestion and absorption	Alternativesplicing;Celladhesion;Collagen;Completeproteome;Disulfidebond;Extracellularmatrix;Glycoprotein;Hydroxylation;Referenceproteome;Repeat;Secreted;Signal
B7ZNL3	B7ZNL3		Tpm1	NaN	NaN	NaN	NaN	NaN	31.2277	31.2047	NaN	NaN	NaN		0	0.94131	NaN	30	3	0	77.1	8.8	0	32.637	0	25.334	41750000000	29	chordate embryonic development;developmental process;embryo development;embryo development ending in birth or egg hatching;in utero embryonic development	structural constituent of cytoskeleton;structural molecule activity	cell part;contractile fiber part;cytoplasmic part;cytoskeletal part;intracellular organelle part;intracellular part;muscle thin filament tropomyosin;organelle part	Cardiac muscle contraction;Dilated cardiomyopathy;Hypertrophic cardiomyopathy (HCM)	Coiledcoil;Completeproteome;Referenceproteome
Q91VU7;B7ZNL8;F6XMS4	Q91VU7;B7ZNL8		Pus7	25.6329	25.6802	25.2673	25.4587	25.758	26.3087	NaN	25.43	25.2053	25.3625		0	0.940899	0.781876	4	4	4	8.2	8.2	8.2	74.792	0	28.587	1681500000	30	cellular macromolecule metabolic process;cellular metabolic process;cellular nitrogen compound metabolic process;cellular process;macromolecule metabolic process;macromolecule modification;metabolic process;nitrogen compound metabolic process;nucleic acid metabolic process;nucleobase-containing compound metabolic process;primary metabolic process;pseudouridine synthesis;RNA metabolic process;RNA …	binding;catalytic activity;intramolecular transferase activity;isomerase activity;nucleic acid binding;pseudouridine synthase activity;RNA binding			Completeproteome;Referenceproteome
[truncated: 3,951 more rows]

## Sheet: HFD_LFD
				SCs WT LFD			SCs WT HFD		SCs MDX LFD		SCs MDX HFD			Annotations				Student t-test S0=0.1; pValue<0.05
Protein IDs	Majority protein IDs	Protein names	Gene names	SCs_WT_LF_2	SCs_WT_LF_3	SCs_WT_LF_4	SCs_WT_HF_2	SCs_WT_HF_3	SCs_MDX_LF_2	SCs_MDX_LF_3	SCs_MDX_HF_1	SCs_MDX_HF_2	SCs_MDX_HF_3	GOBP name	GOMF name	GOCC name	KEGG name	Student's t-test Significant SCs_WT_HF_SCs_WT_LF	Student's t-test Significant SCs_MDX_HF_SCs_MDX_LF	-Log Student's t-test p-value SCs_WT_HF_SCs_WT_LF	-Log Student's t-test p-value SCs_MDX_HF_SCs_MDX_LF	Student's t-test Difference SCs_WT_HF_SCs_WT_LF	Student's t-test Difference SCs_MDX_HF_SCs_MDX_LF	Student's t-test Test statistic SCs_WT_HF_SCs_WT_LF	Student's t-test Test statistic SCs_MDX_HF_SCs_MDX_LF
[truncated: 4,310 more rows]

## Sheet: Diet-restored
				SCs MDX LFD			SCs MDX HFD		SCs WT LFD
[truncated: 221 more rows]
